# Supplementary material
Source: MDPI journal article supplement (https://www.mdpi.com/2673-401X/4/1/7)

**Supporting information**

**Manuscript title:**

*Thia-Michael reaction under heterogeneous catalysis*

**Authors:** Giovanna Bosica\*, Roderick Abdilla and Alessio Petrellini

**Copies of the spectra of the products are in the following Appendix**

**(3a) Ethyl 3-(phenylthio)propanoate**

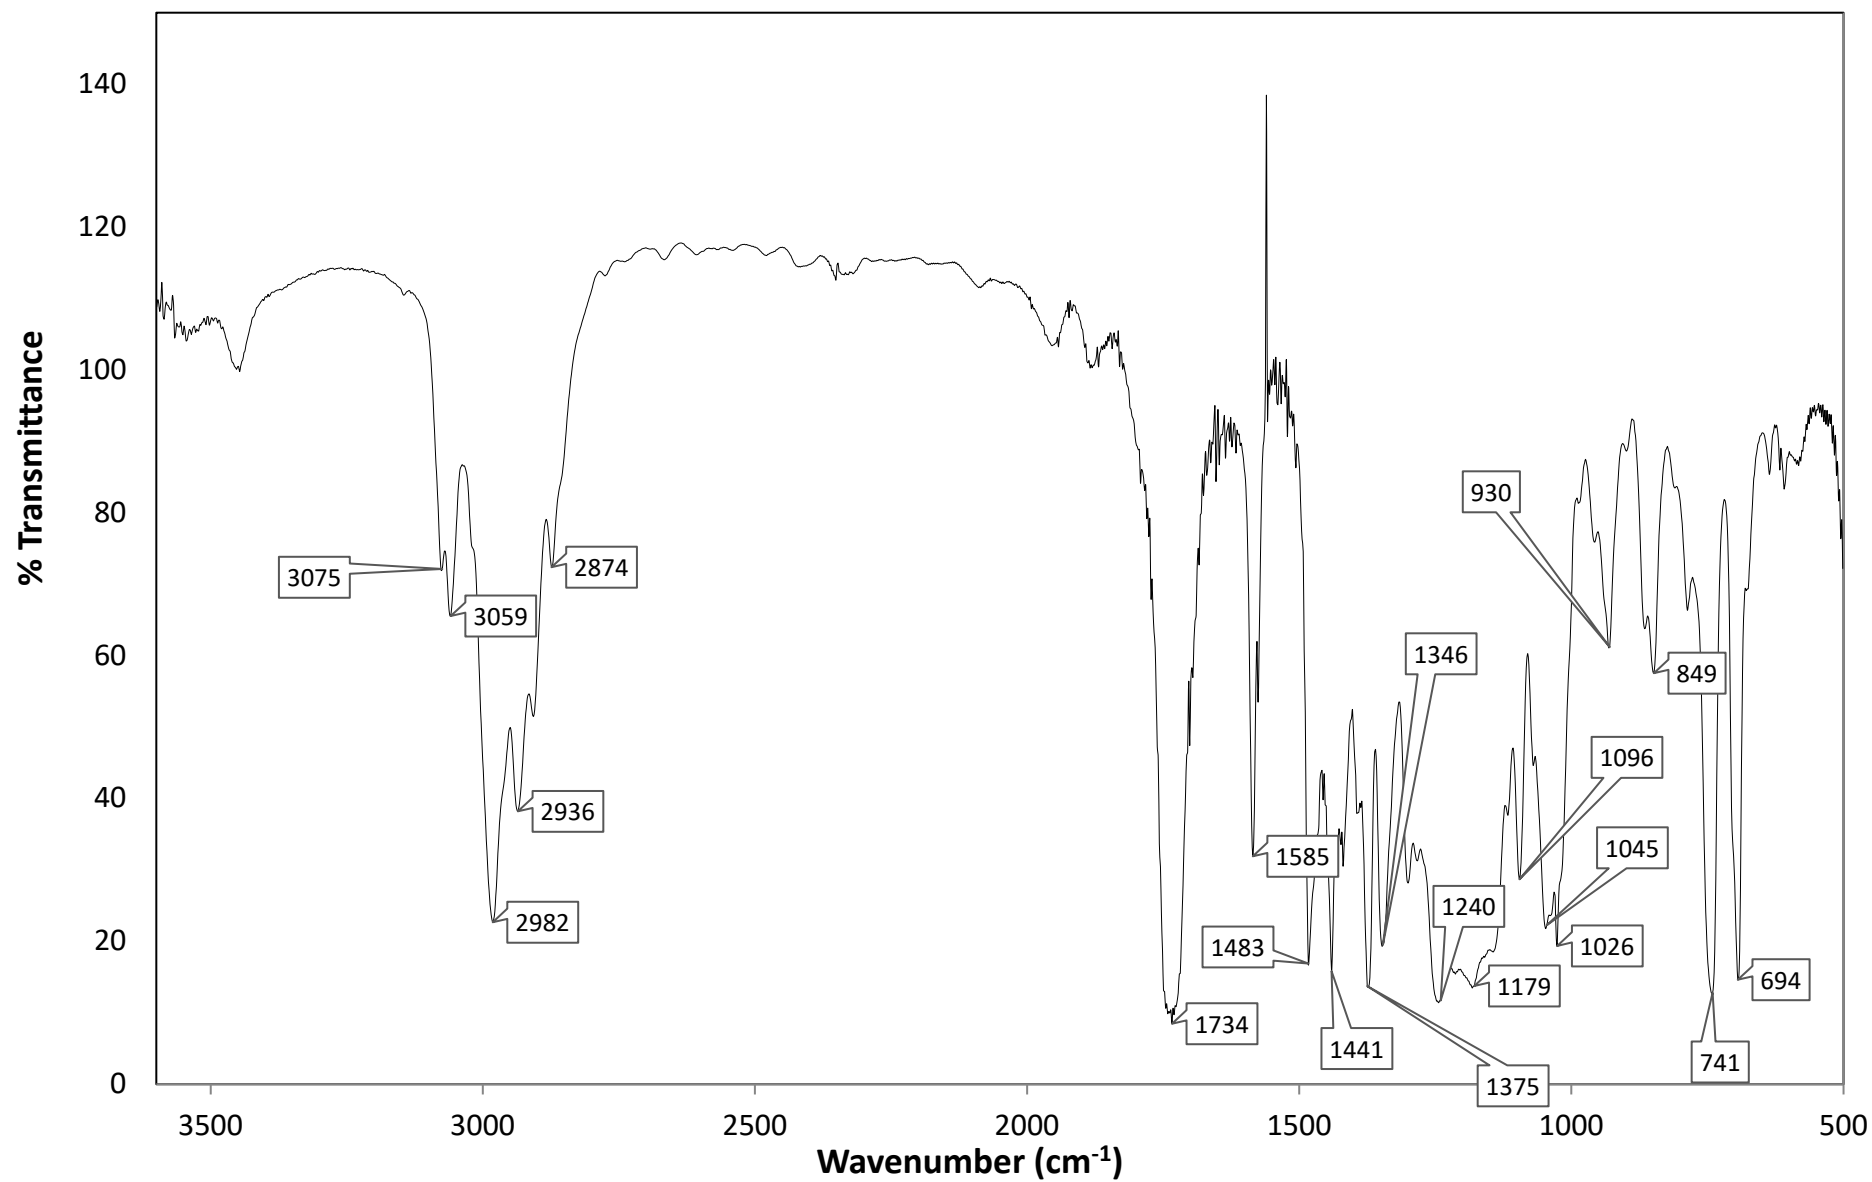

7.41  
7.40  
7.40  
7.39  
7.39  
7.39  
7.39  
7.38  
7.34  
7.34  
7.33  
7.32  
7.32  
7.31  
7.31  
7.25  
7.25  
7.25  
7.24  
7.24  
7.23  
7.22  
7.22

4.19  
4.17  
4.16  
4.14

3.21  
3.19  
3.18

2.66  
2.65  
2.64  
2.64  
2.63

1.29  
1.28  
1.26

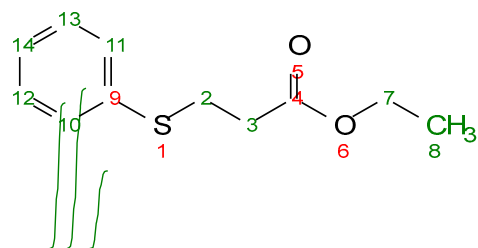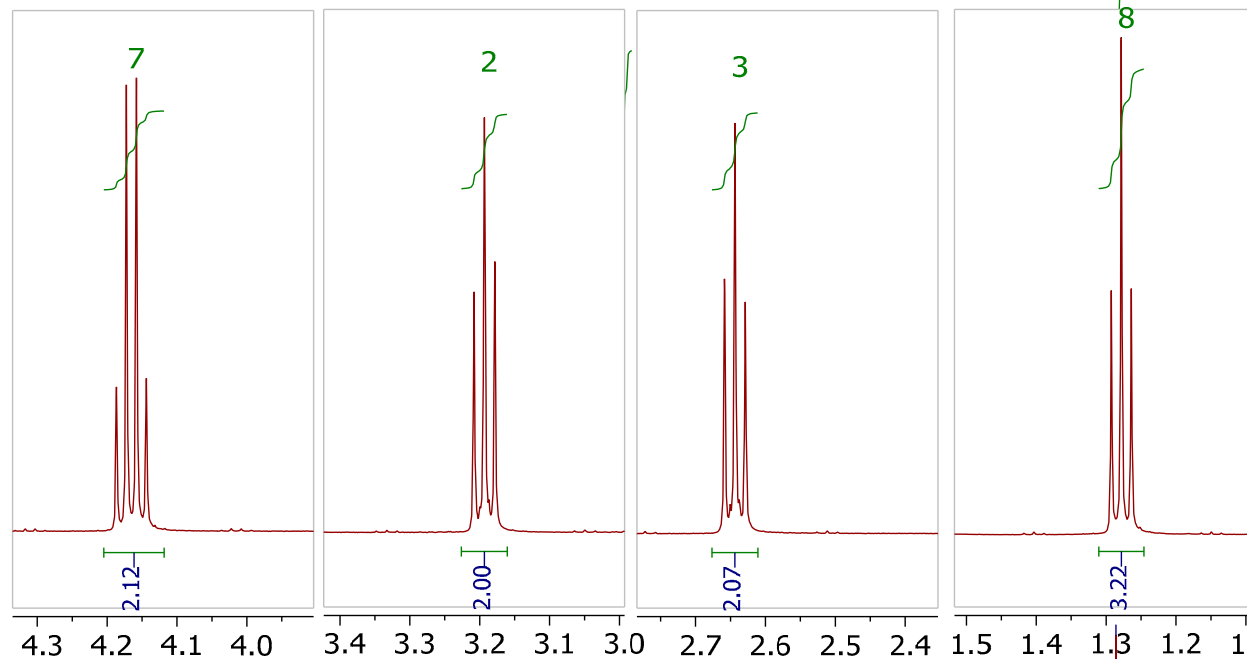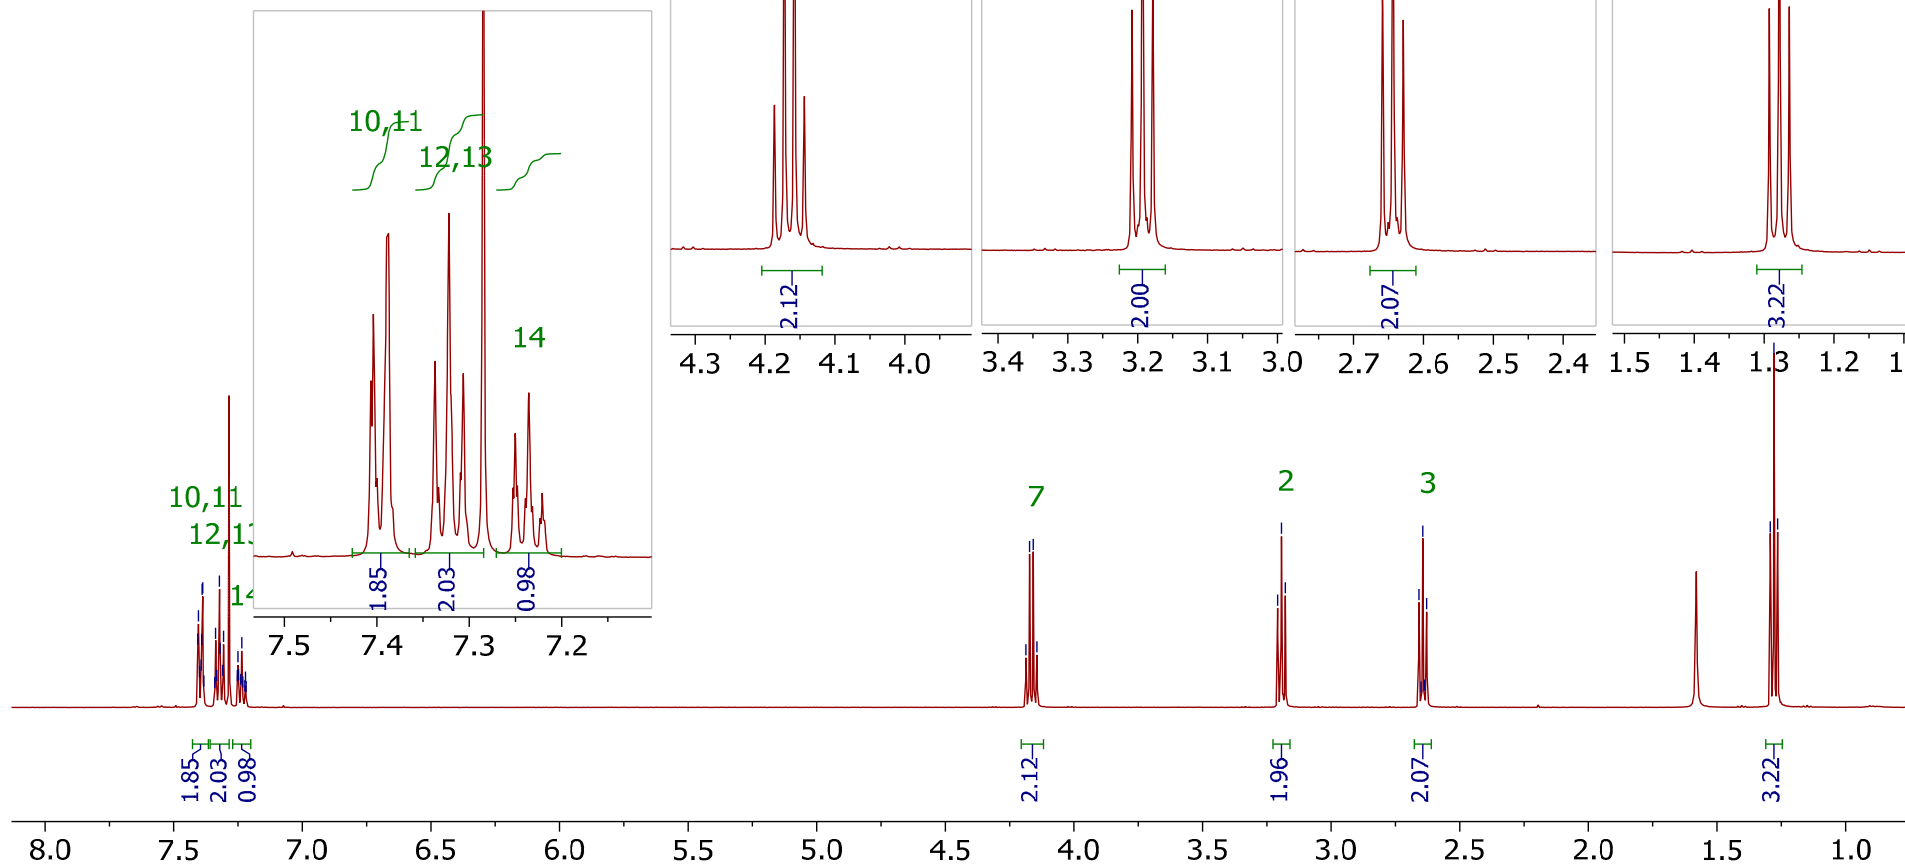

AP 6\_1 21 (0.704)

Scan AP+  
1.34e8

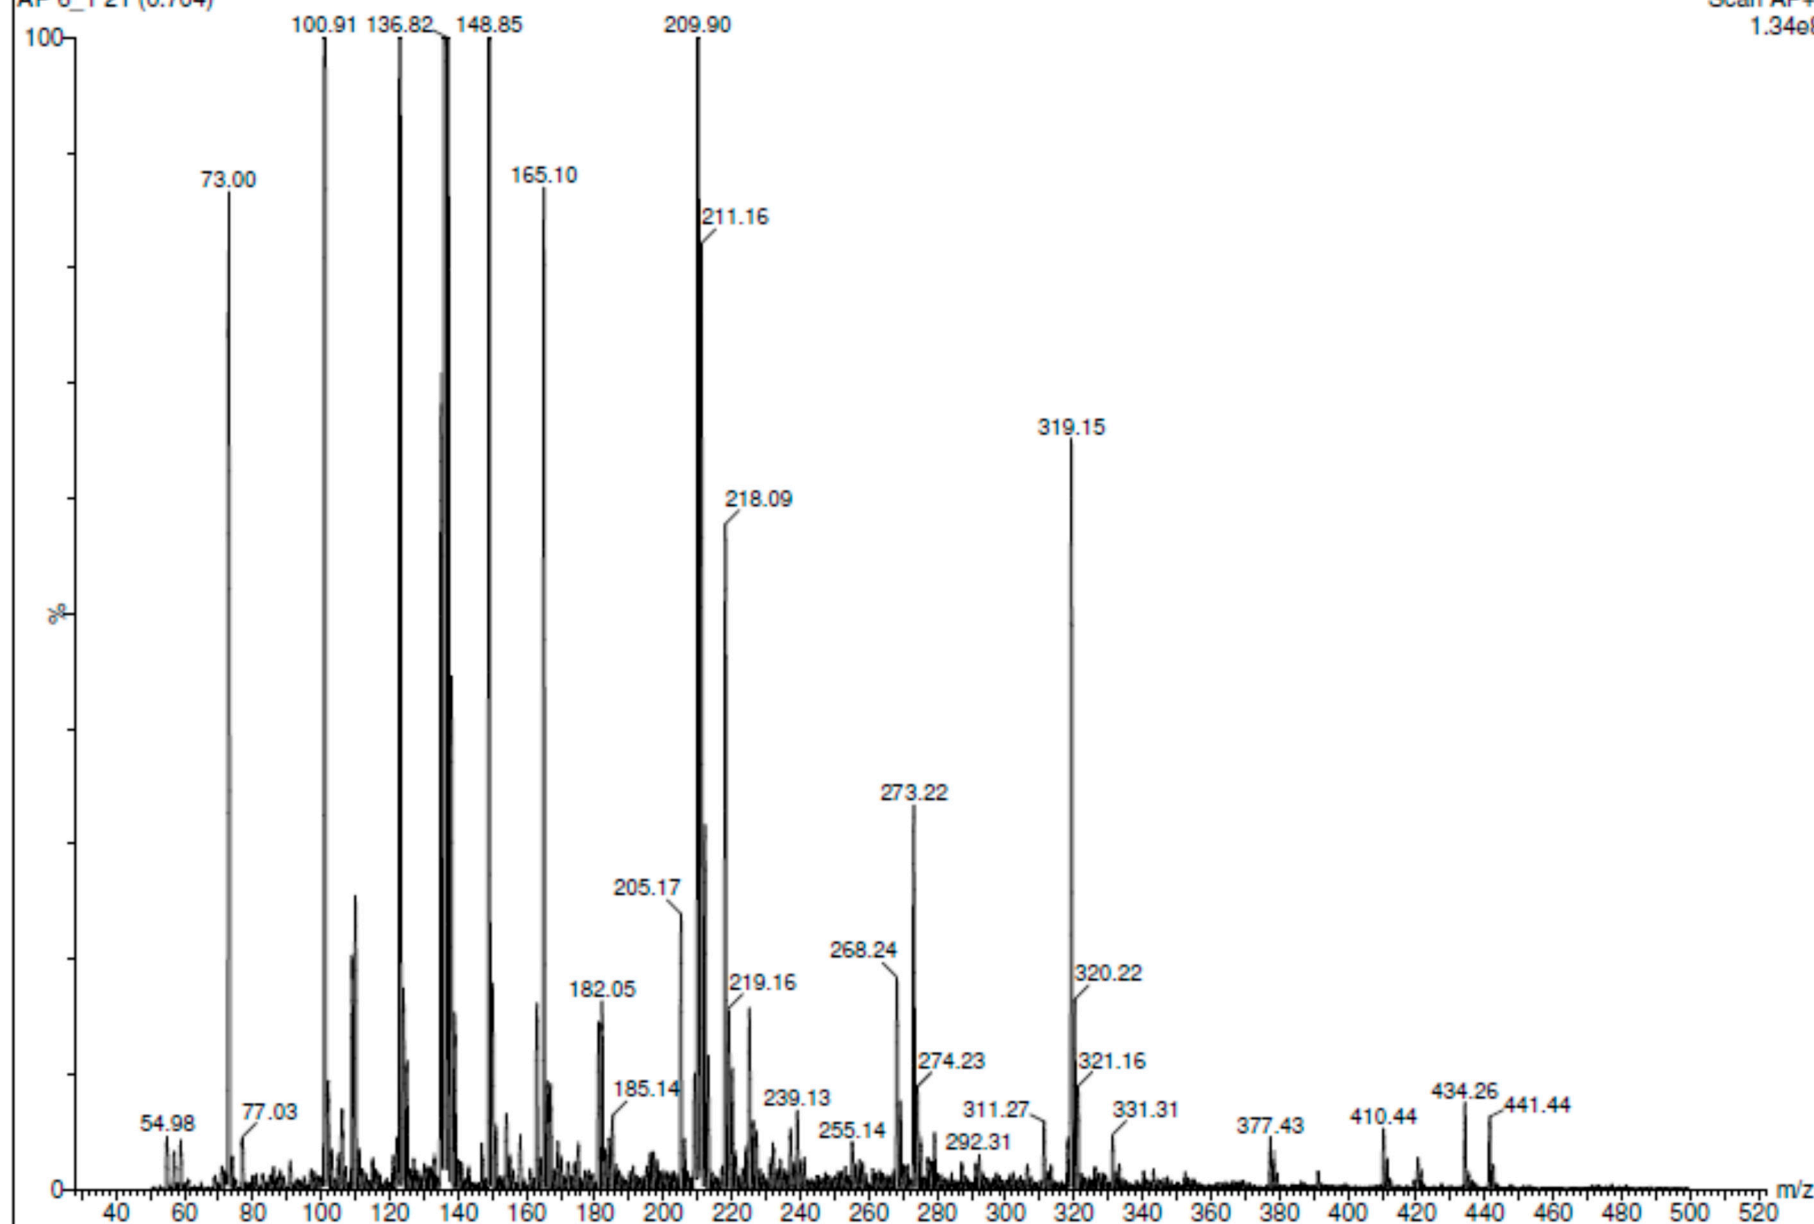

**(3b) 3-(phenylthio)propanenitrile**

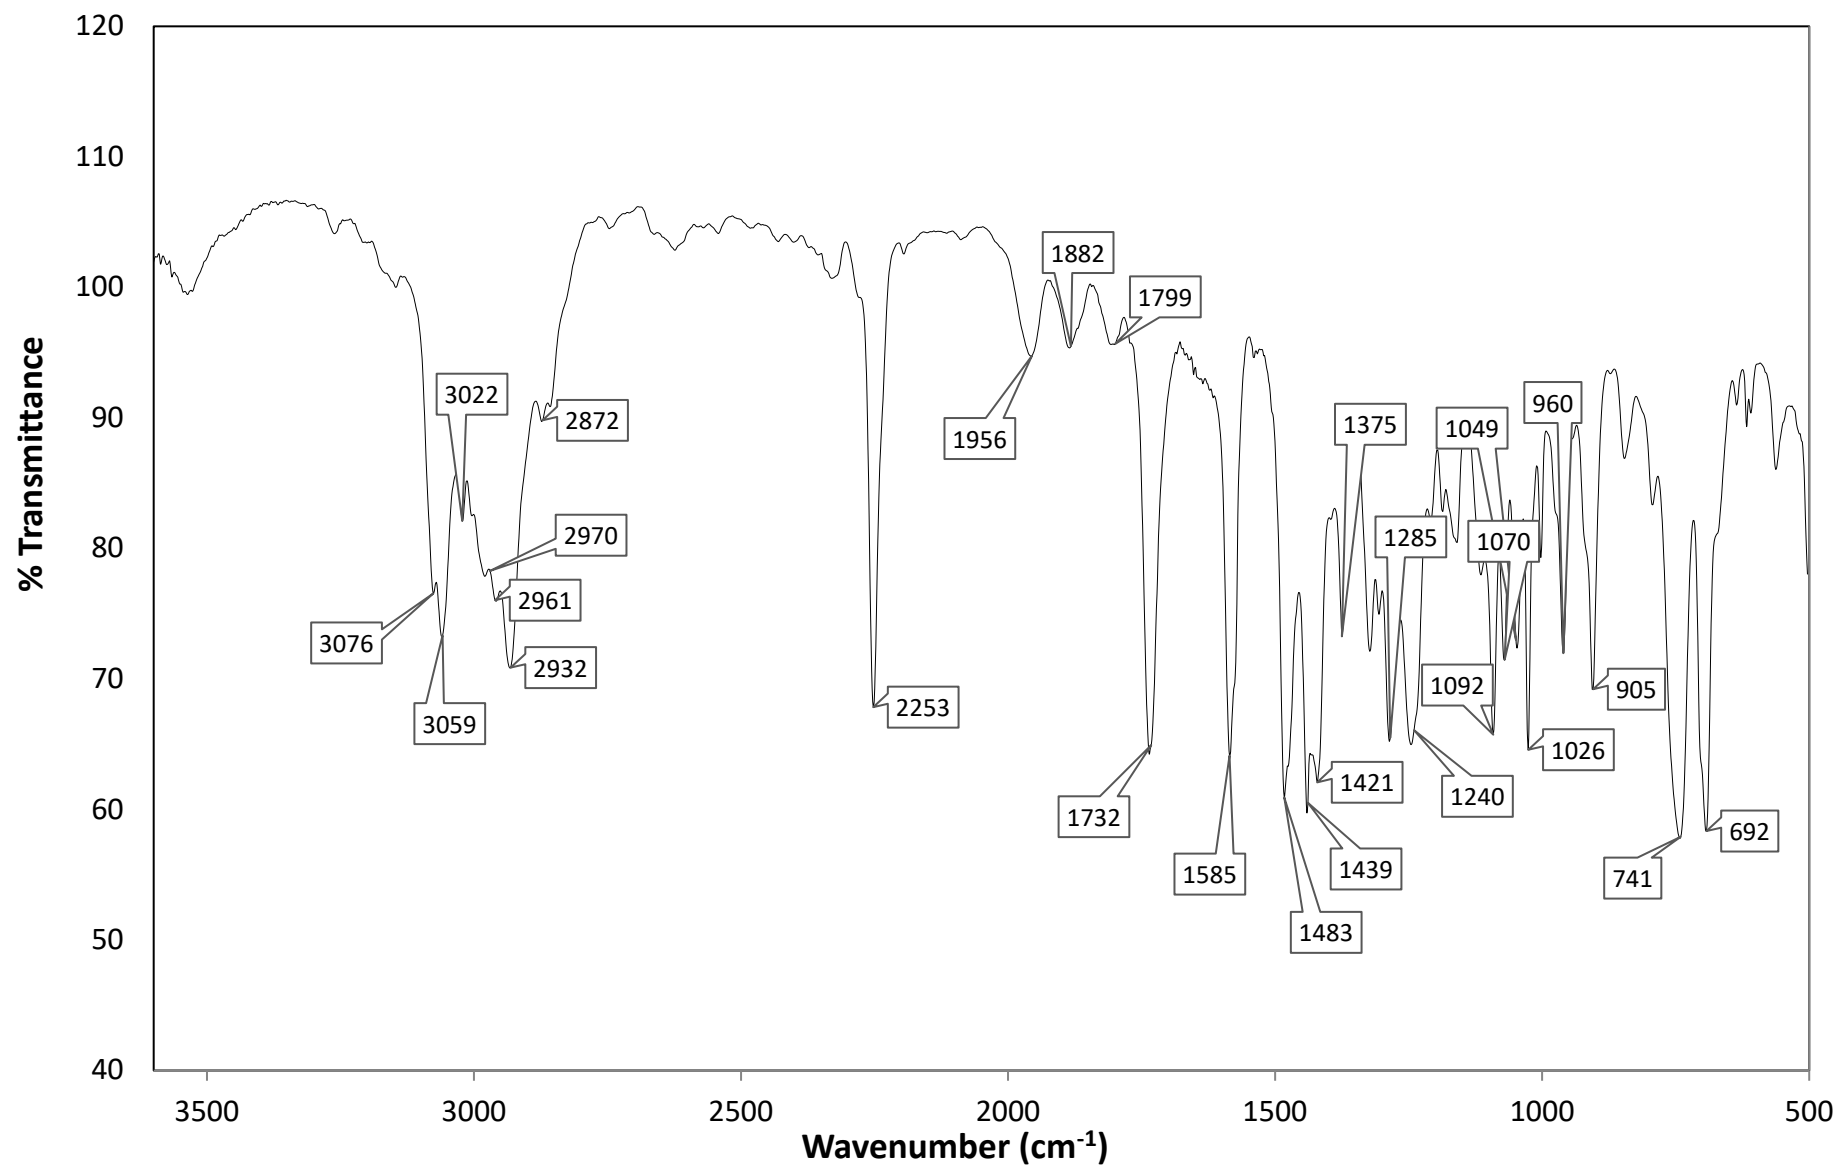

7.46  
7.46  
7.45  
7.45  
7.44  
7.44  
7.44  
7.39  
7.39  
7.38  
7.38  
7.37  
7.37  
7.37  
7.36  
7.35  
7.35  
7.34  
7.33  
7.33  
7.33  
7.32  
7.32  
7.31  
7.31  
7.30  
7.30

3.17  
3.15  
3.14  
2.63  
2.62  
2.60

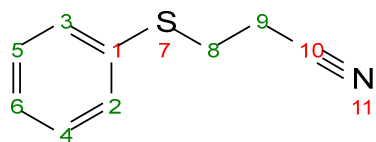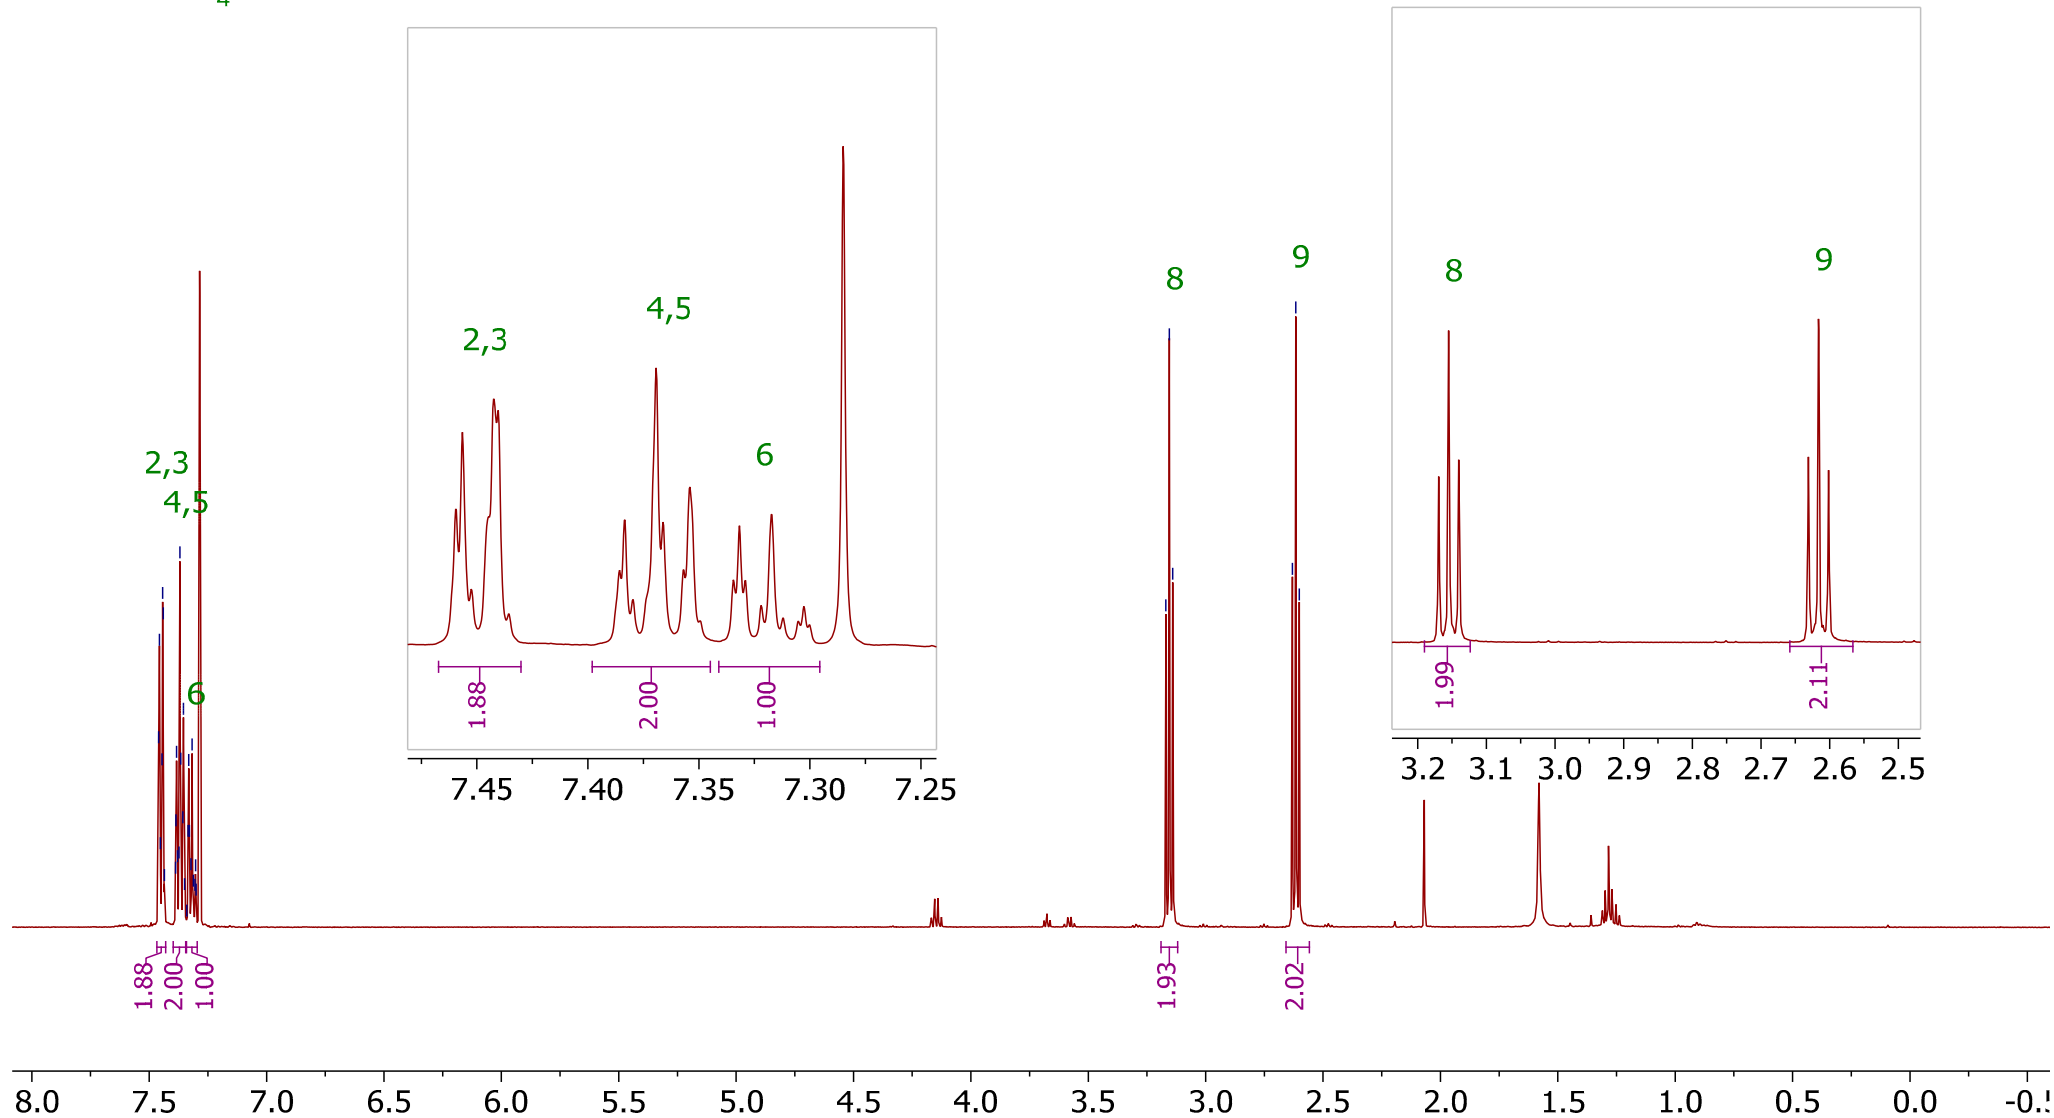

**(3c) Dimethyl 2-(phenylthio)succinate**

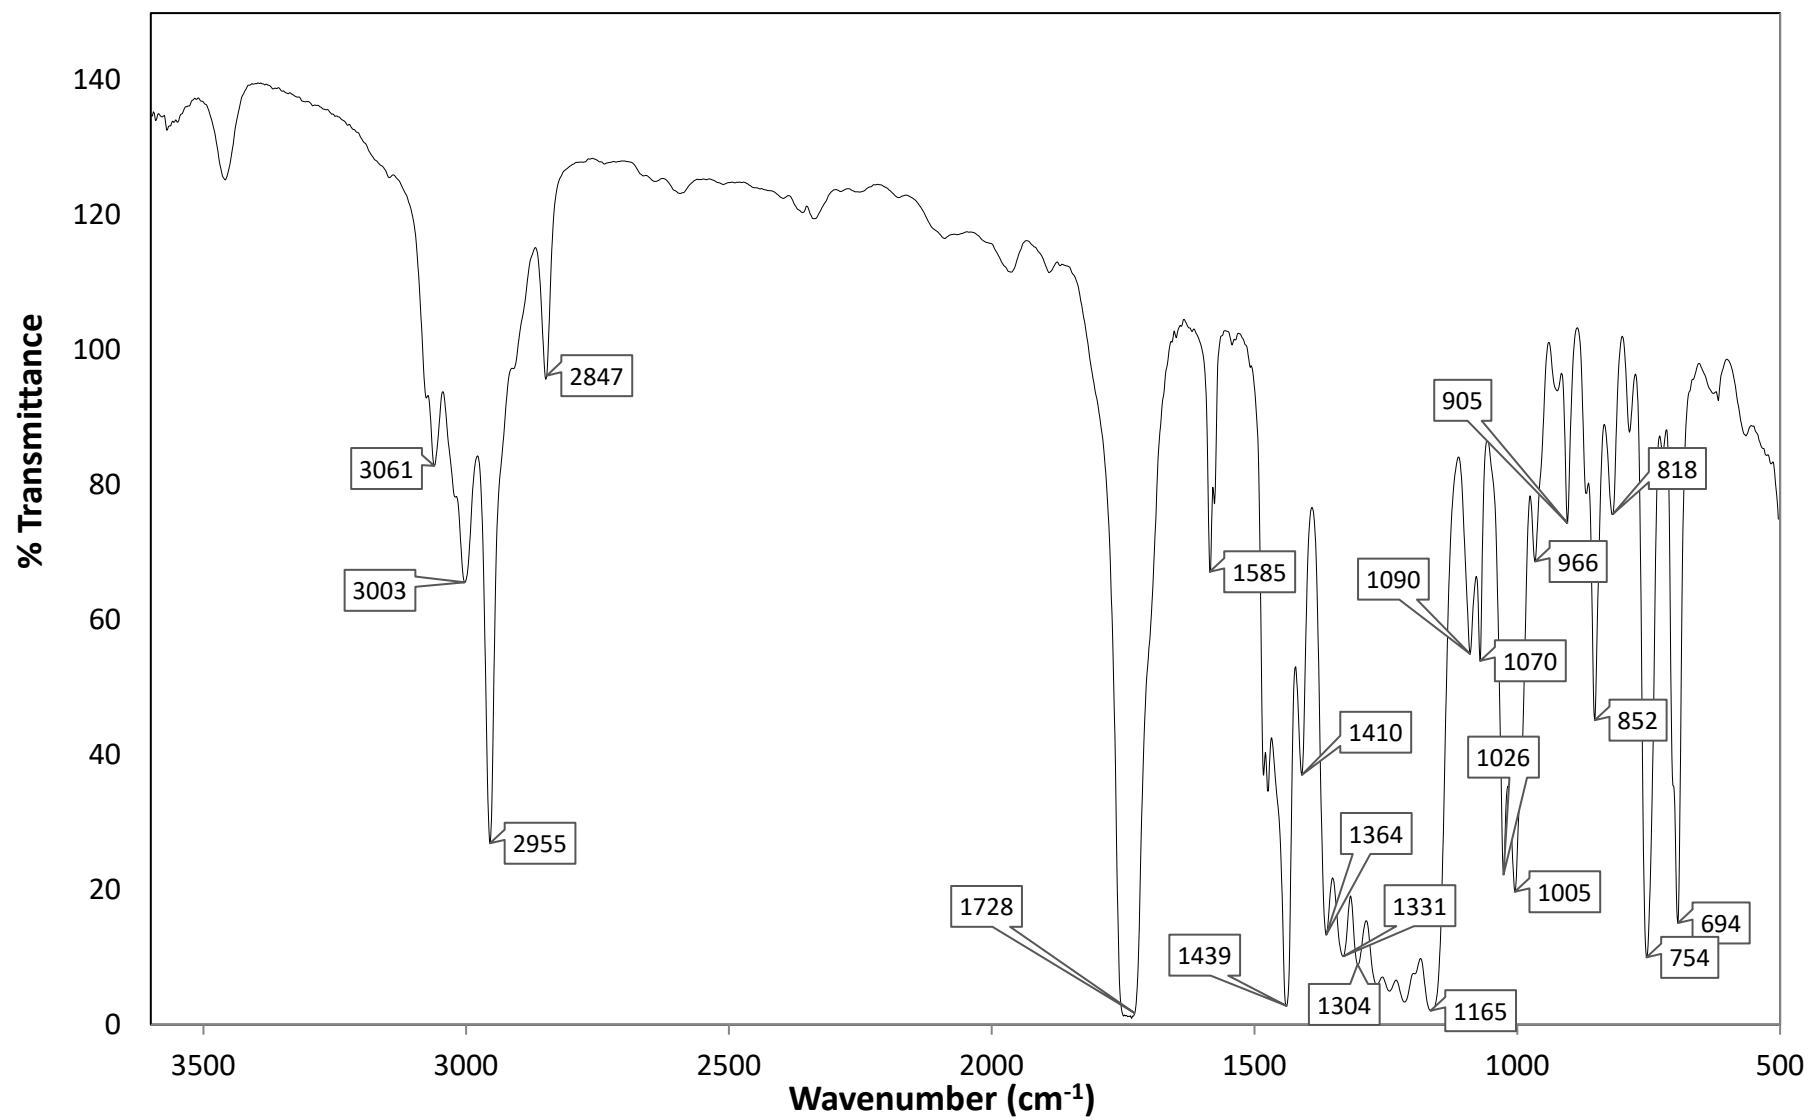

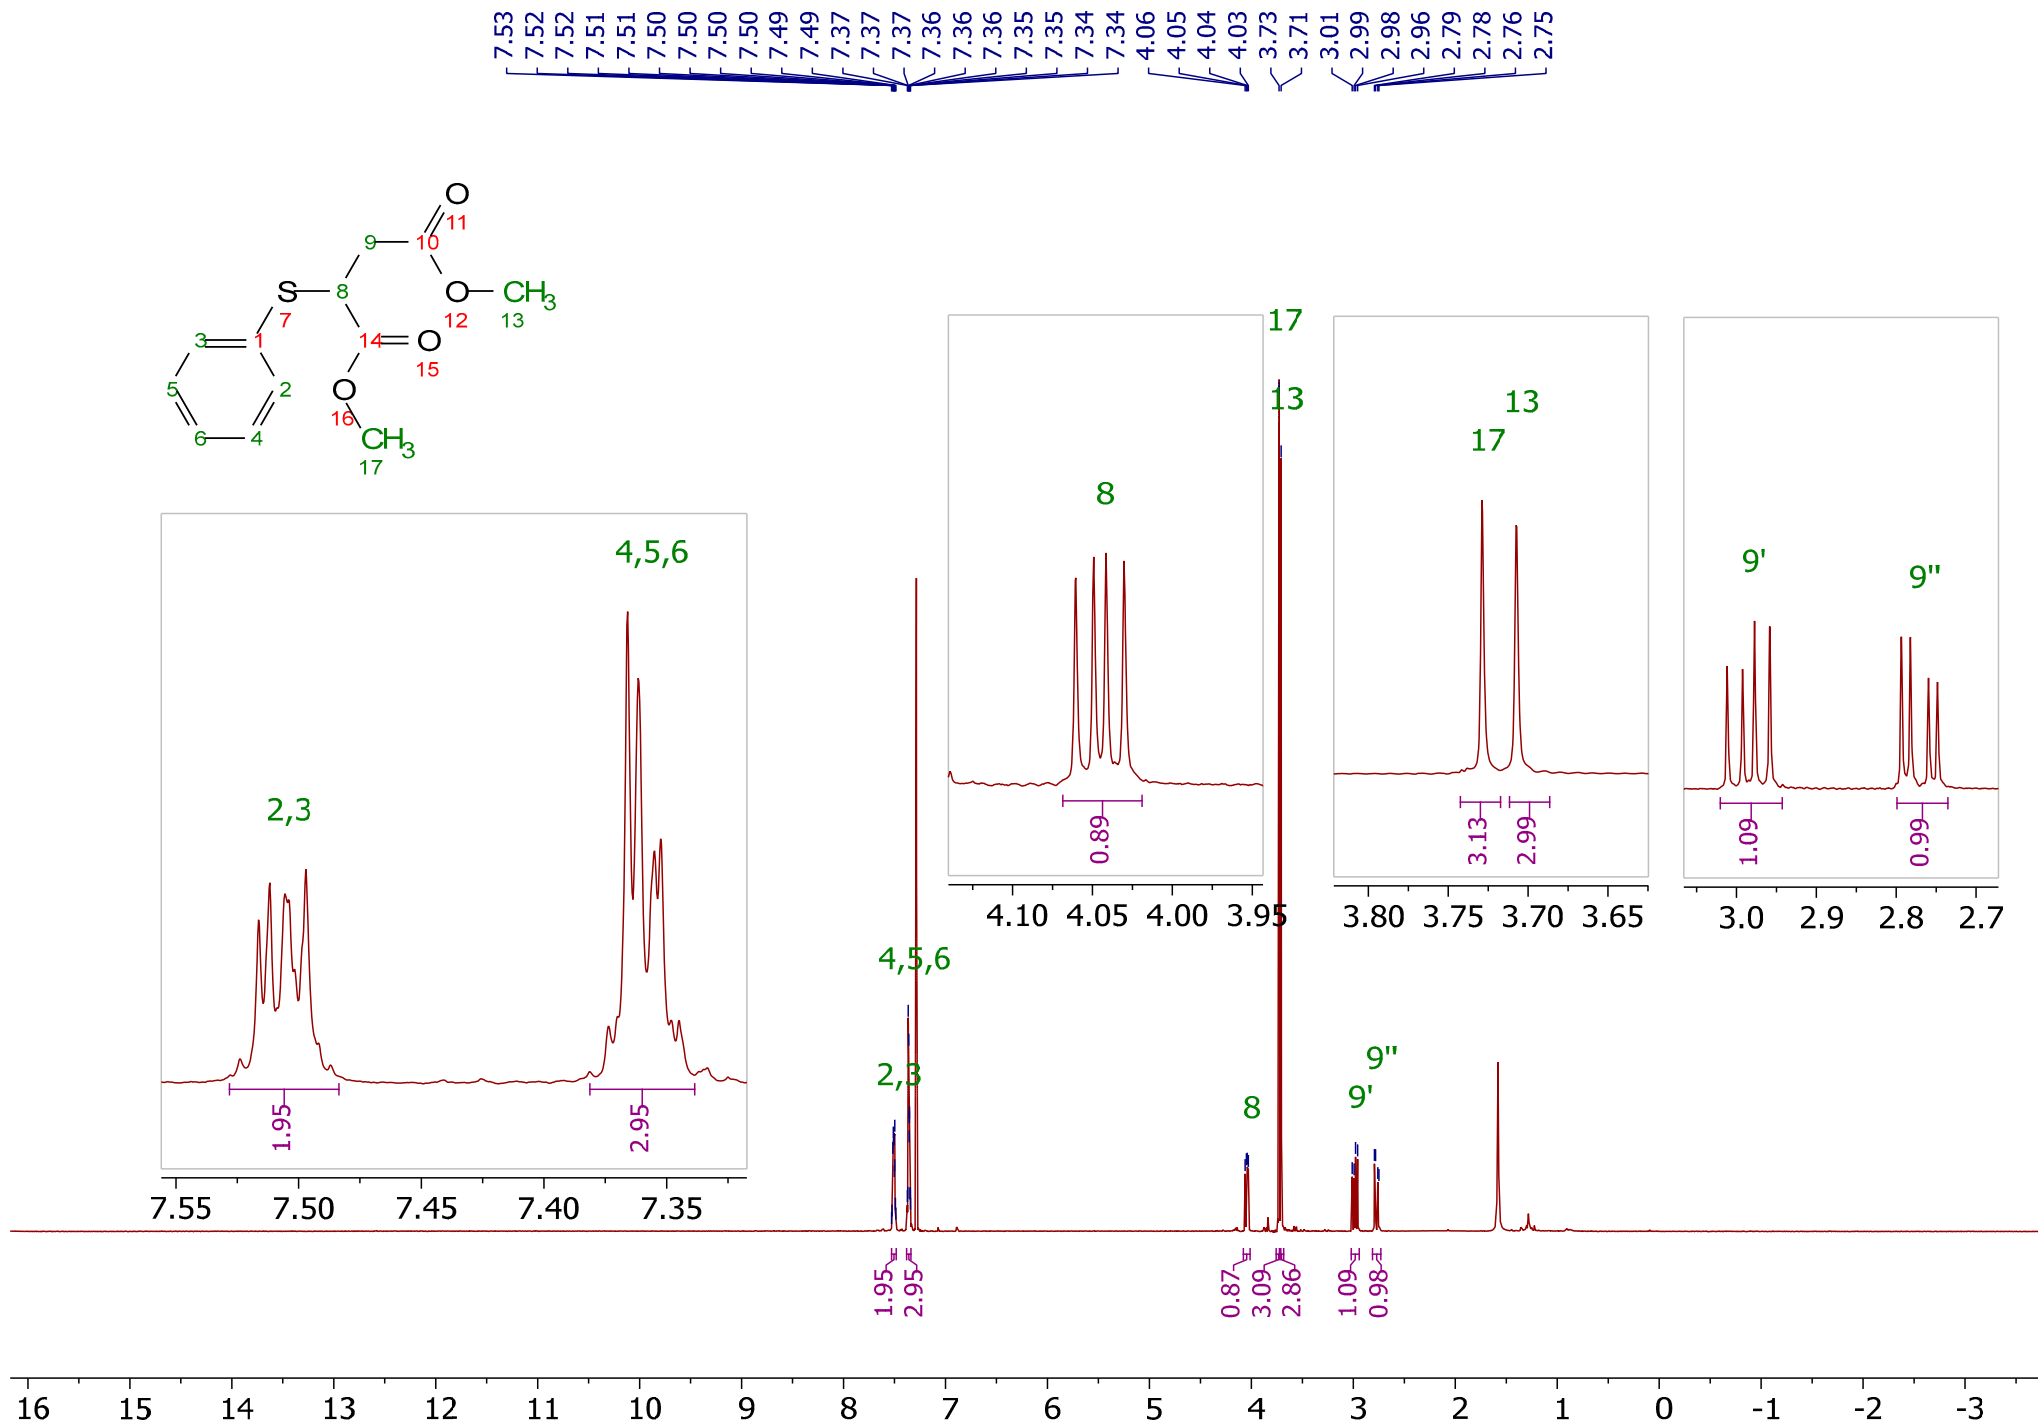

**(3d) 3-(phenylthio)propenamide**

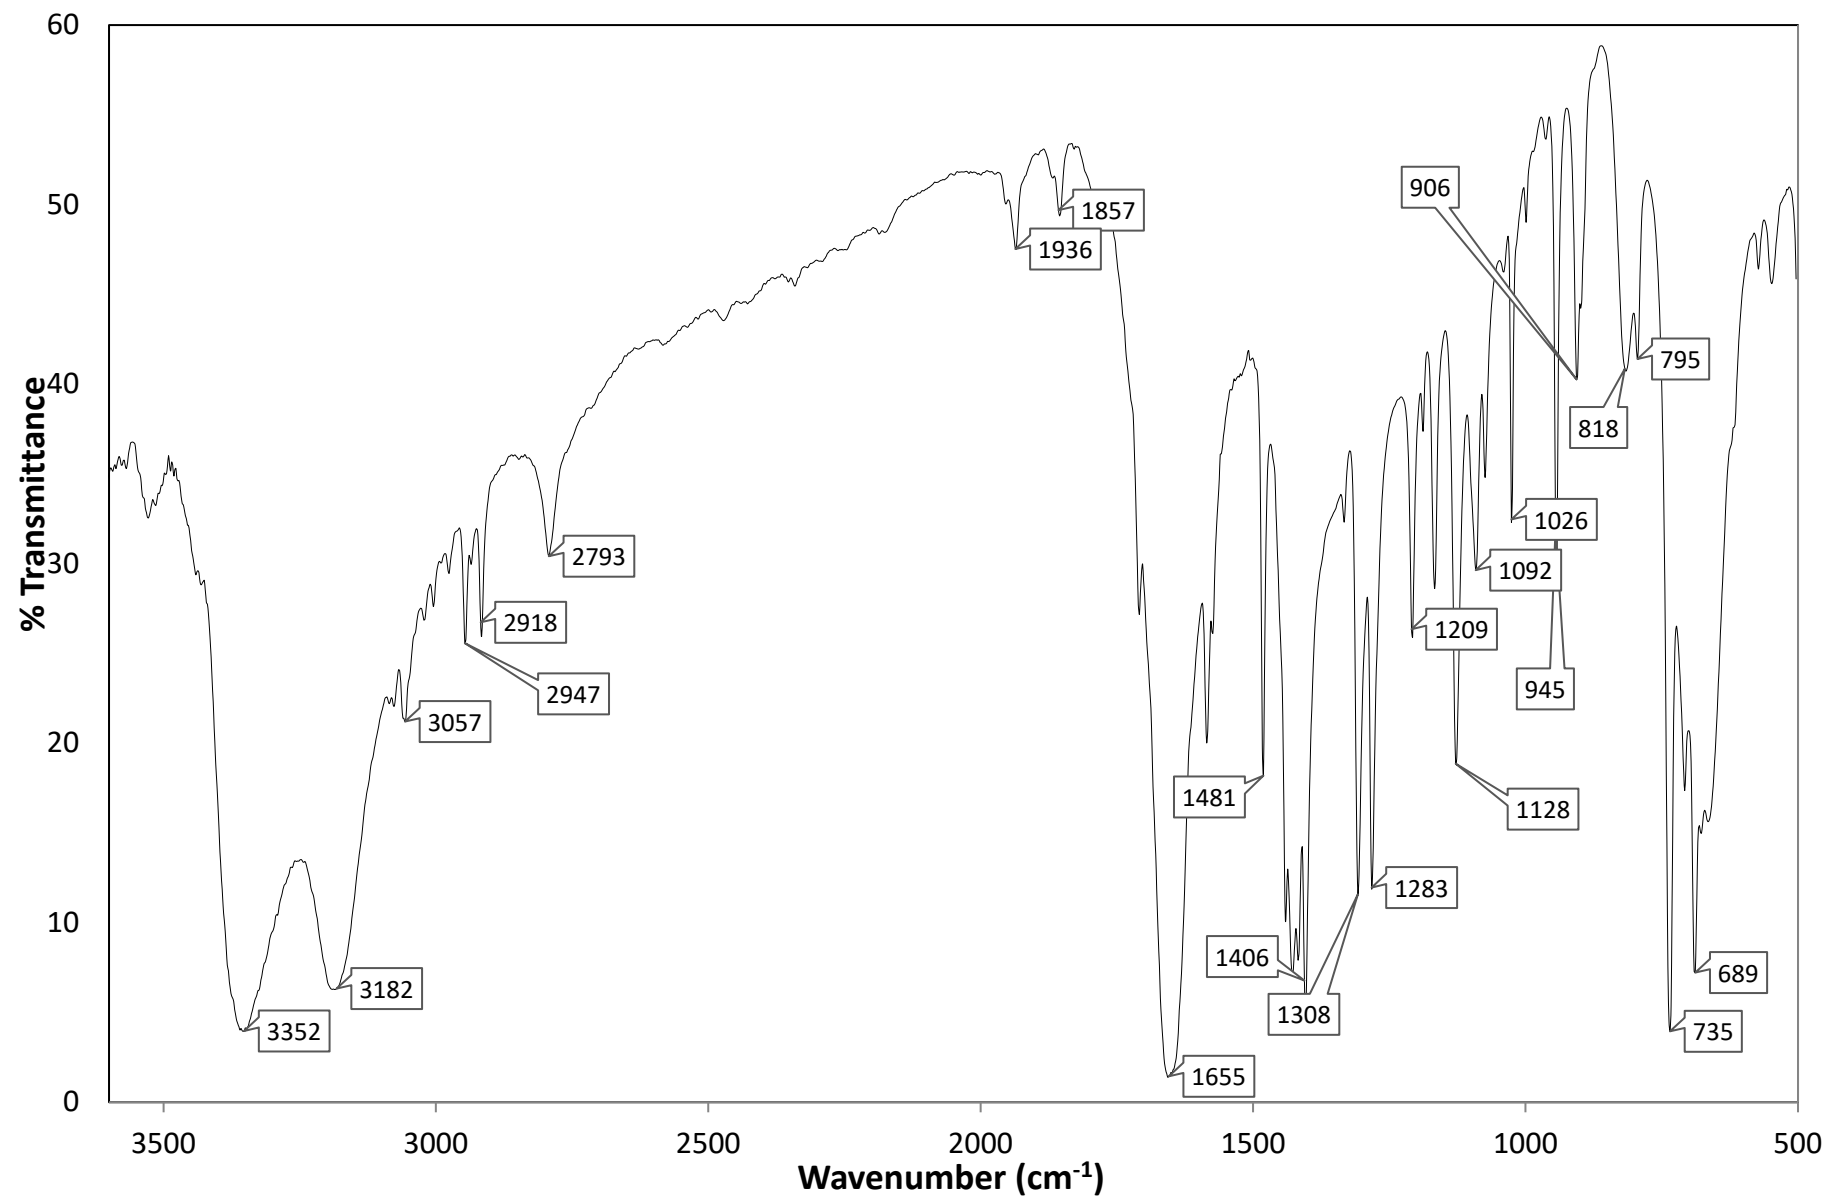

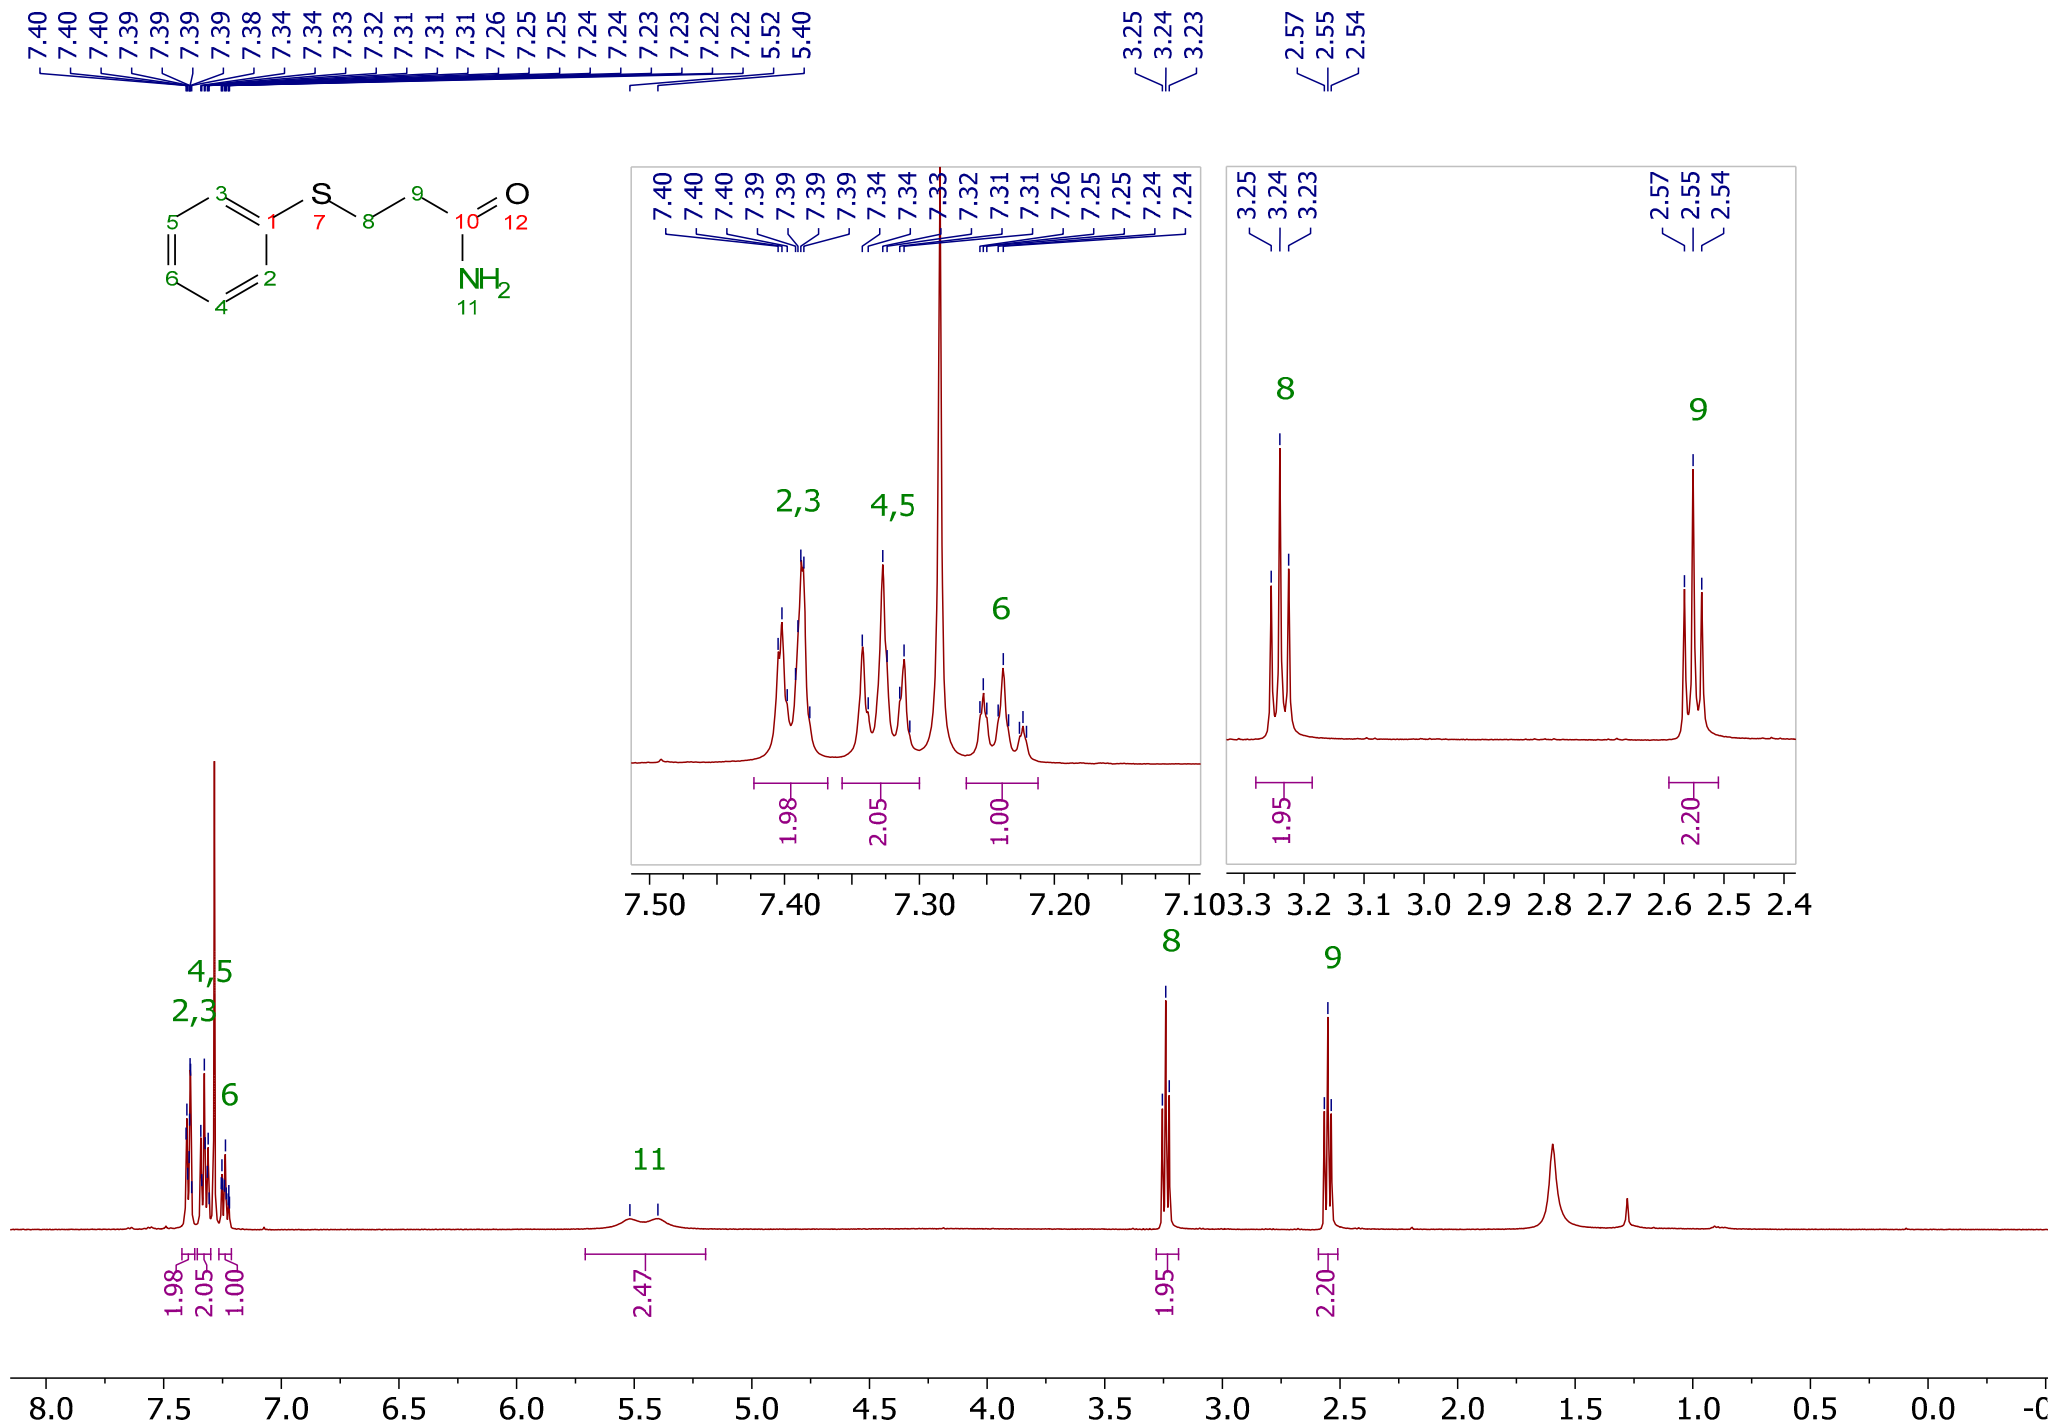

**(3e) 4-(phenylthio)butan-2-one**

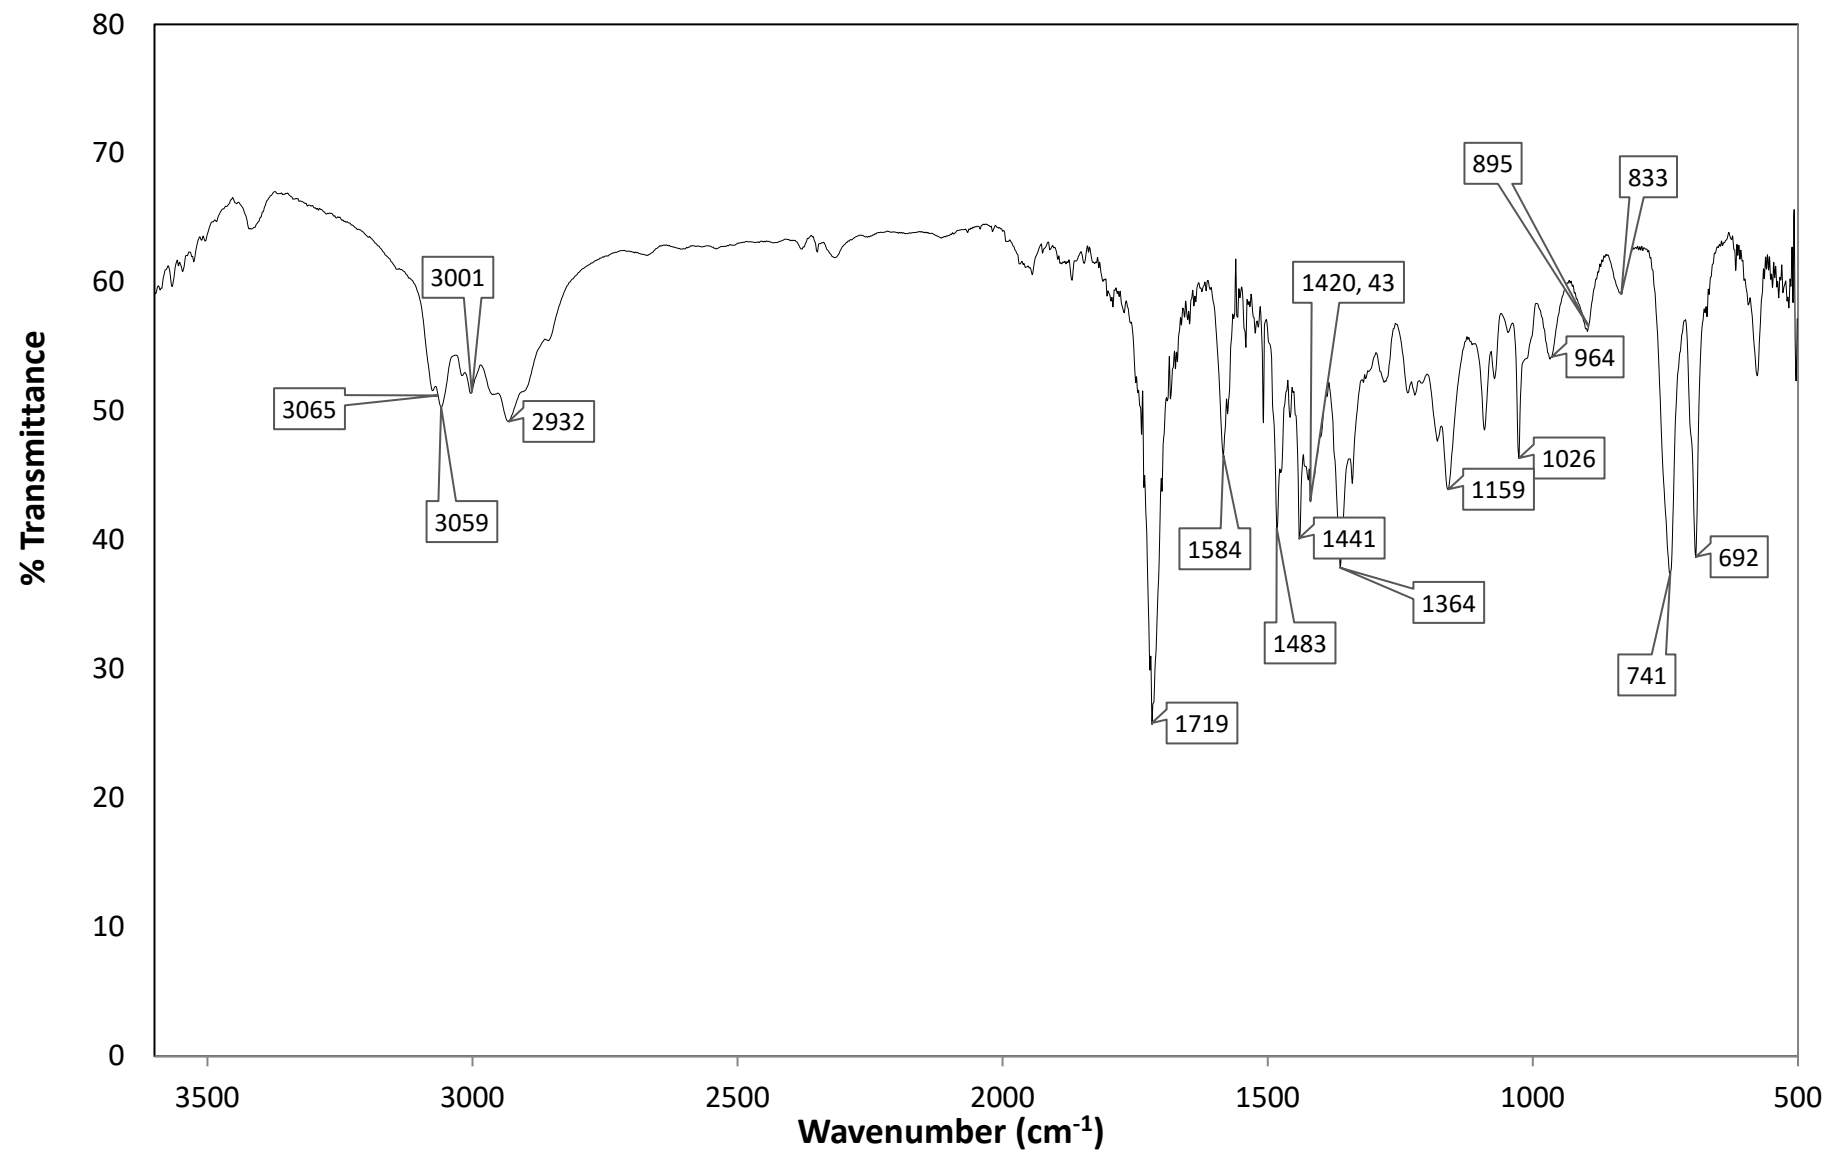

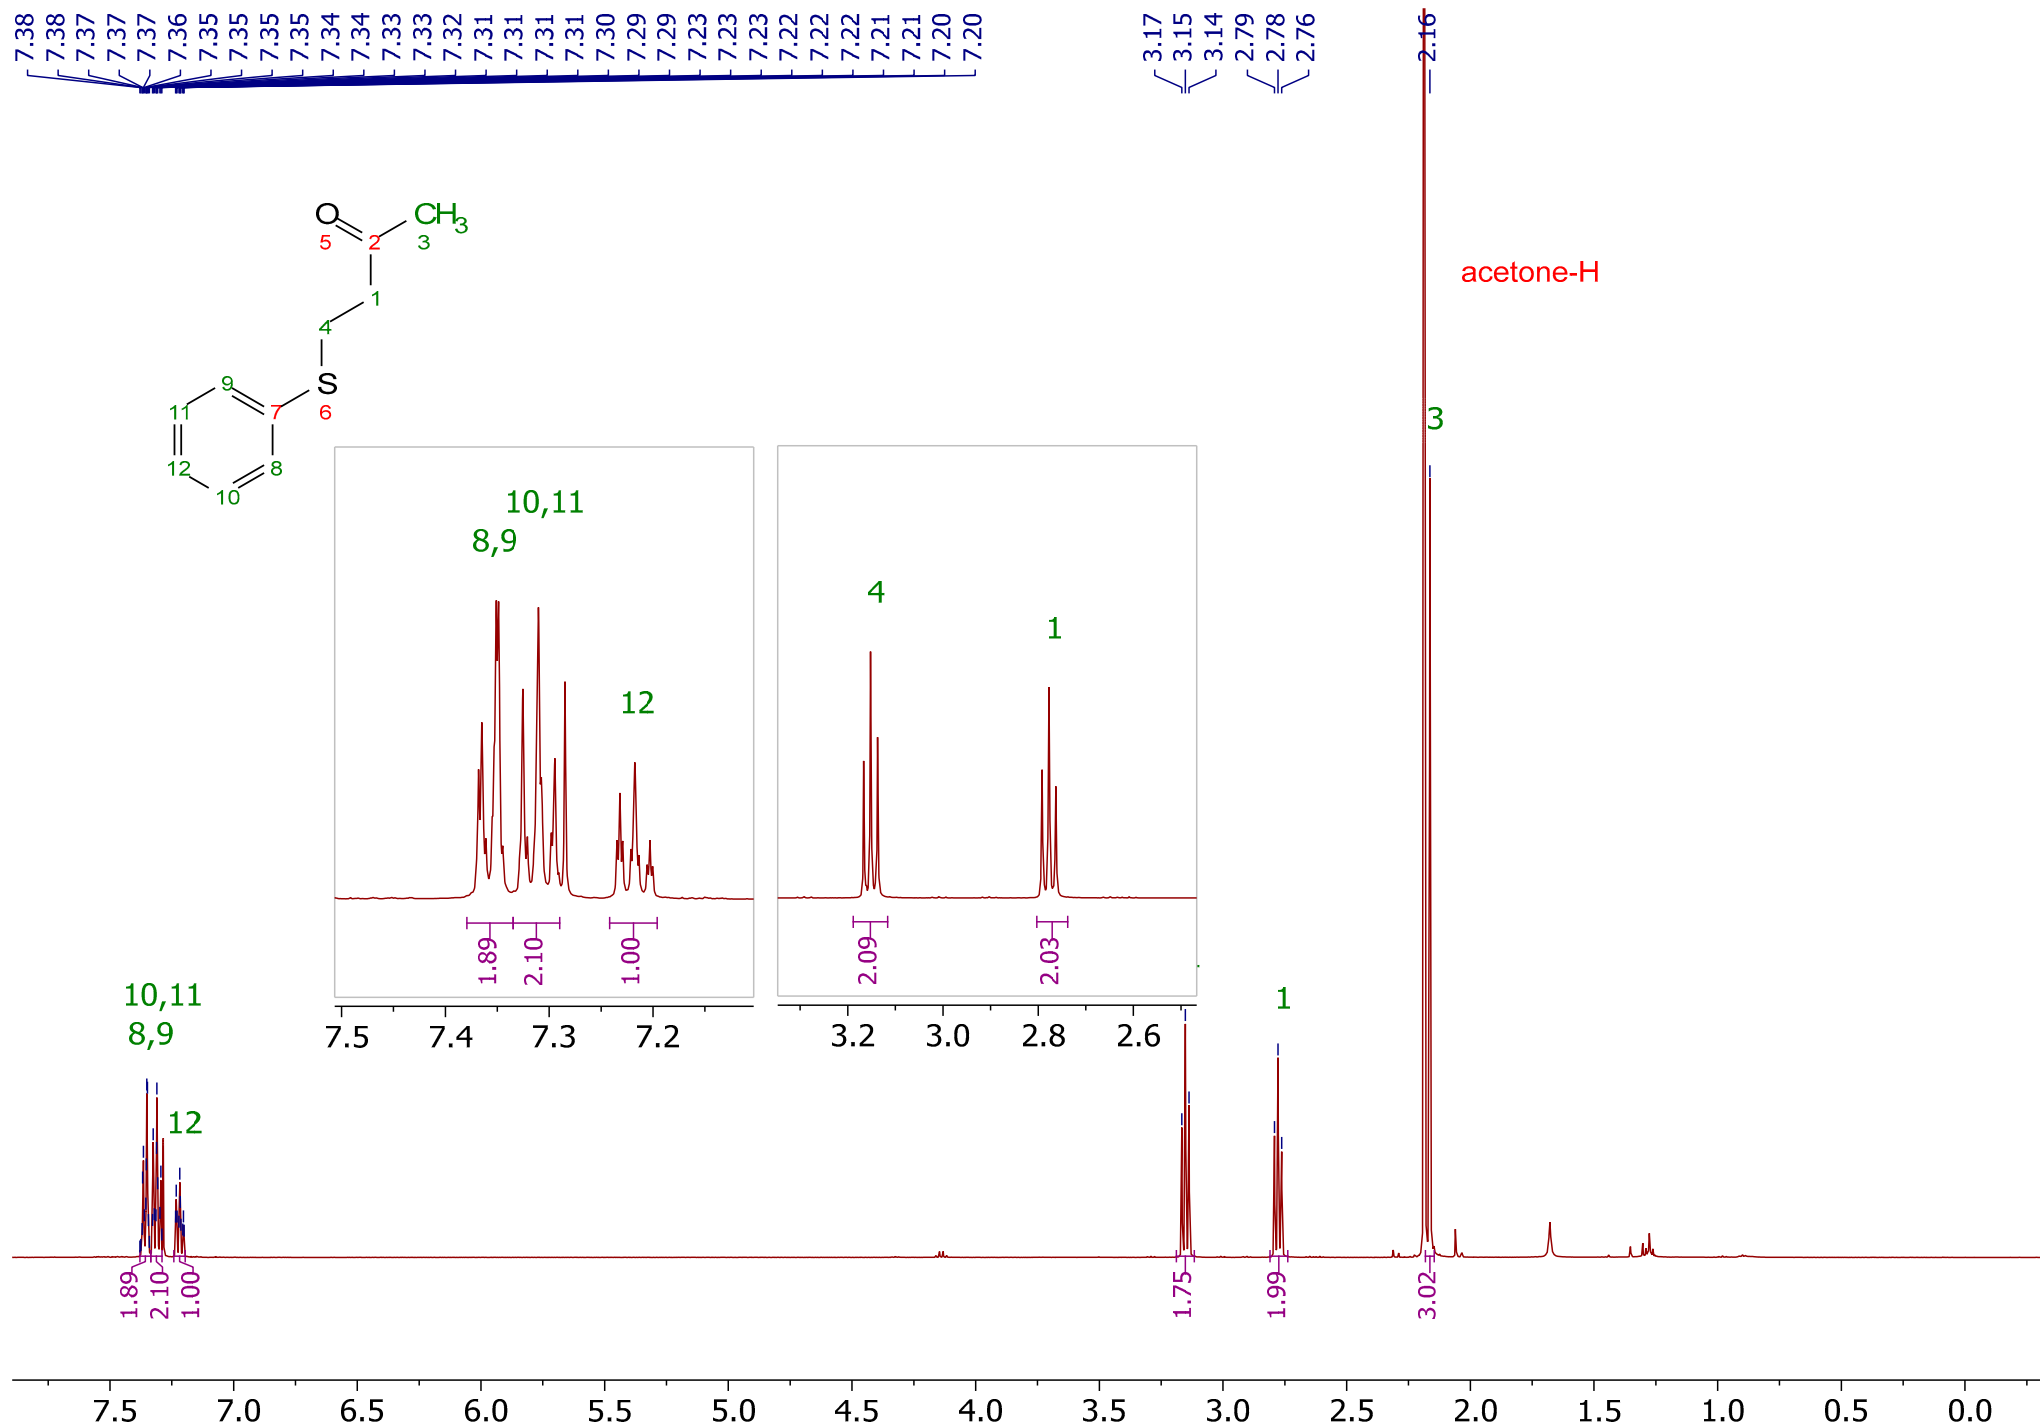

**(3f) 3-(phenylthio)cyclopentan-1-one**

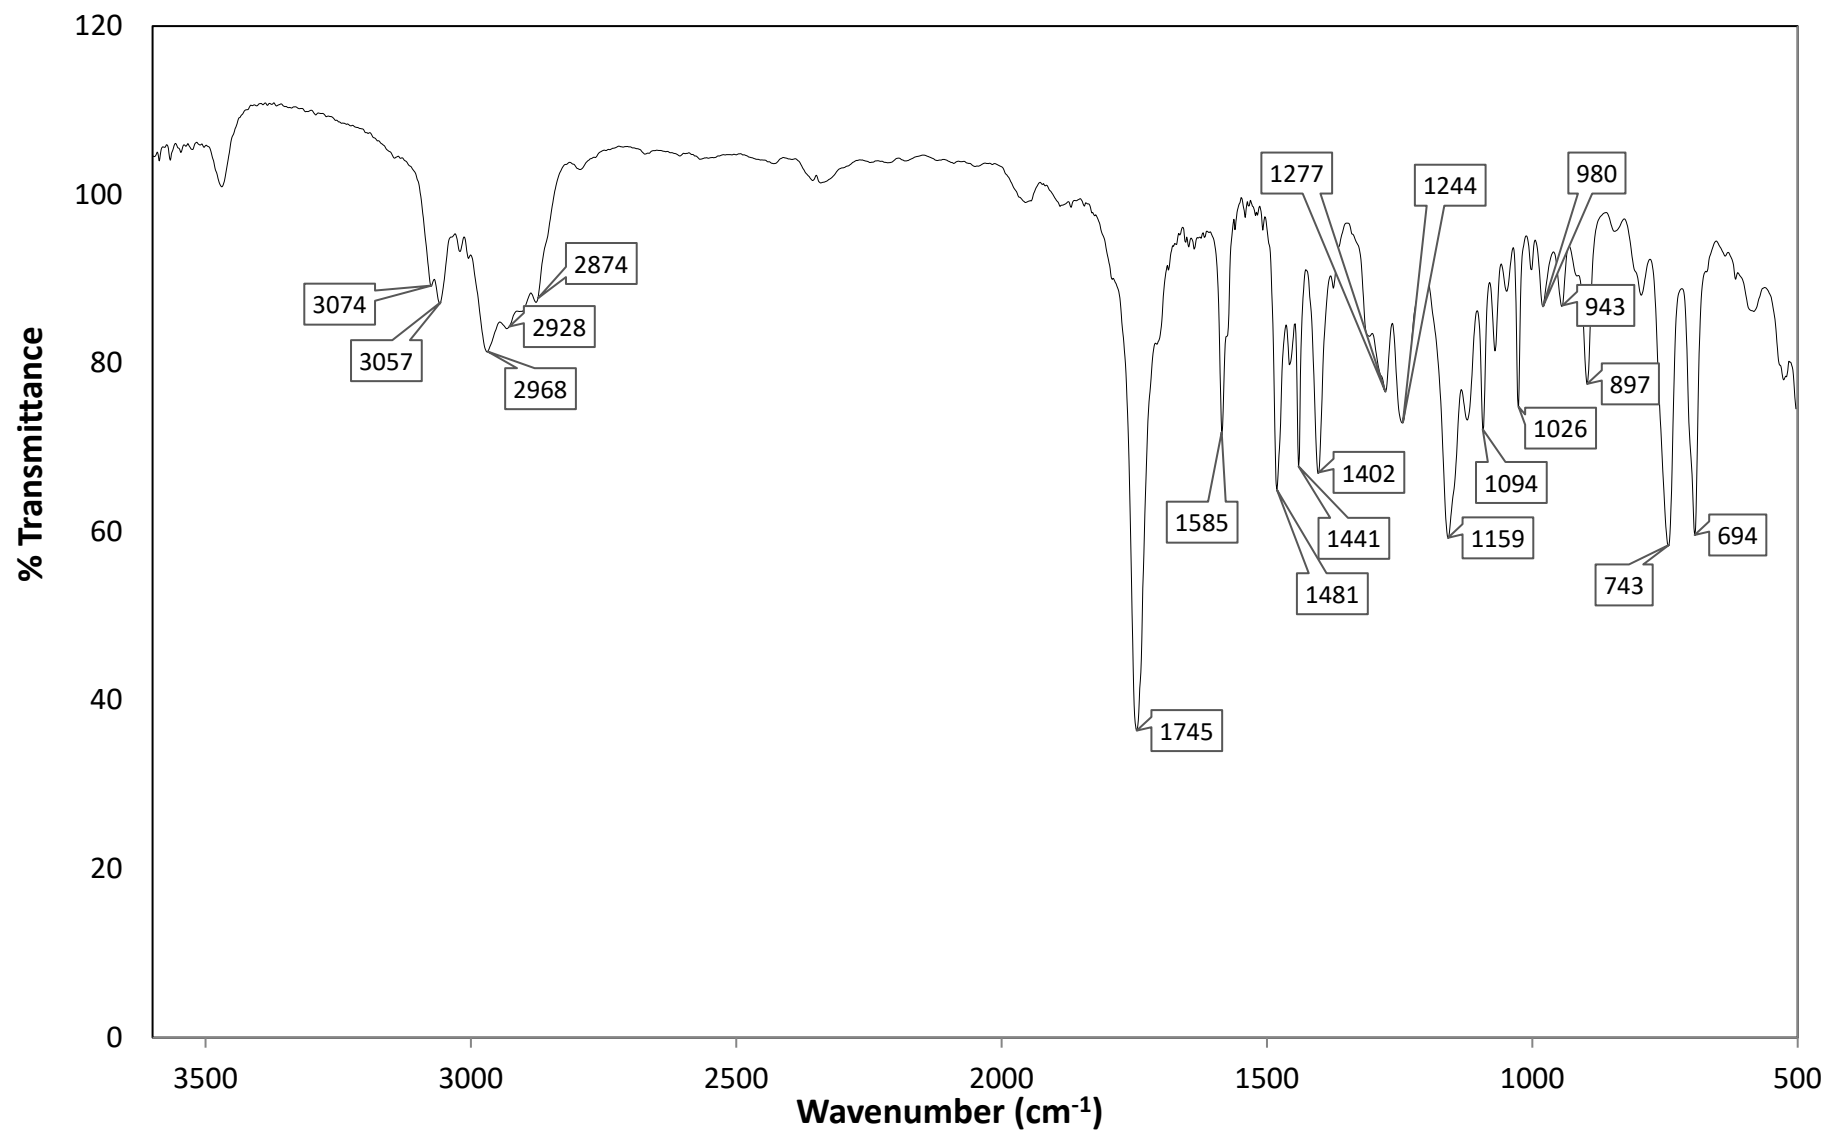

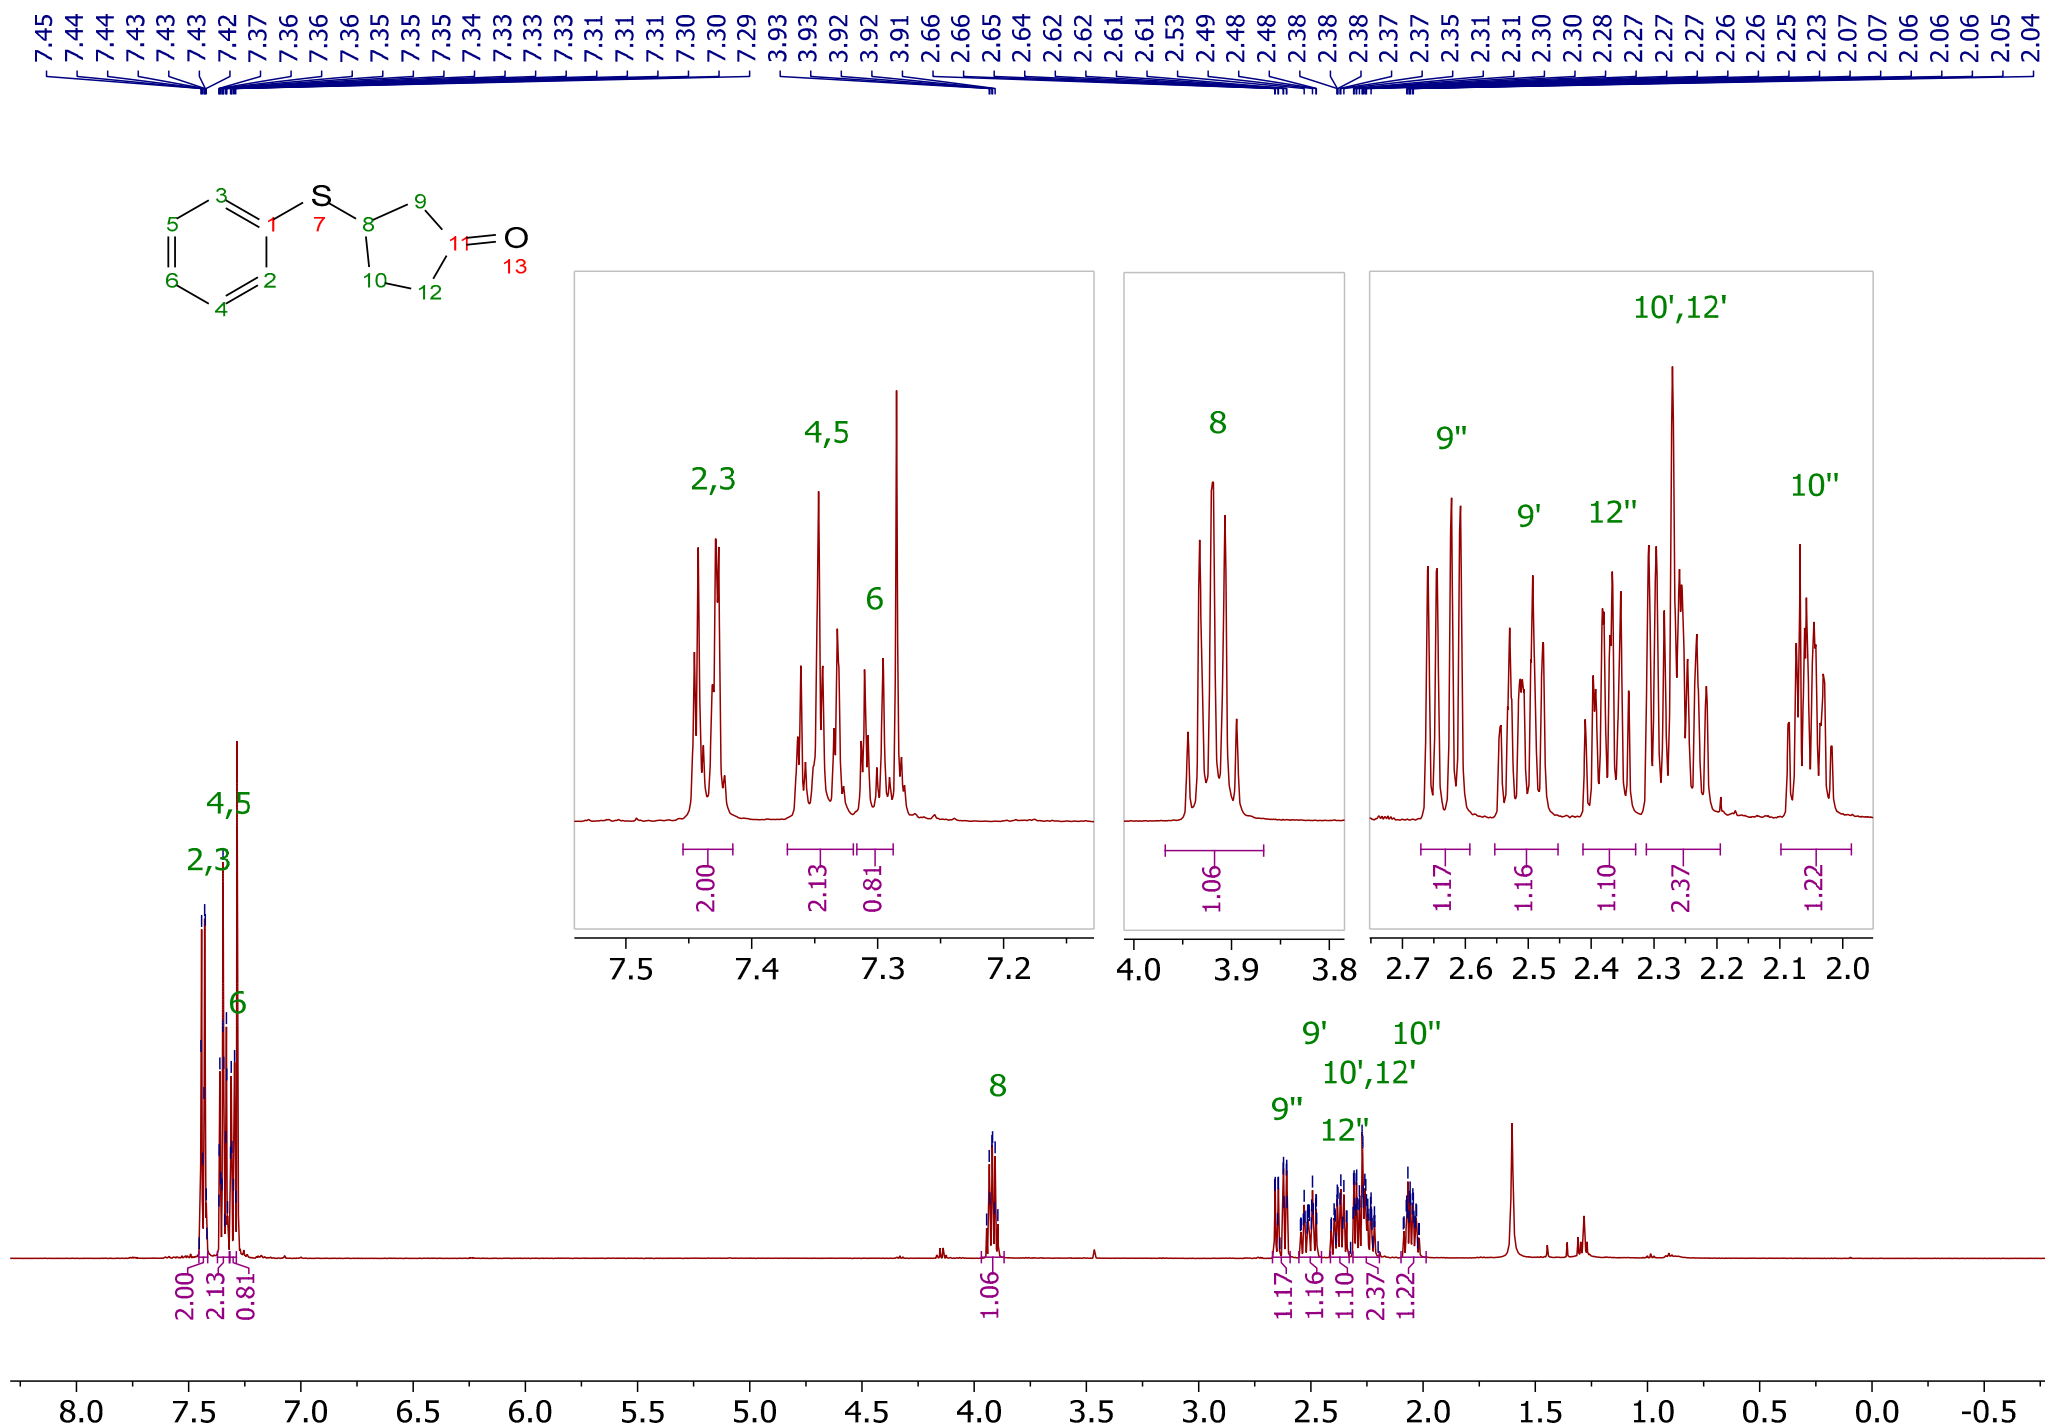

**(3g) 3-((3-ethoxy-3-oxopropyl)thio) propanoic acid**

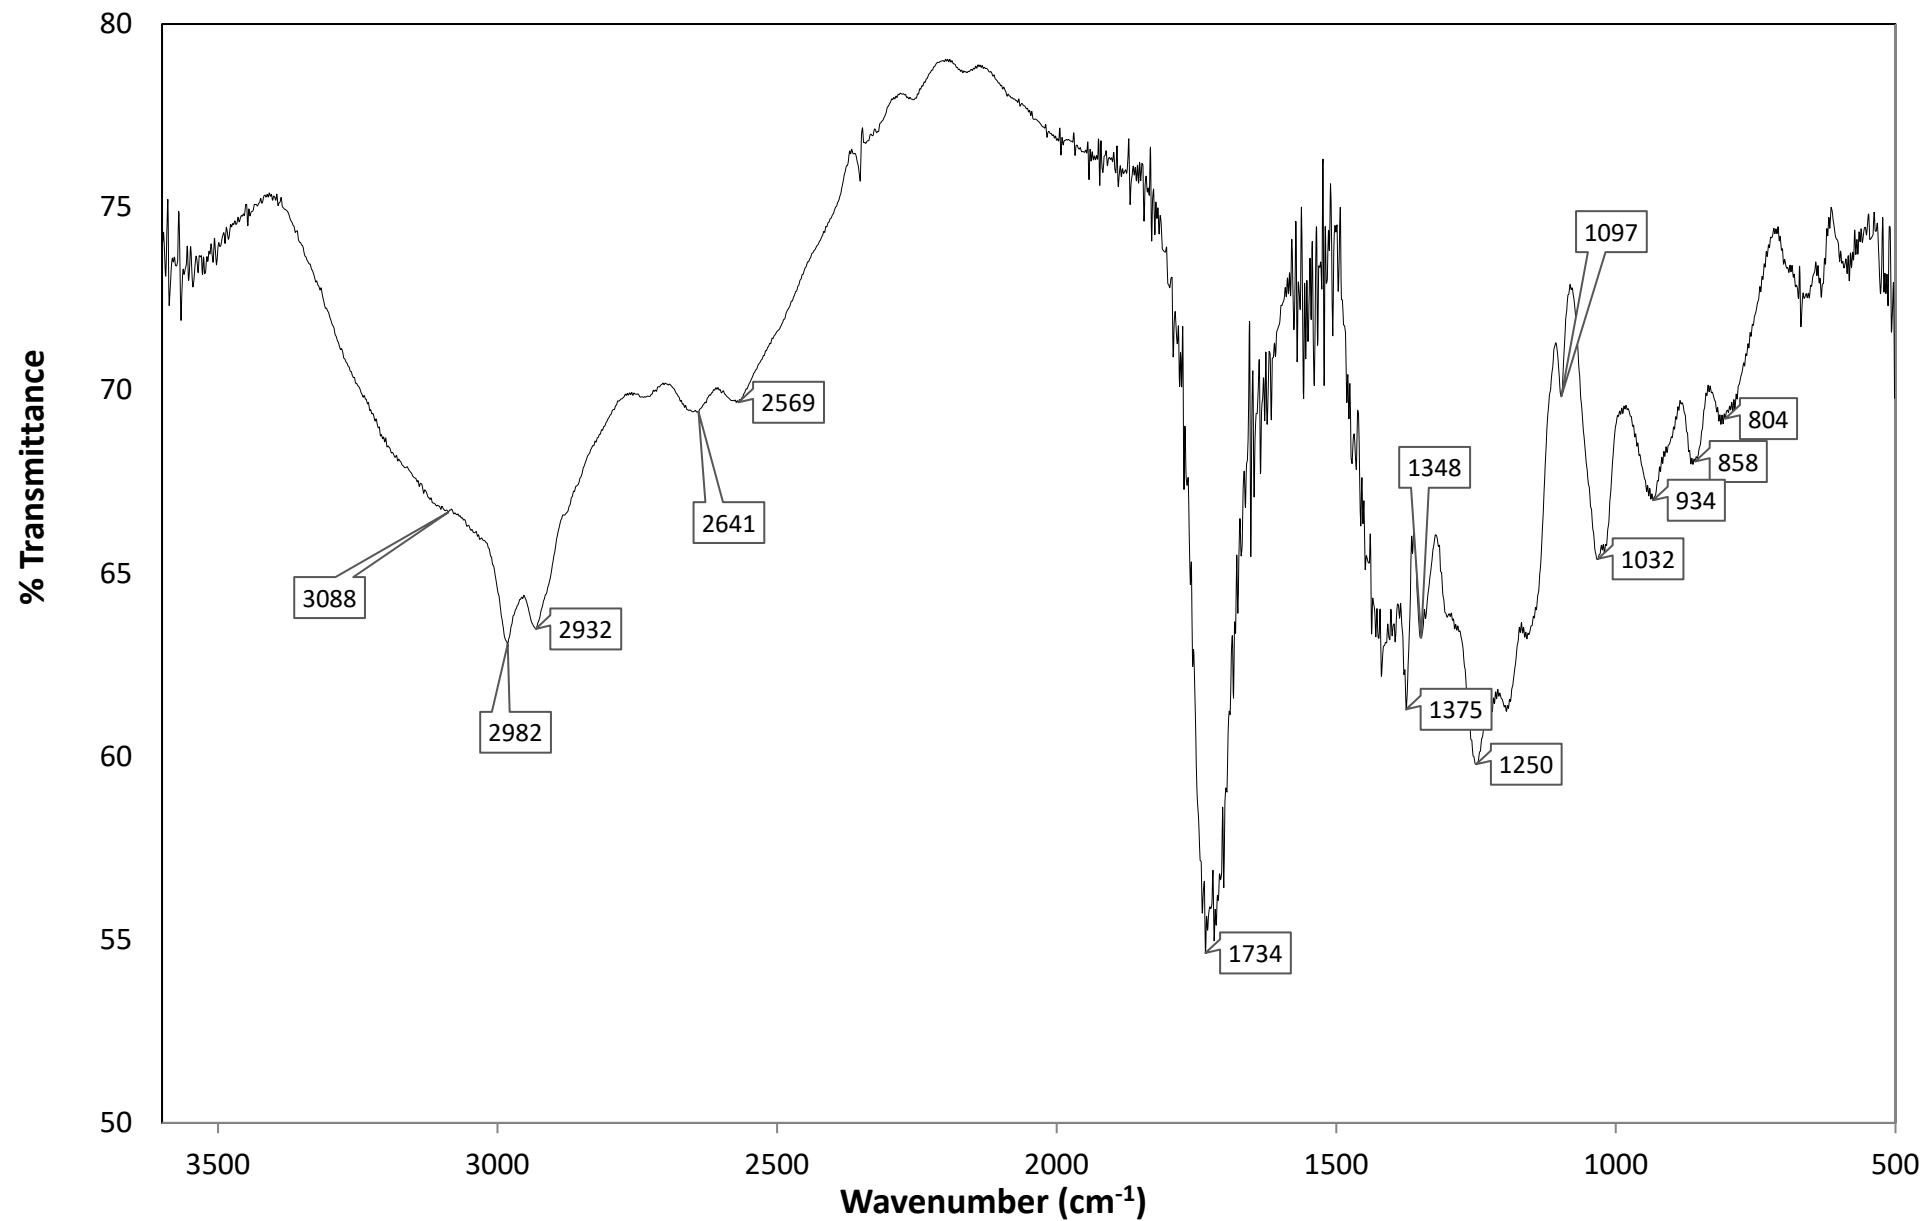

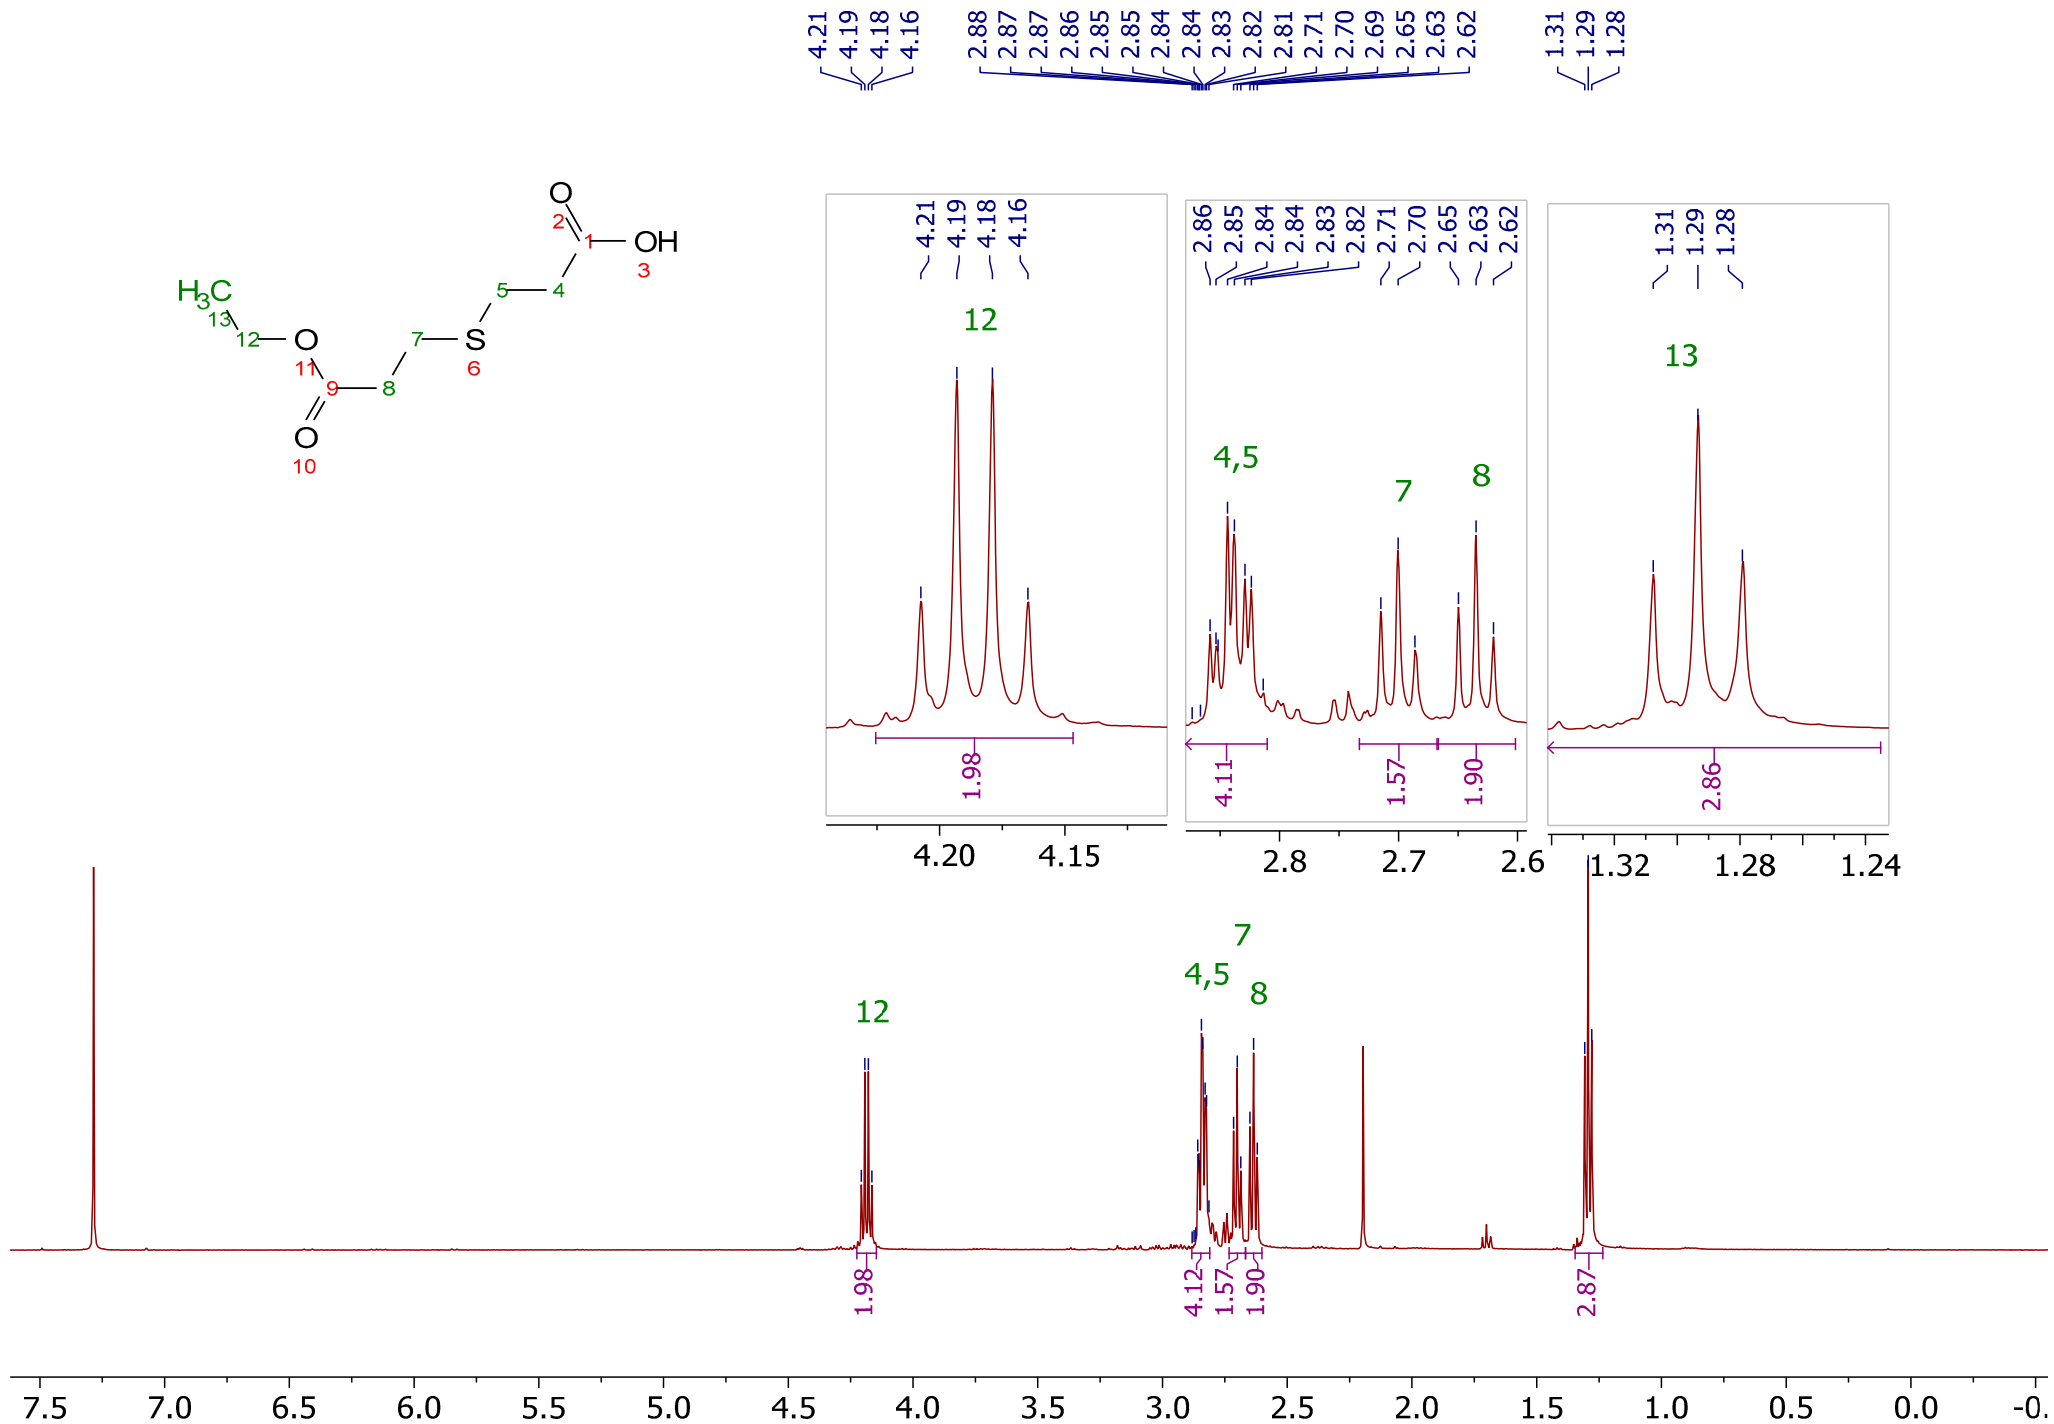

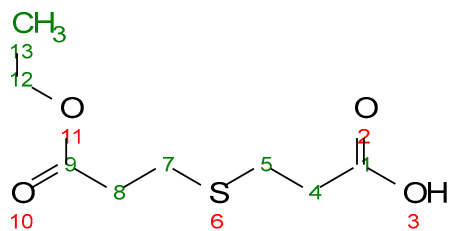

— 177.43  
— 171.96

— 60.82

34.81  
34.62  
27.06  
26.73

— 14.19

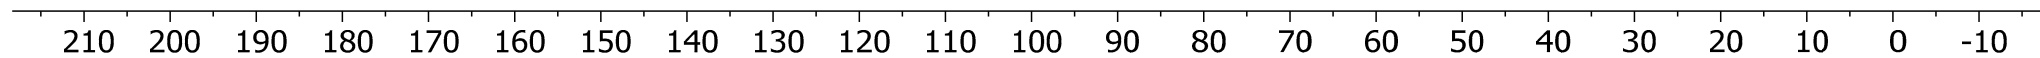

AP-15B\_1 30 (1.006)

Scan AP+  
1.34e8

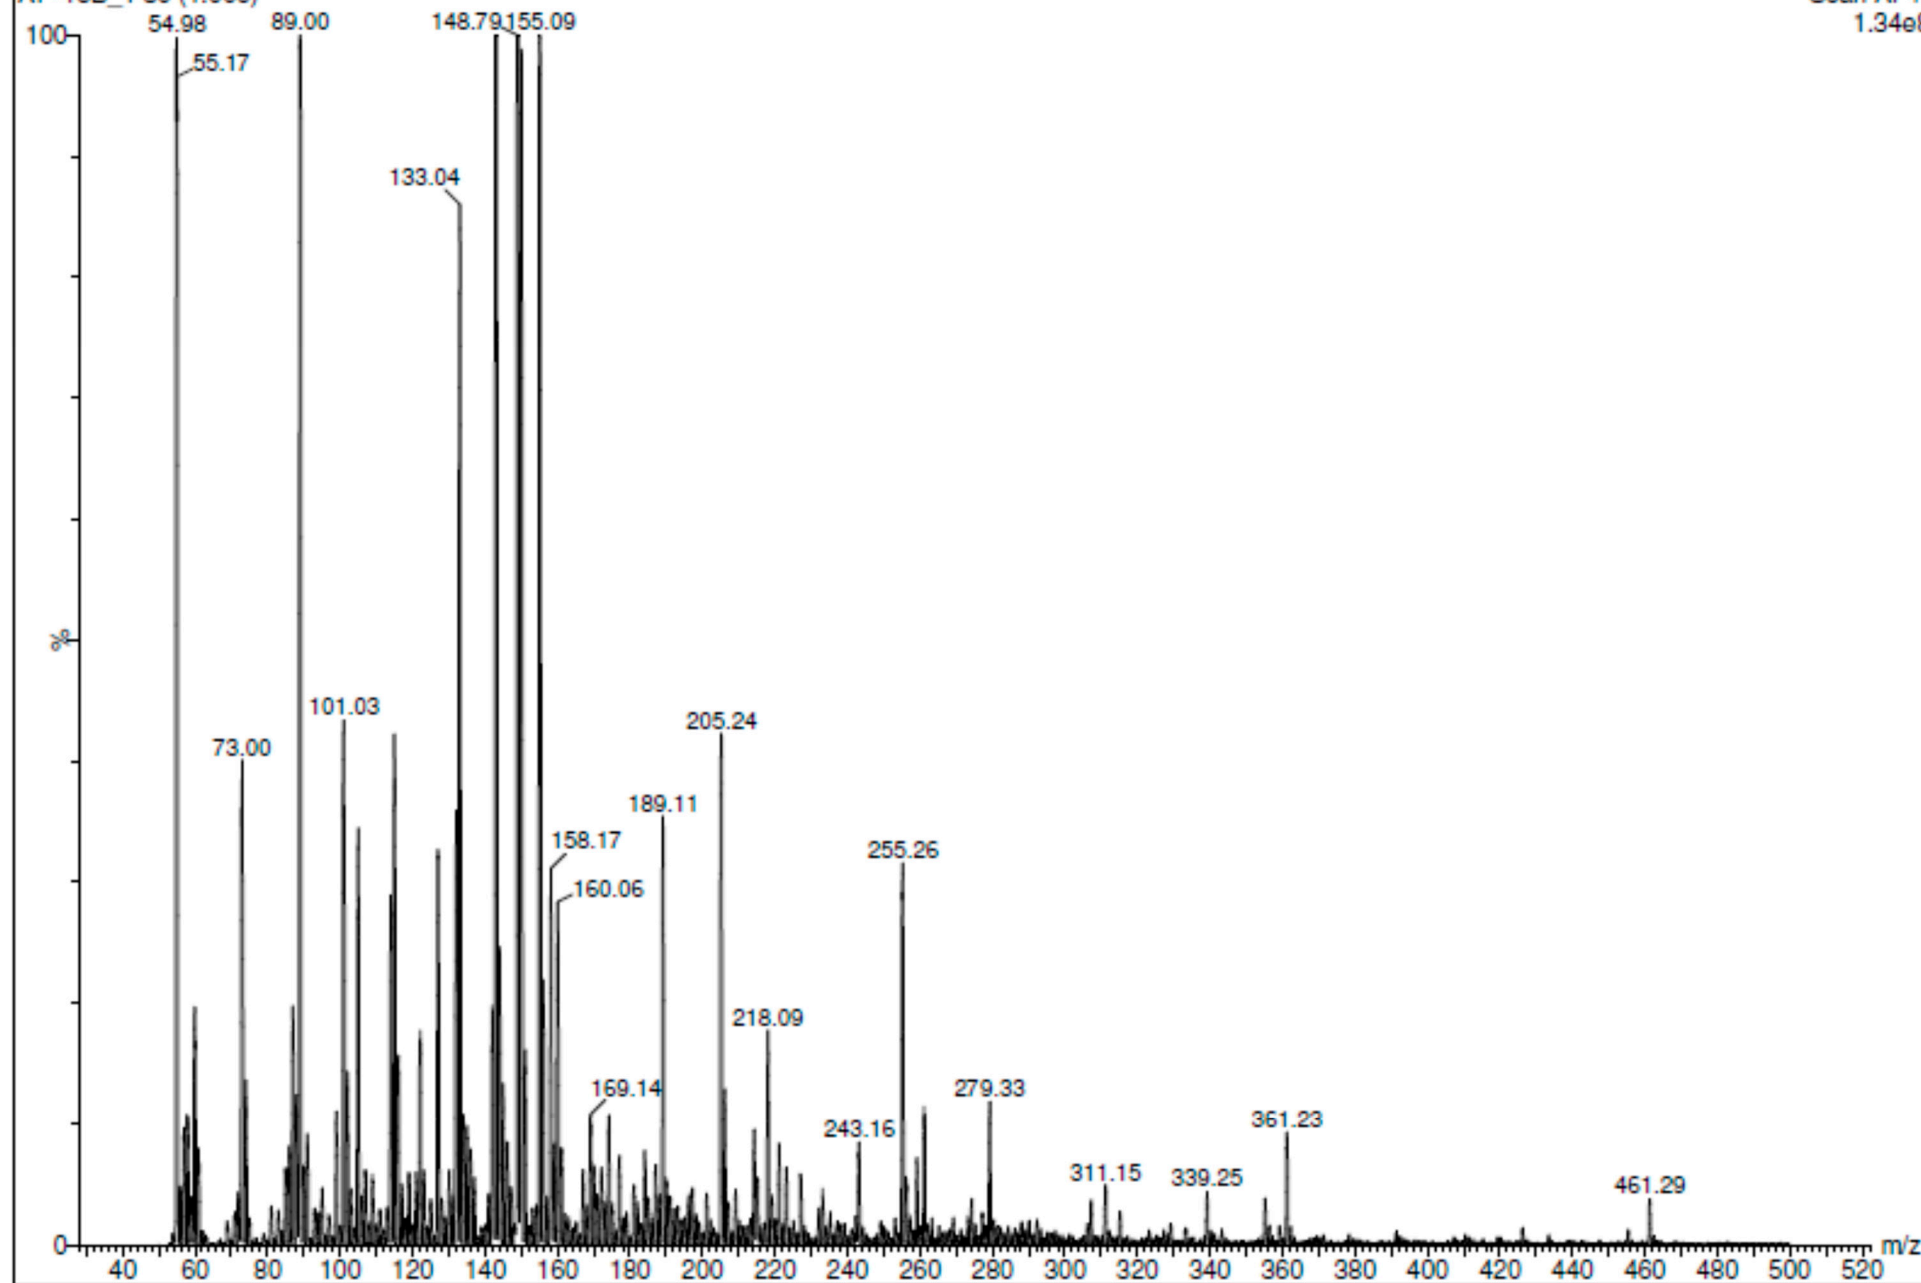

**(3h) Ethyl 3-(benzylthio)propanoate**

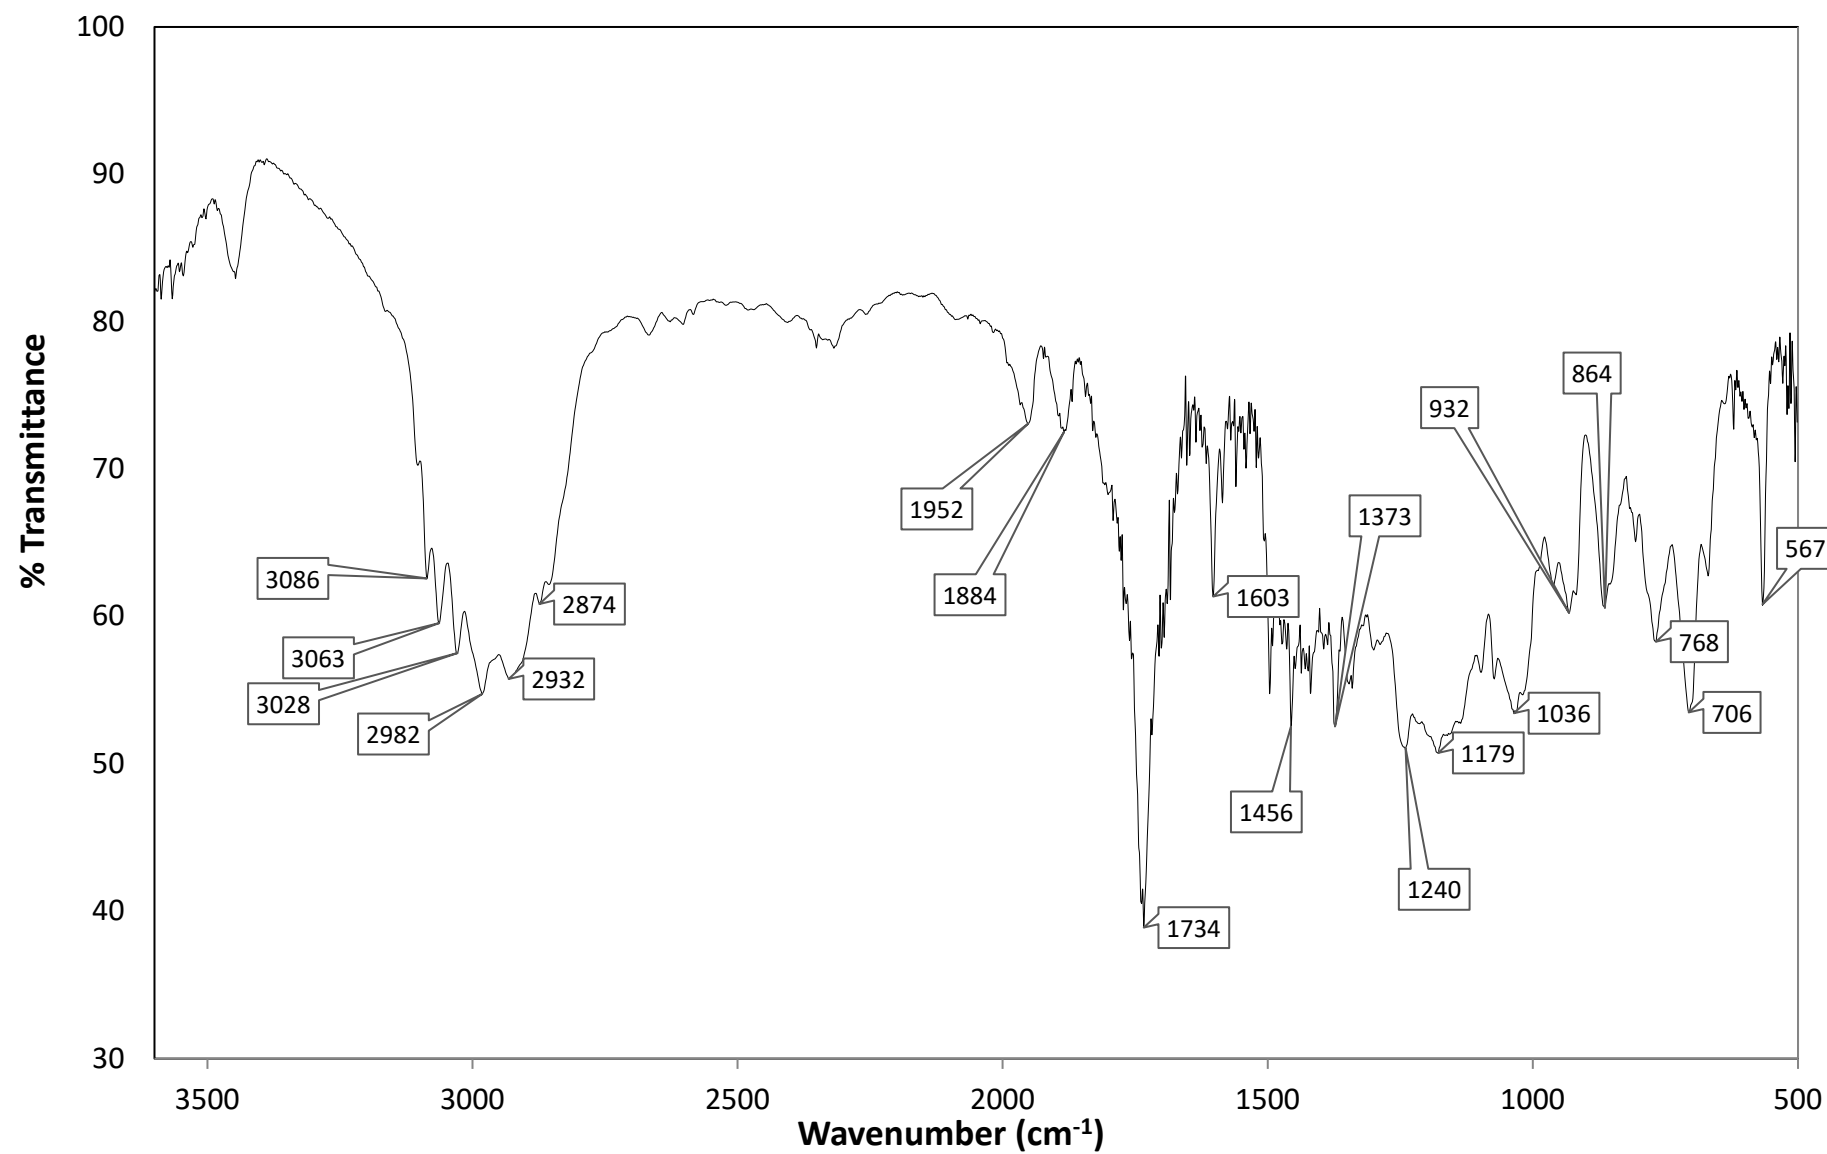

7.36  
7.35  
7.34  
7.34  
7.34  
7.33  
7.32  
7.32  
7.28  
7.27  
7.27  
7.26  
7.26  
7.26  
7.25

4.19  
4.17  
4.16  
4.14  
— 3.76

2.73  
2.71  
2.70  
2.58  
2.57  
2.55

1.30  
1.29  
1.28  
1.28  
1.27  
1.27  
1.27

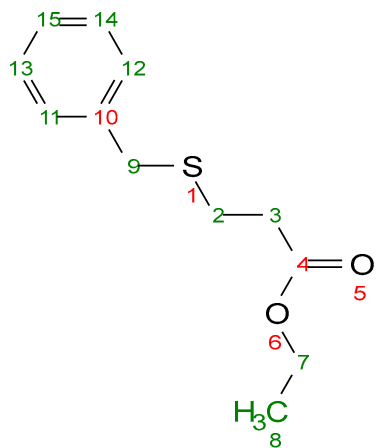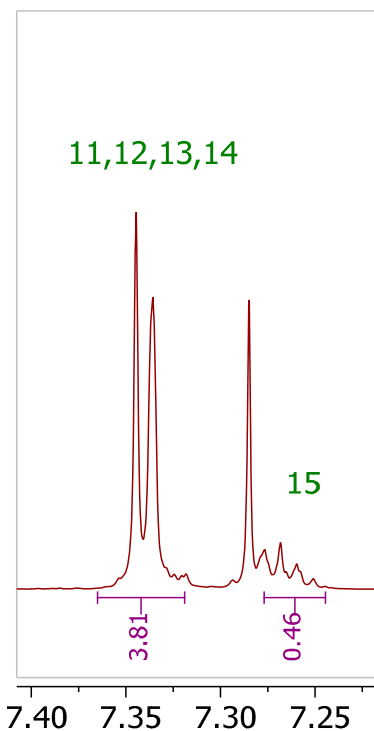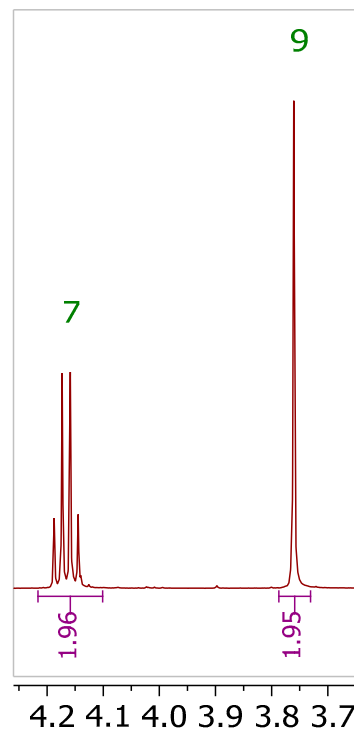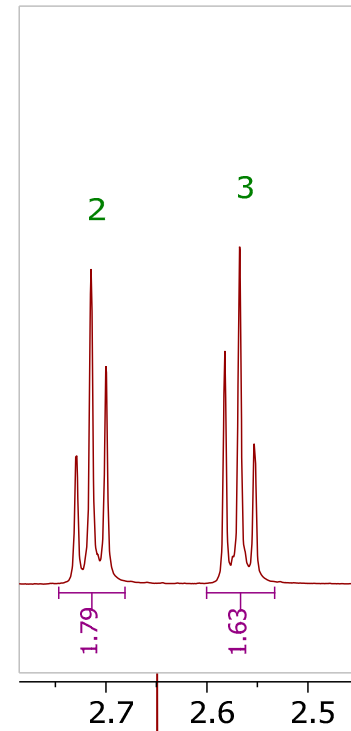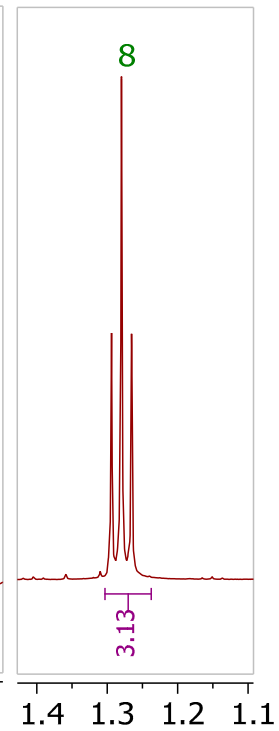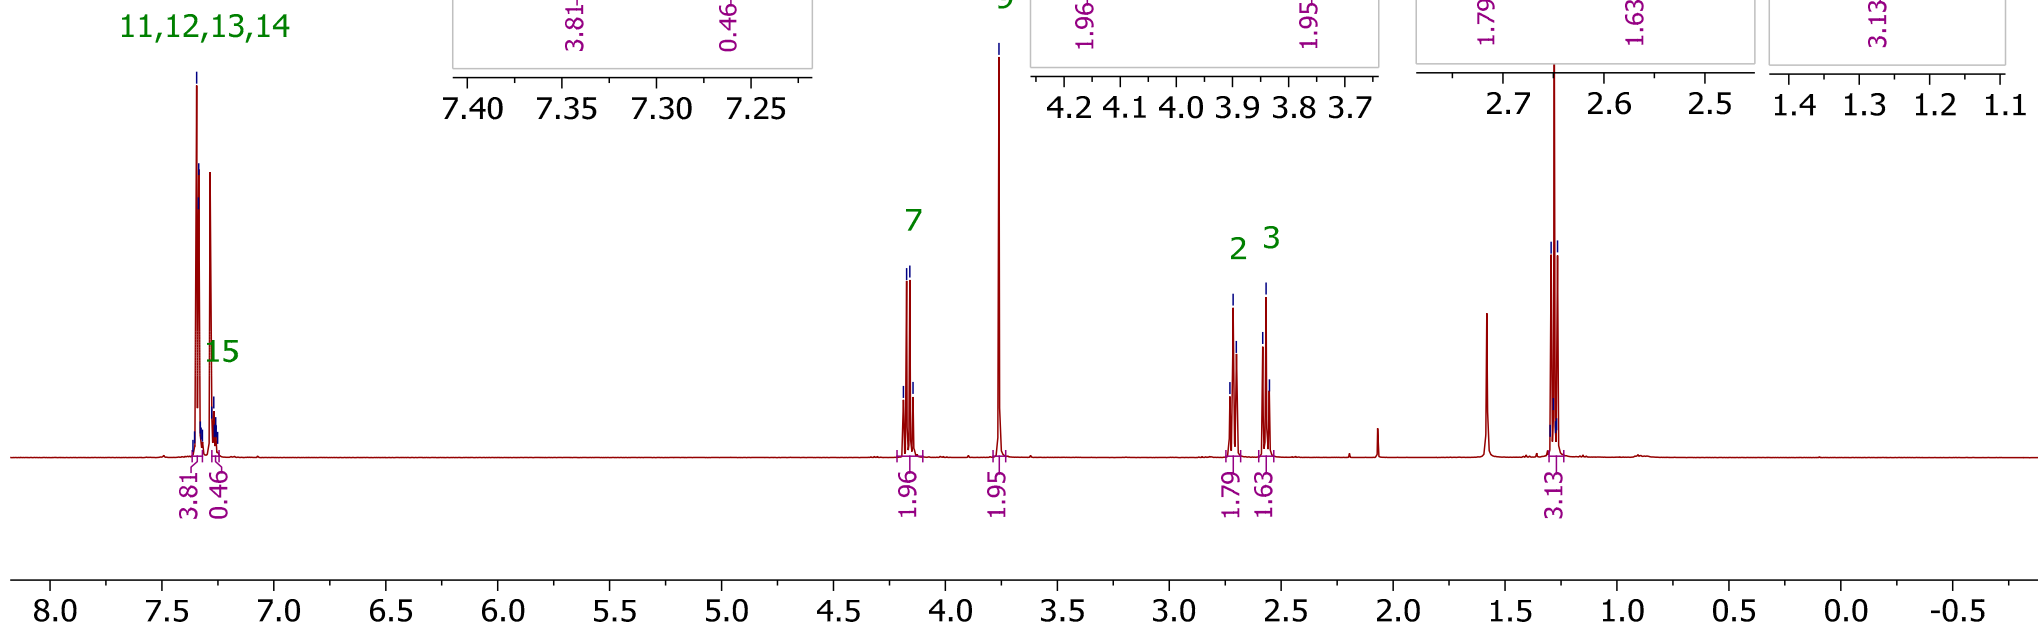

**(3i) Ethyl 3-((4-bromophenyl)thio)propanoate**

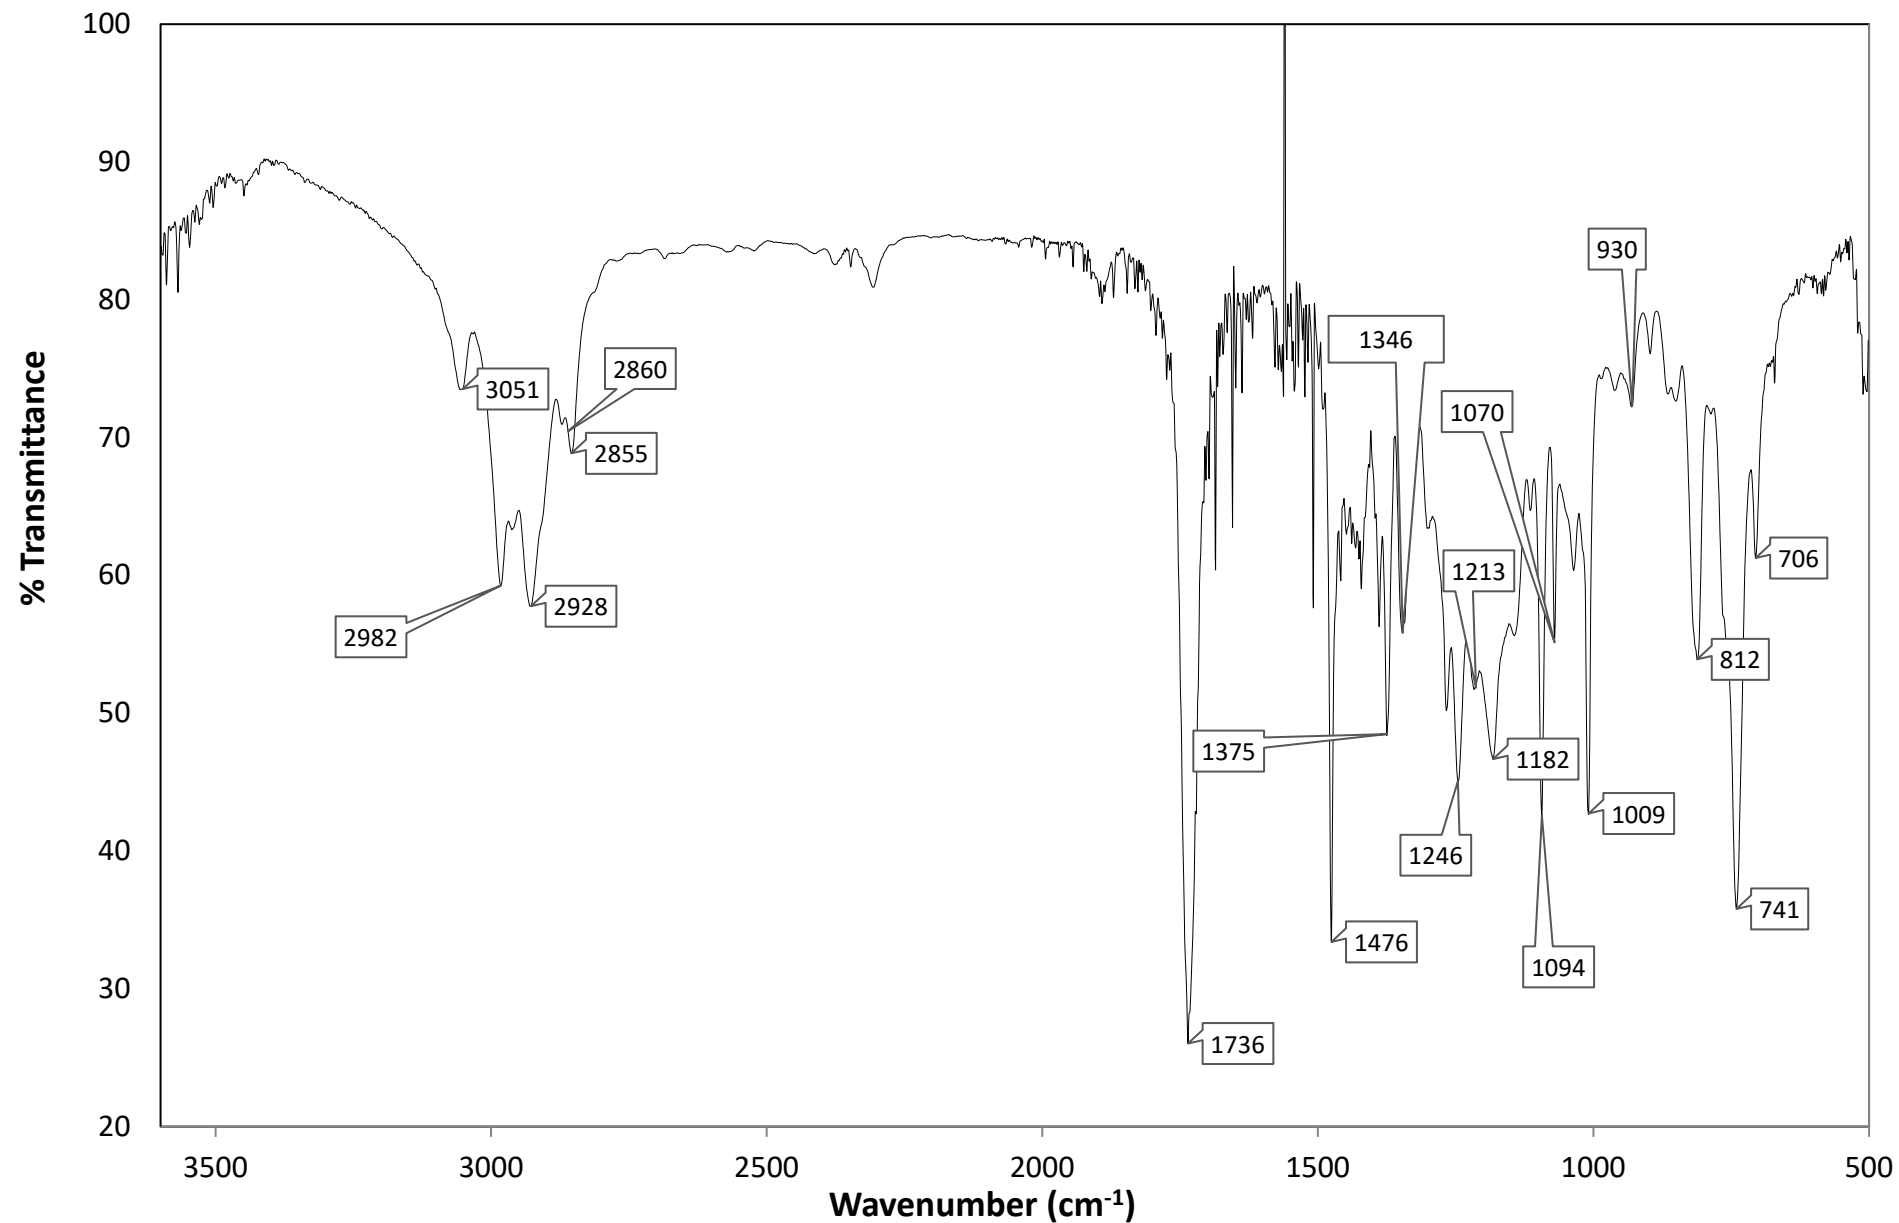

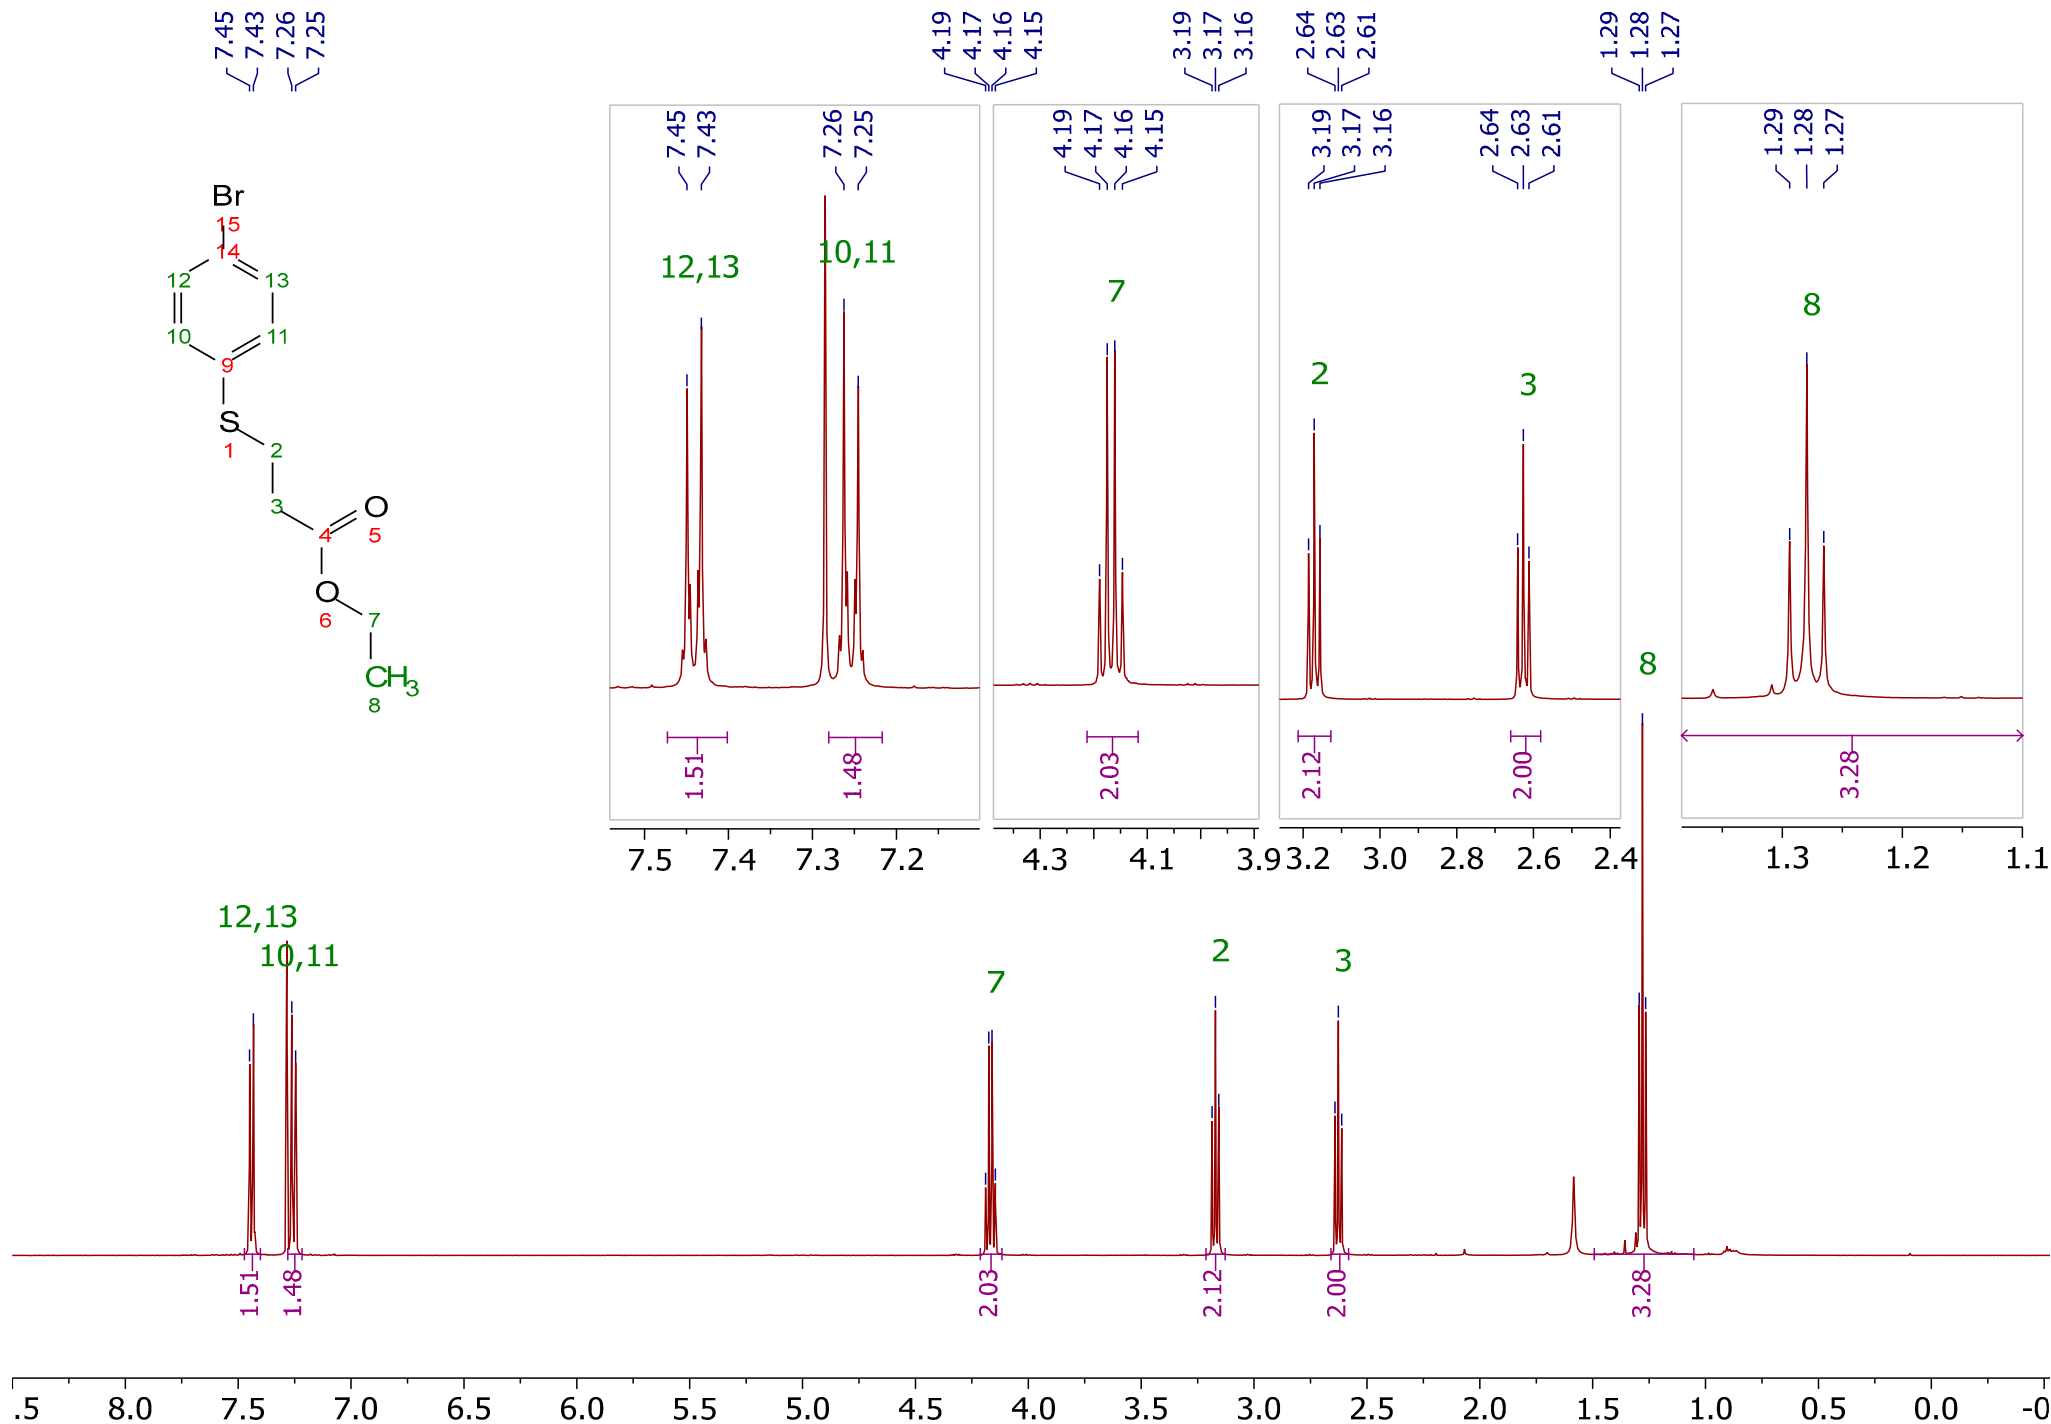

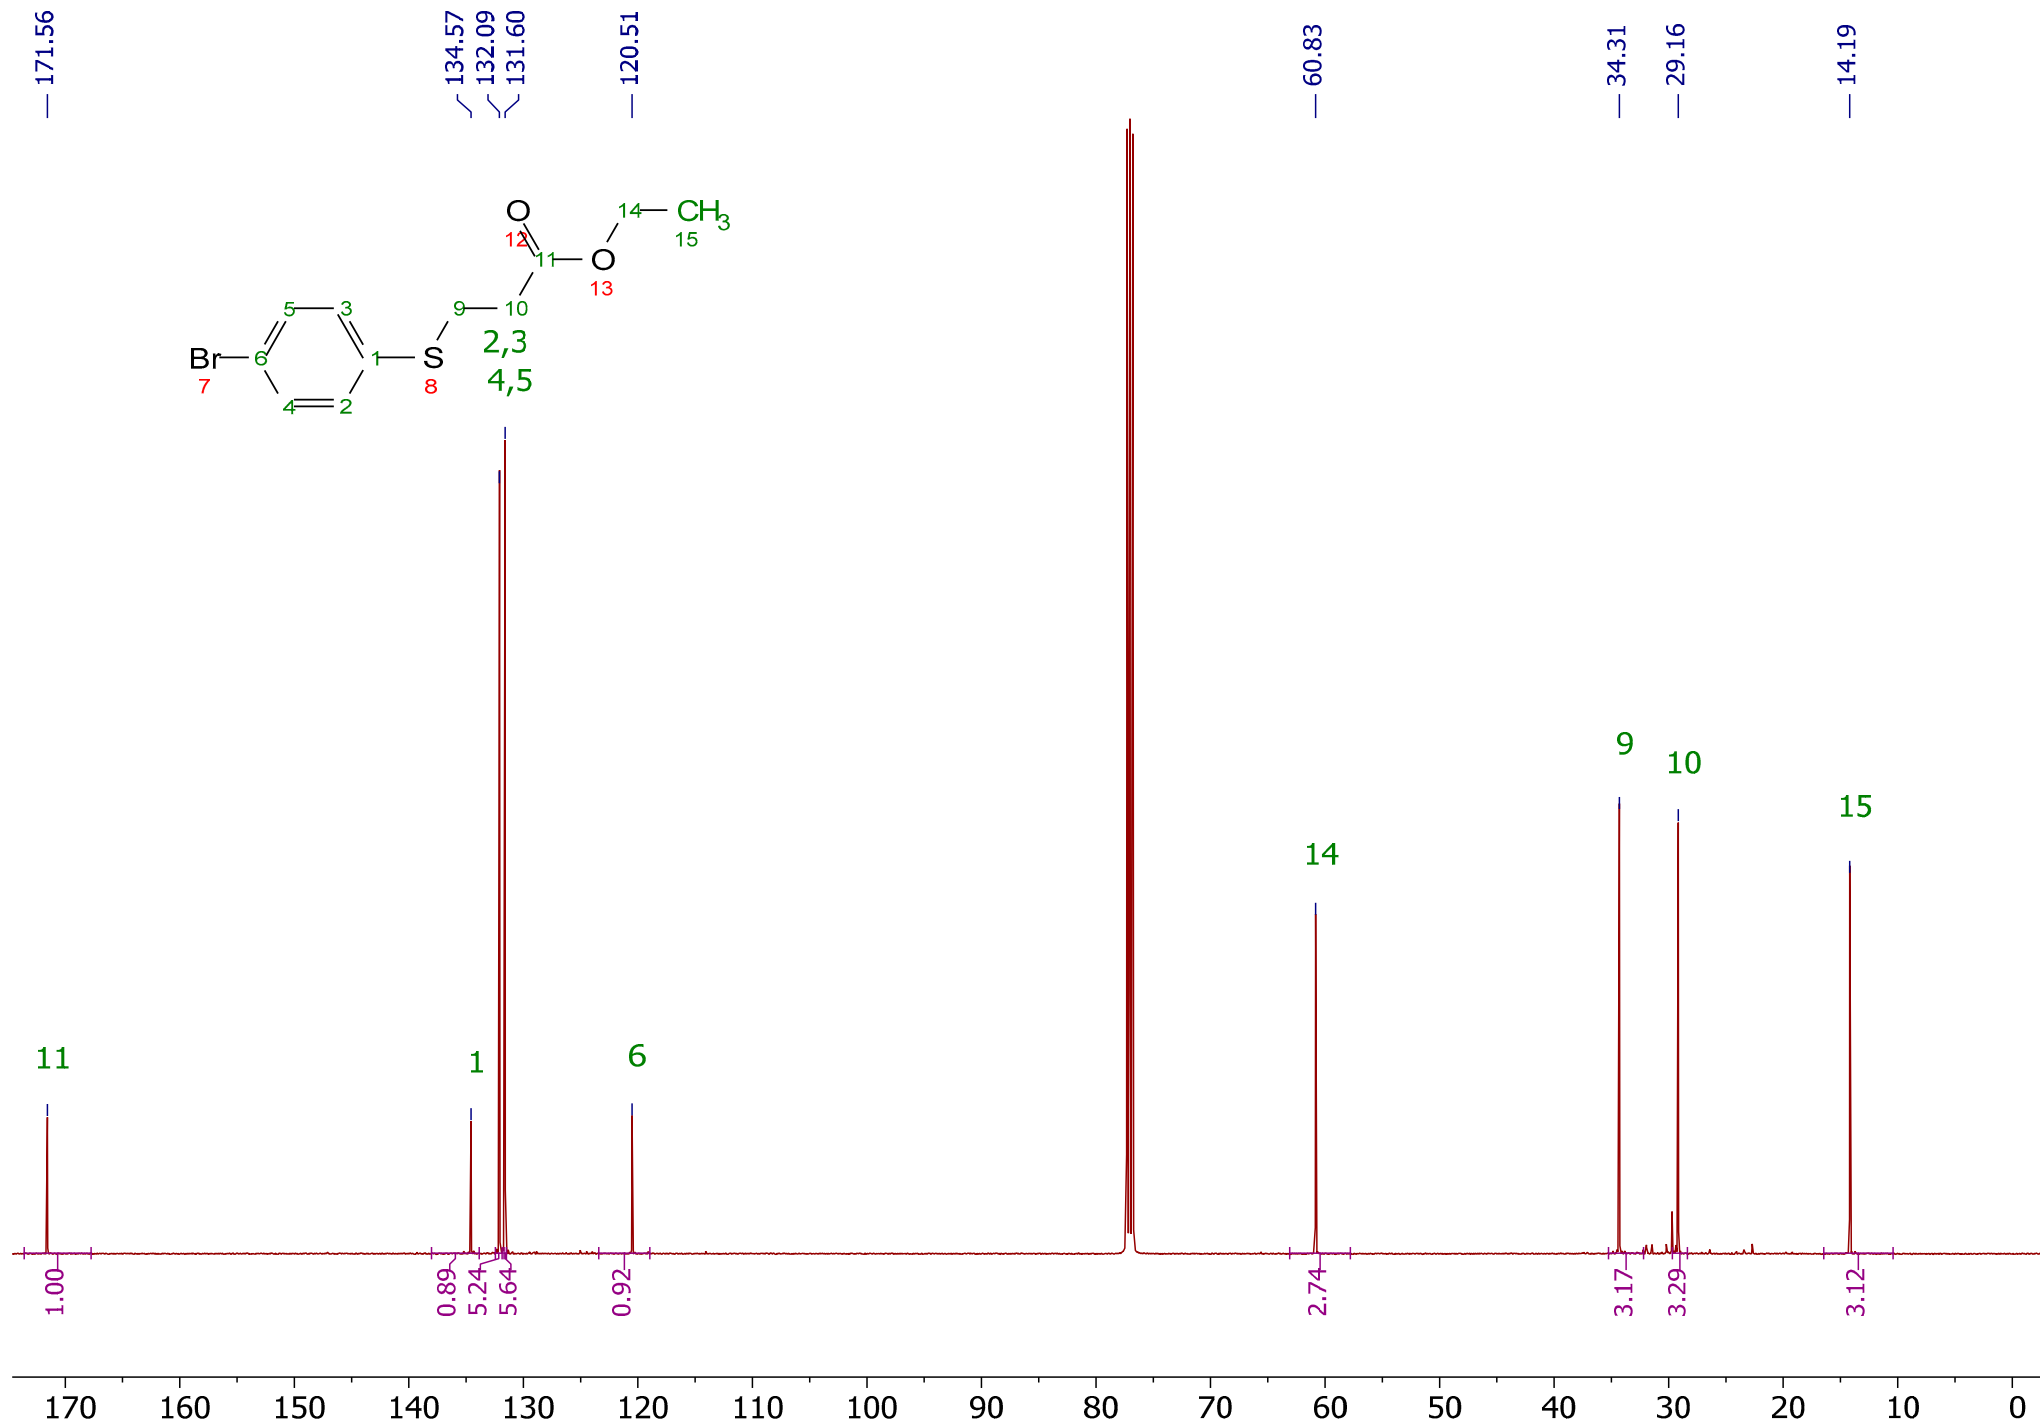

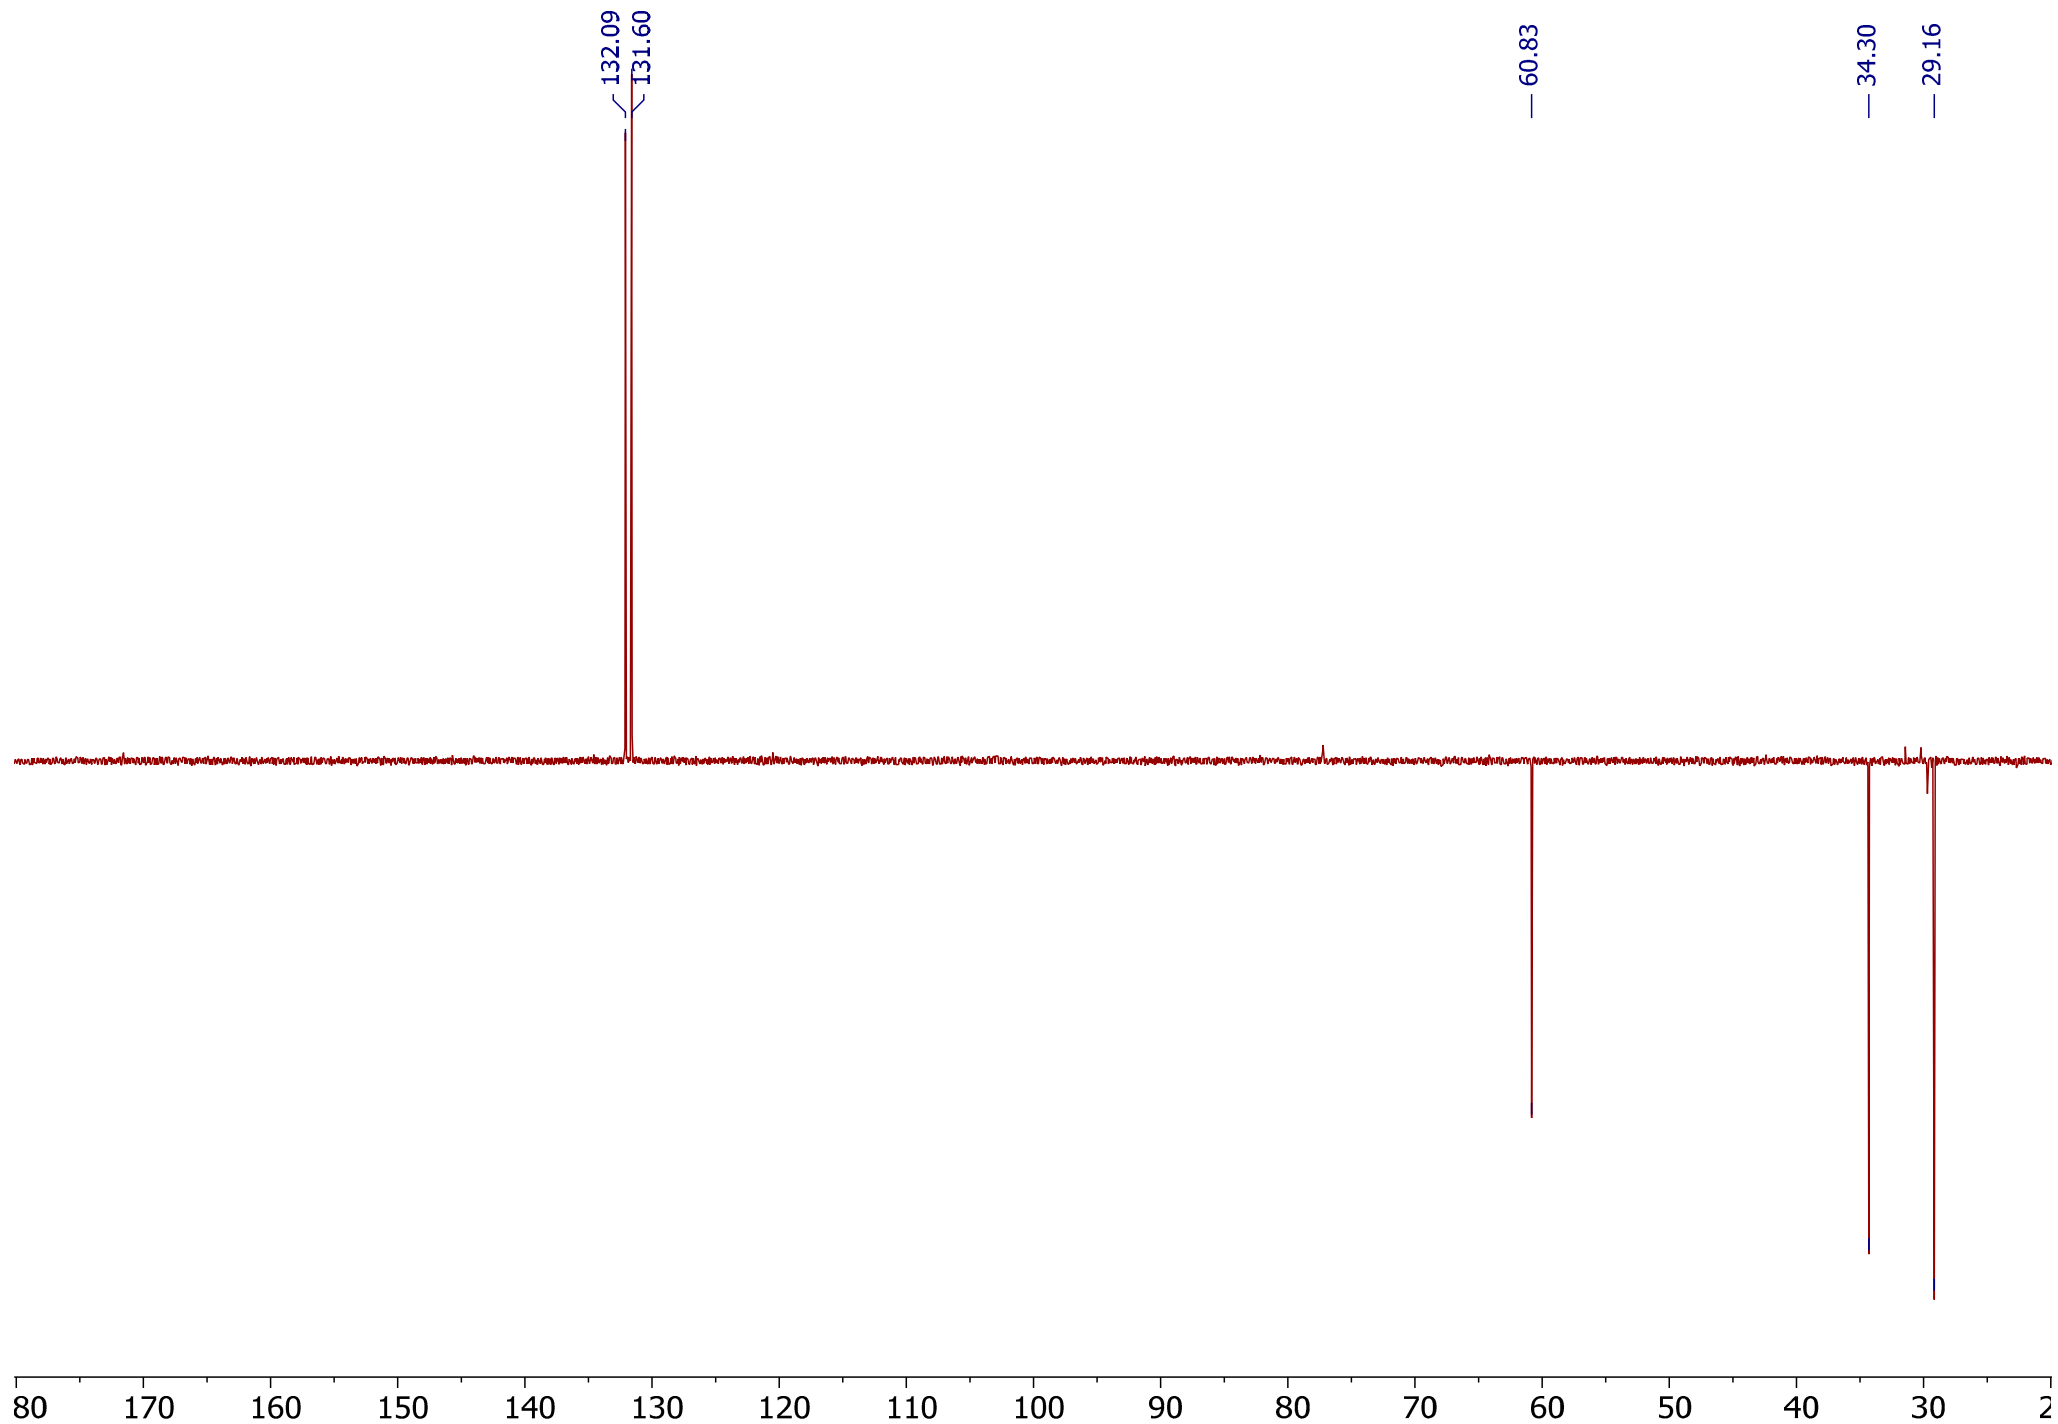

AP-18 10 (0.335) Cm (10:18)

Scan AP+  
1.29e8

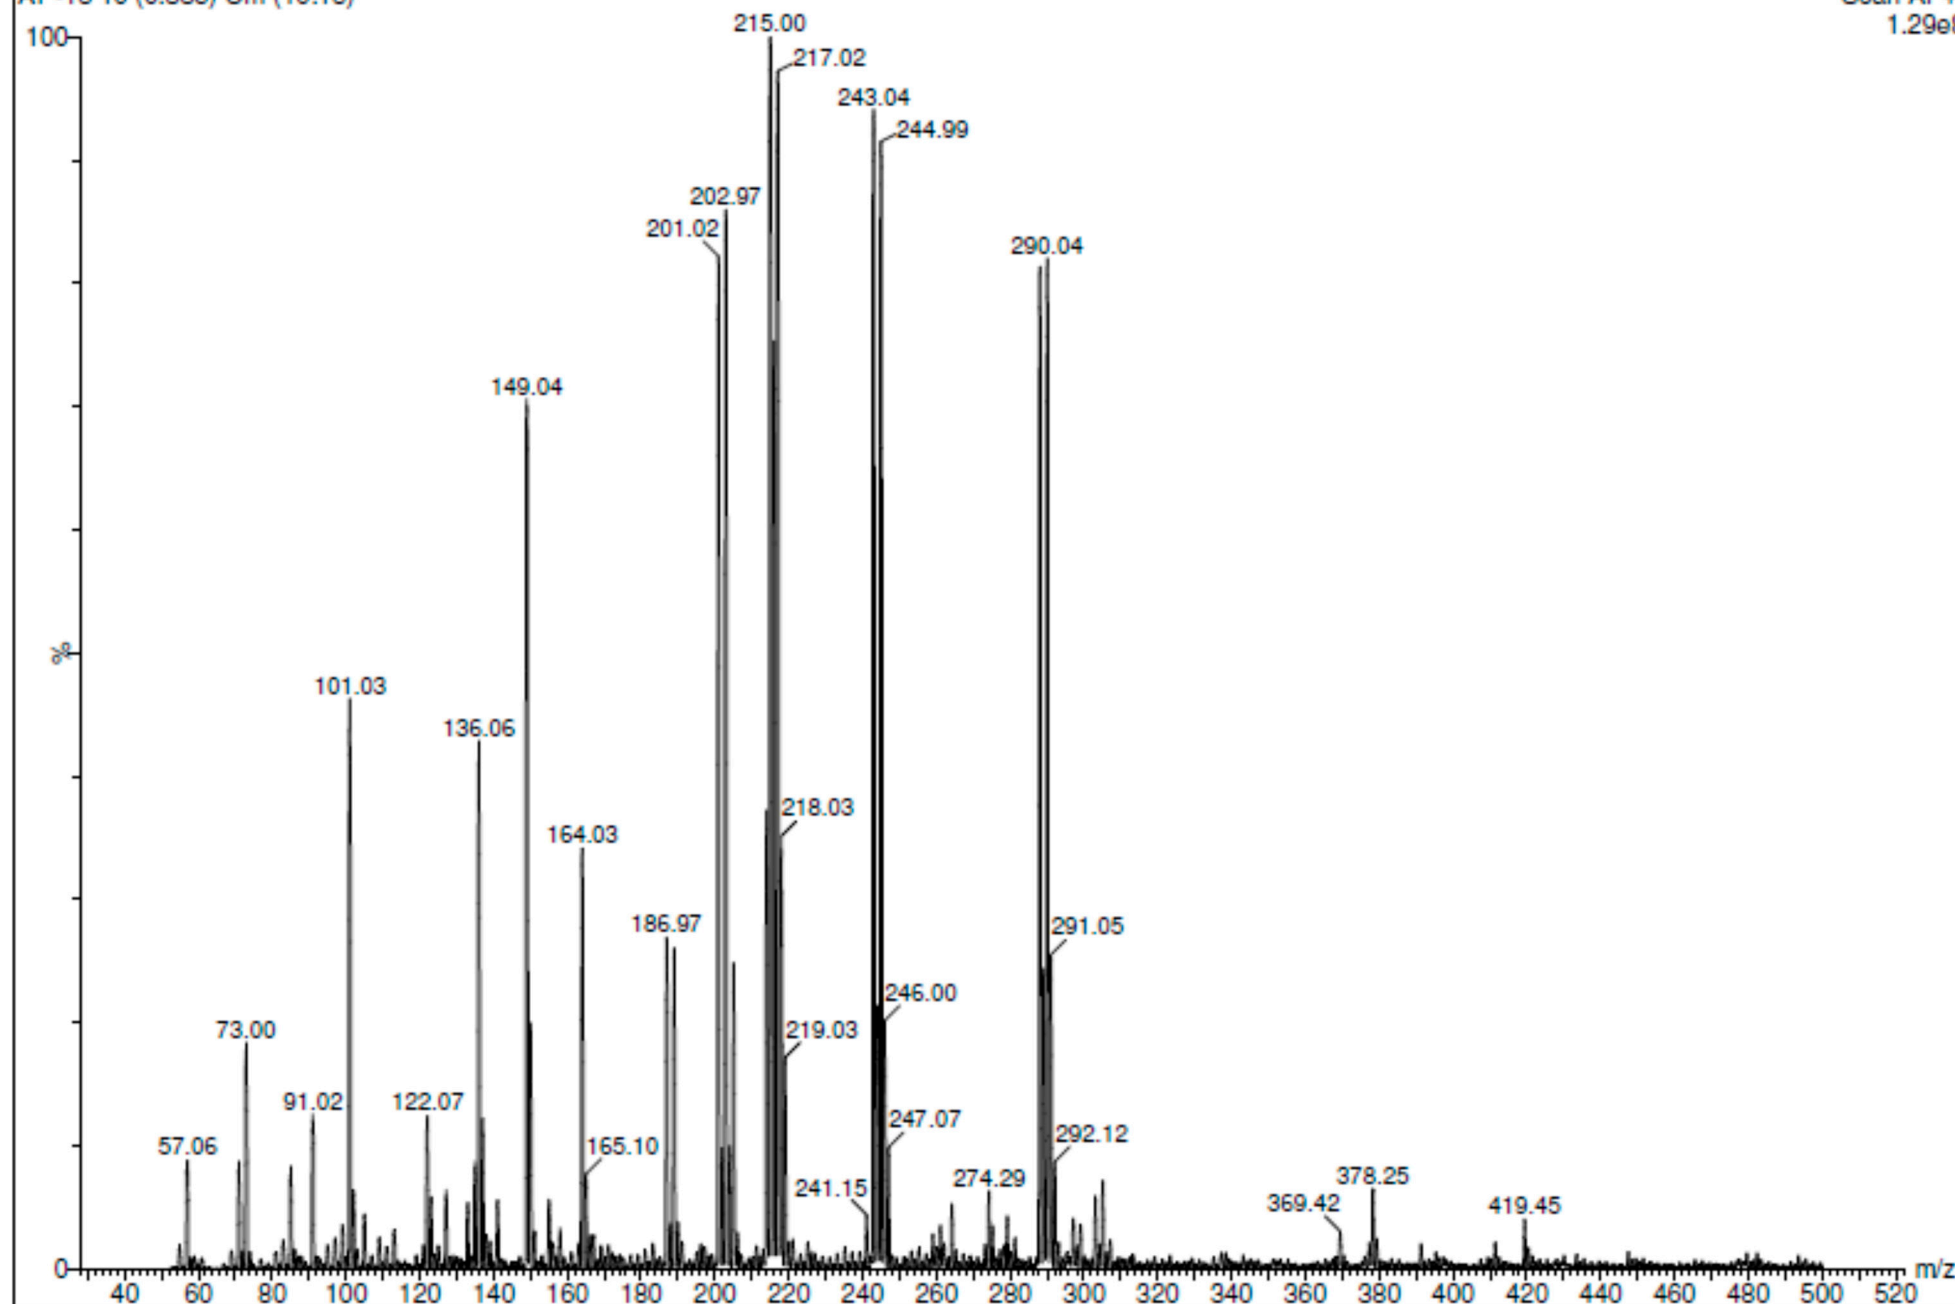

**(3i) 3-(benzylthio)propenamide**

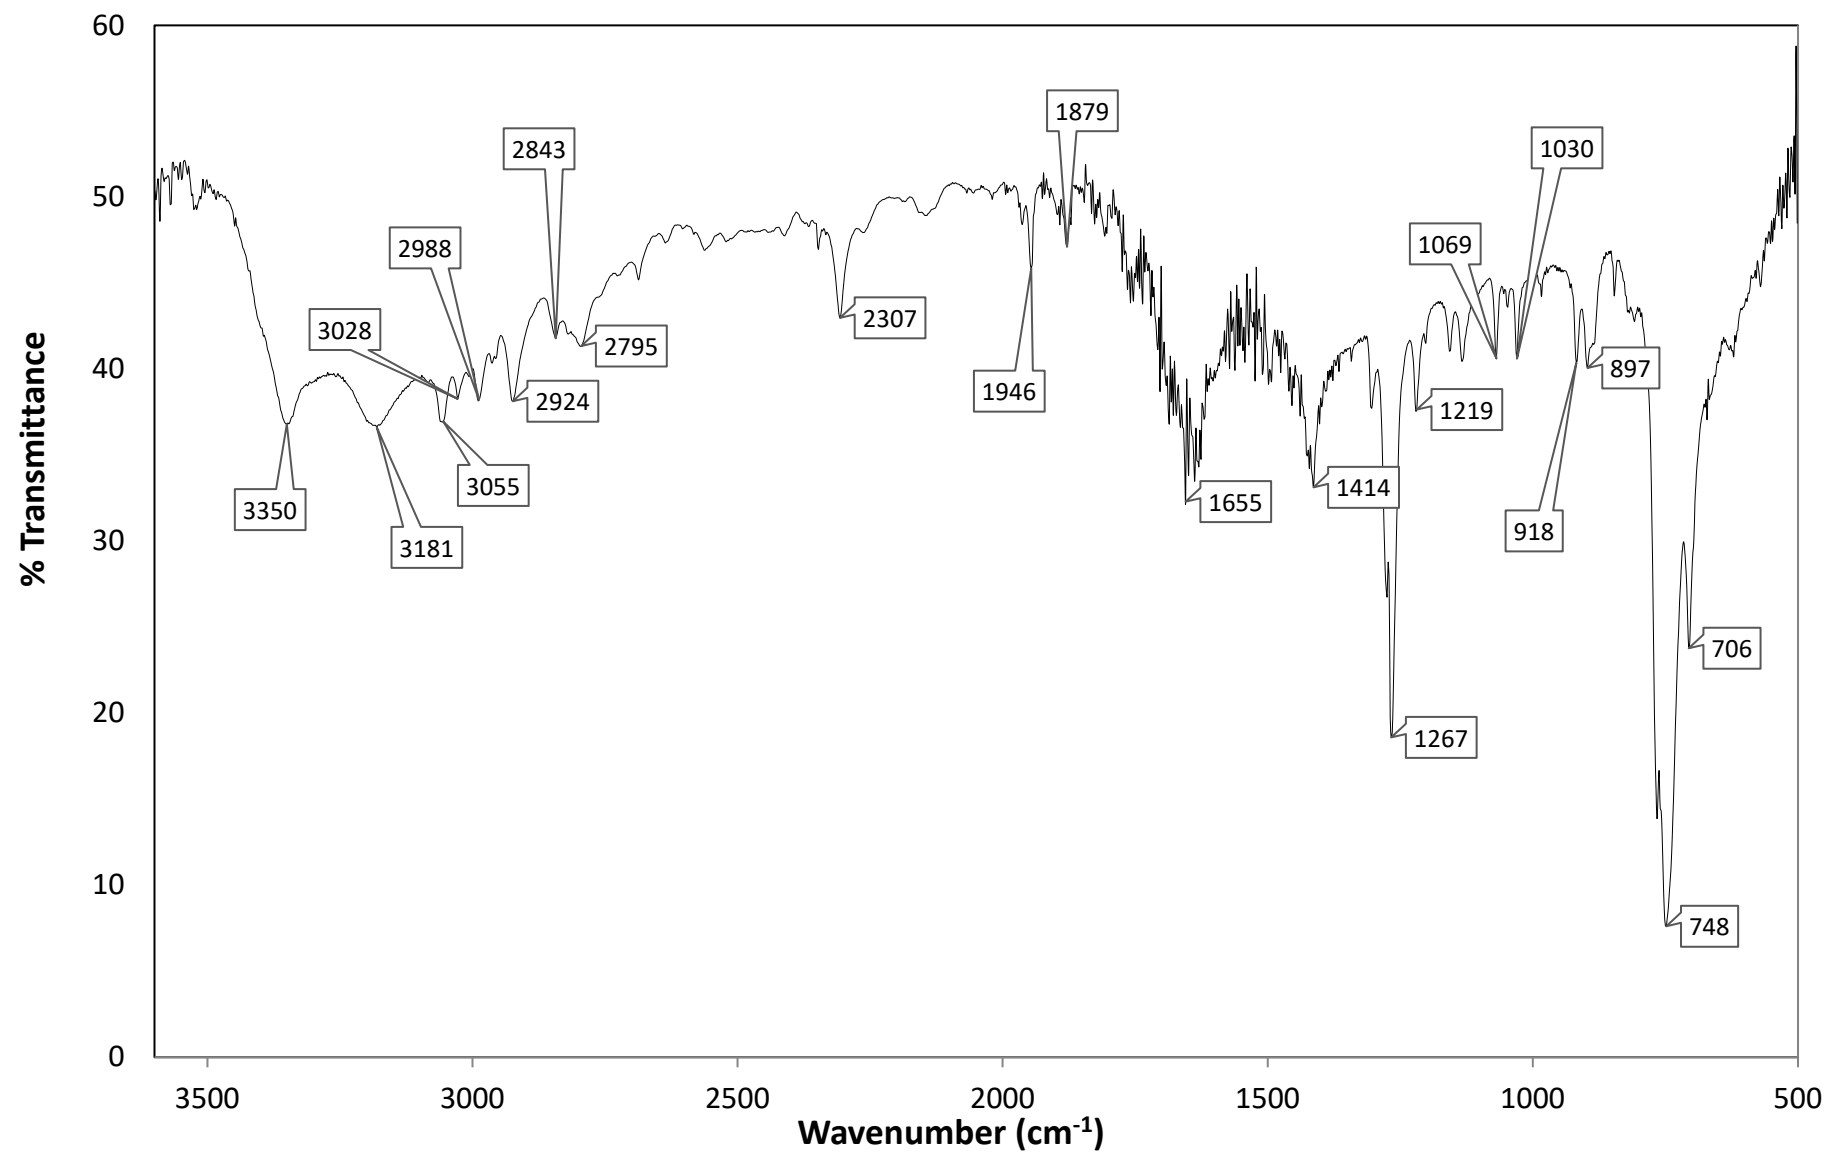

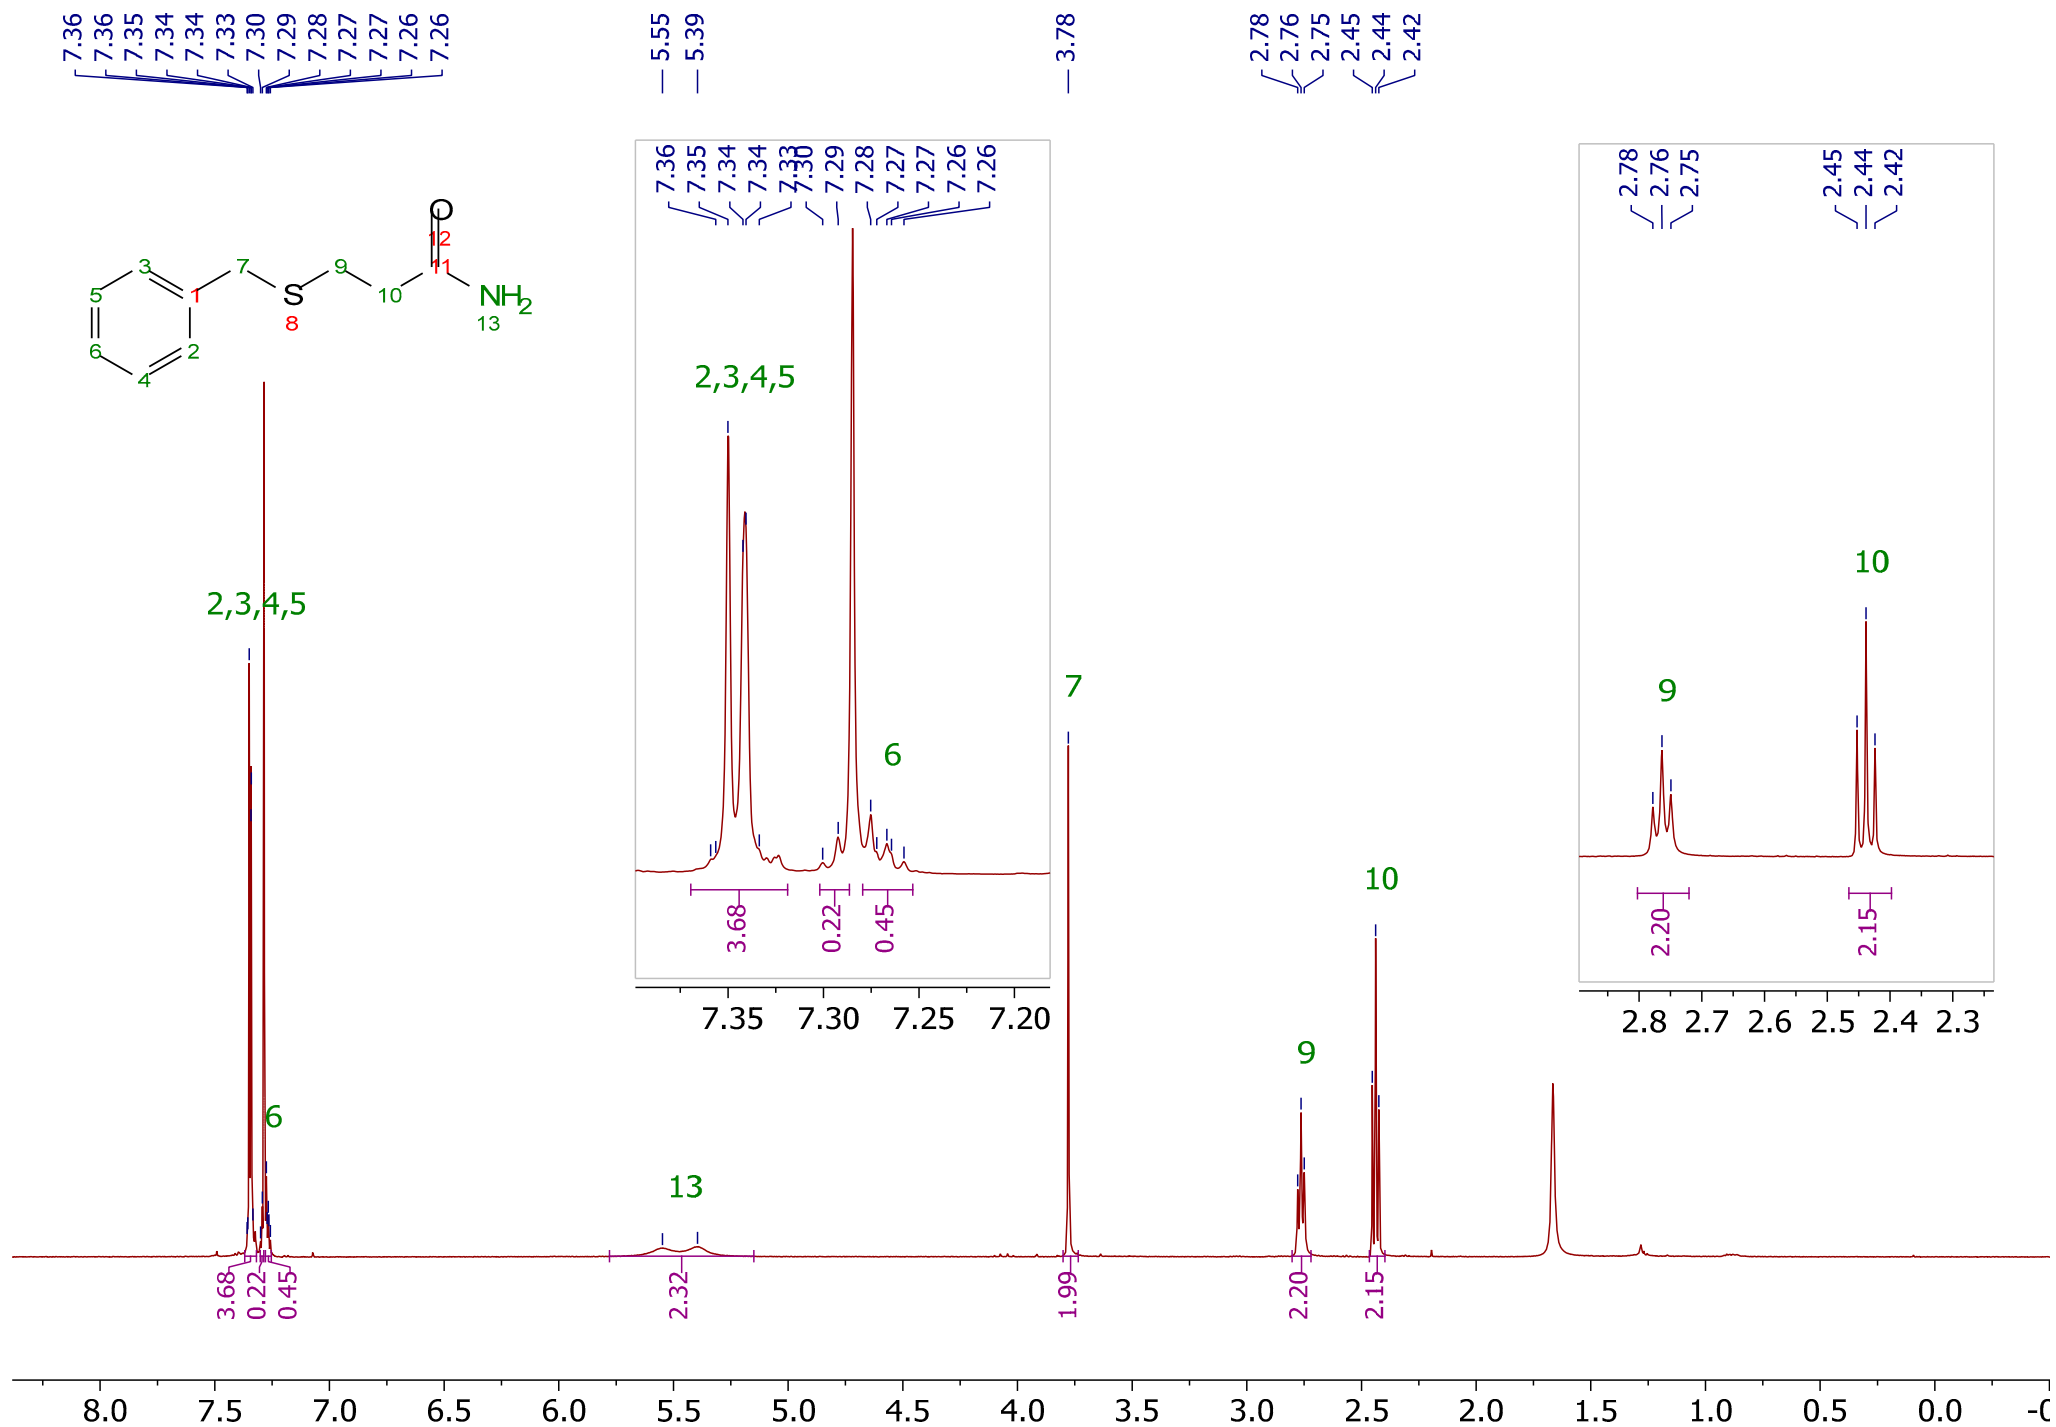

**(3k) ethyl 3-(naphthalen-1-ylthio)propanoate**

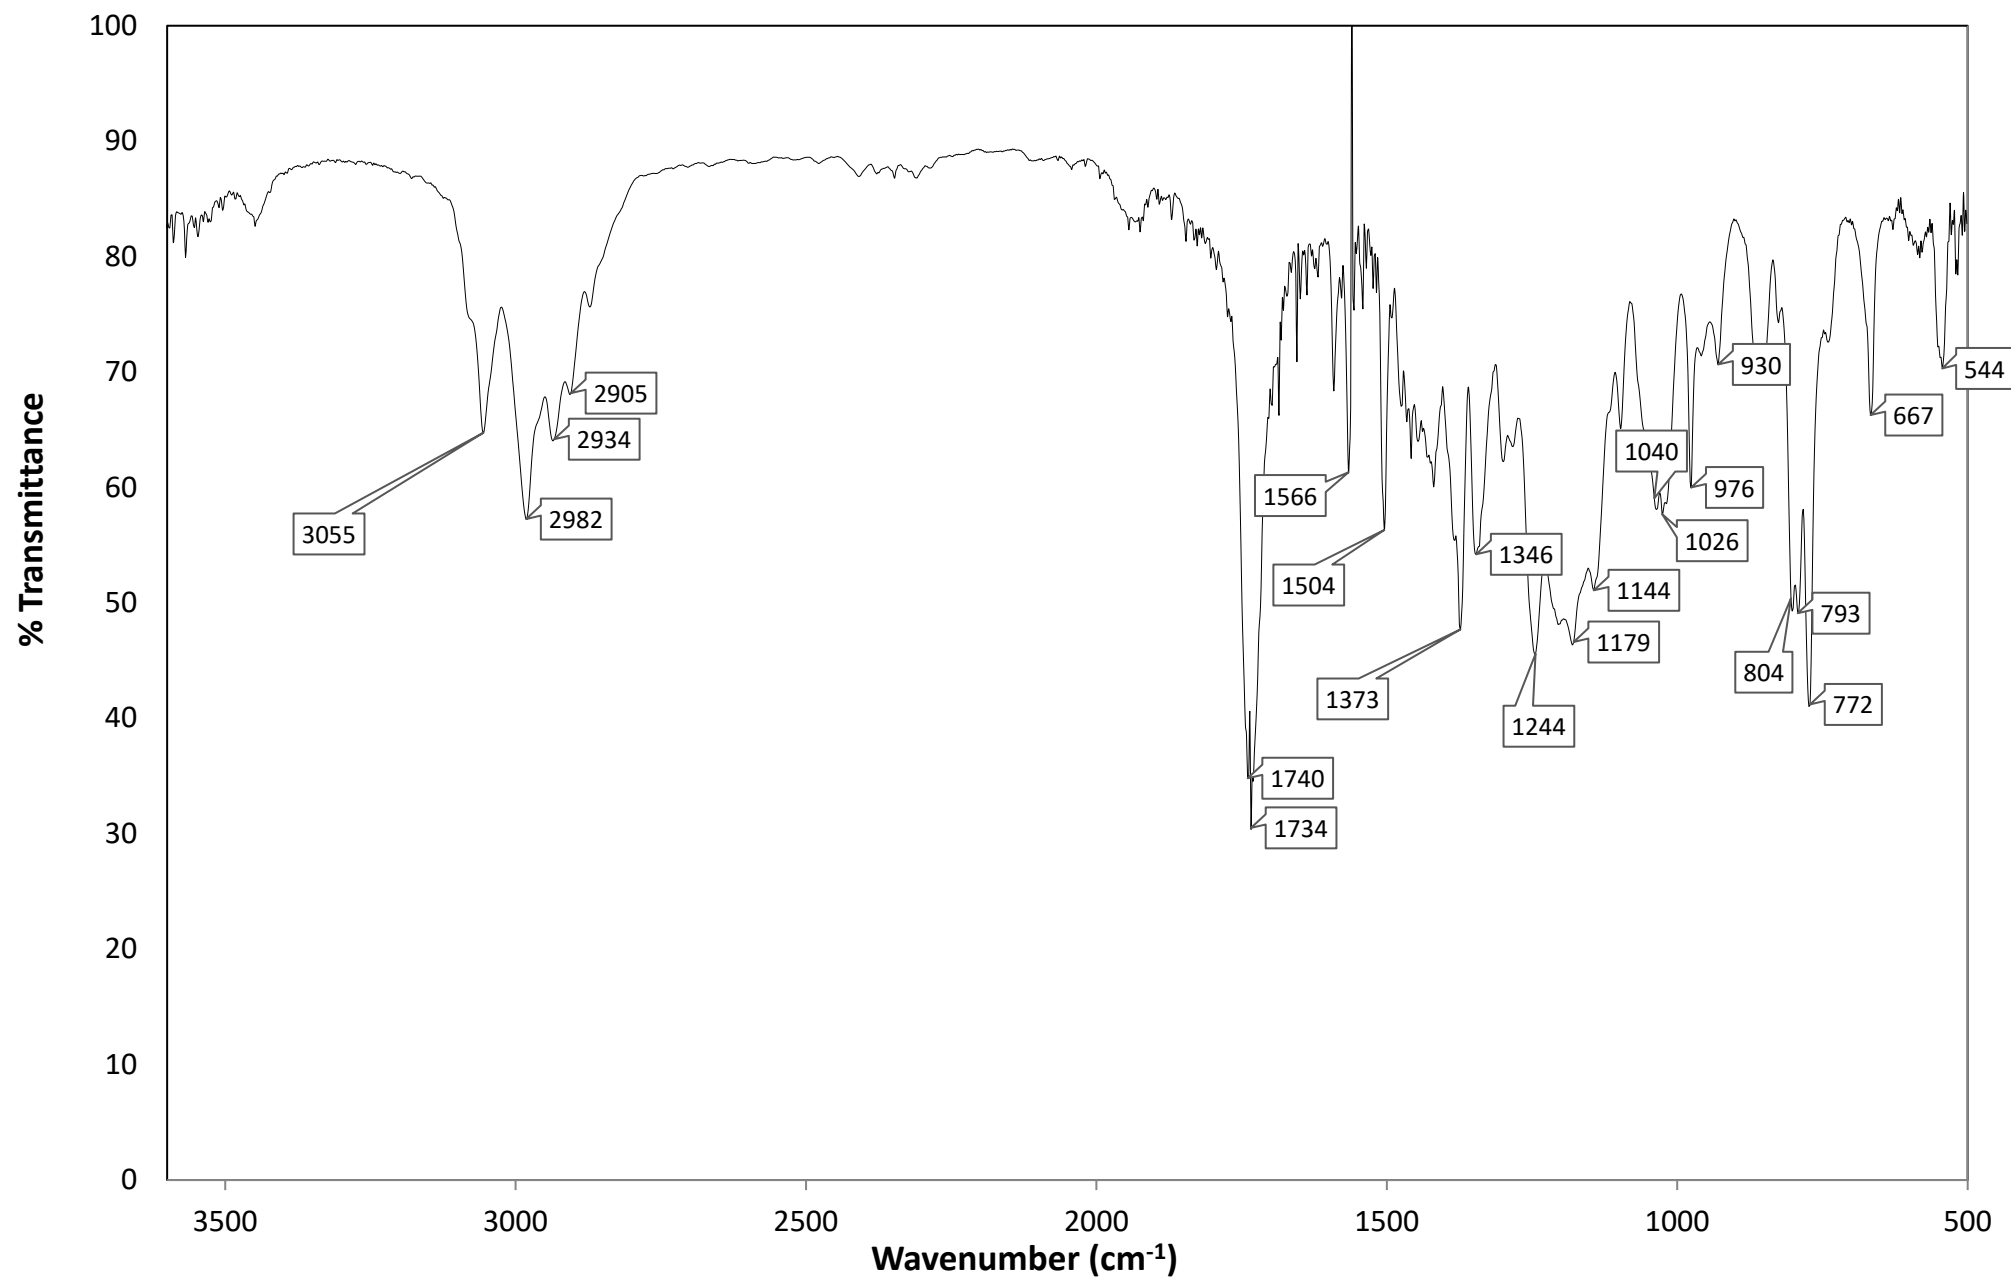

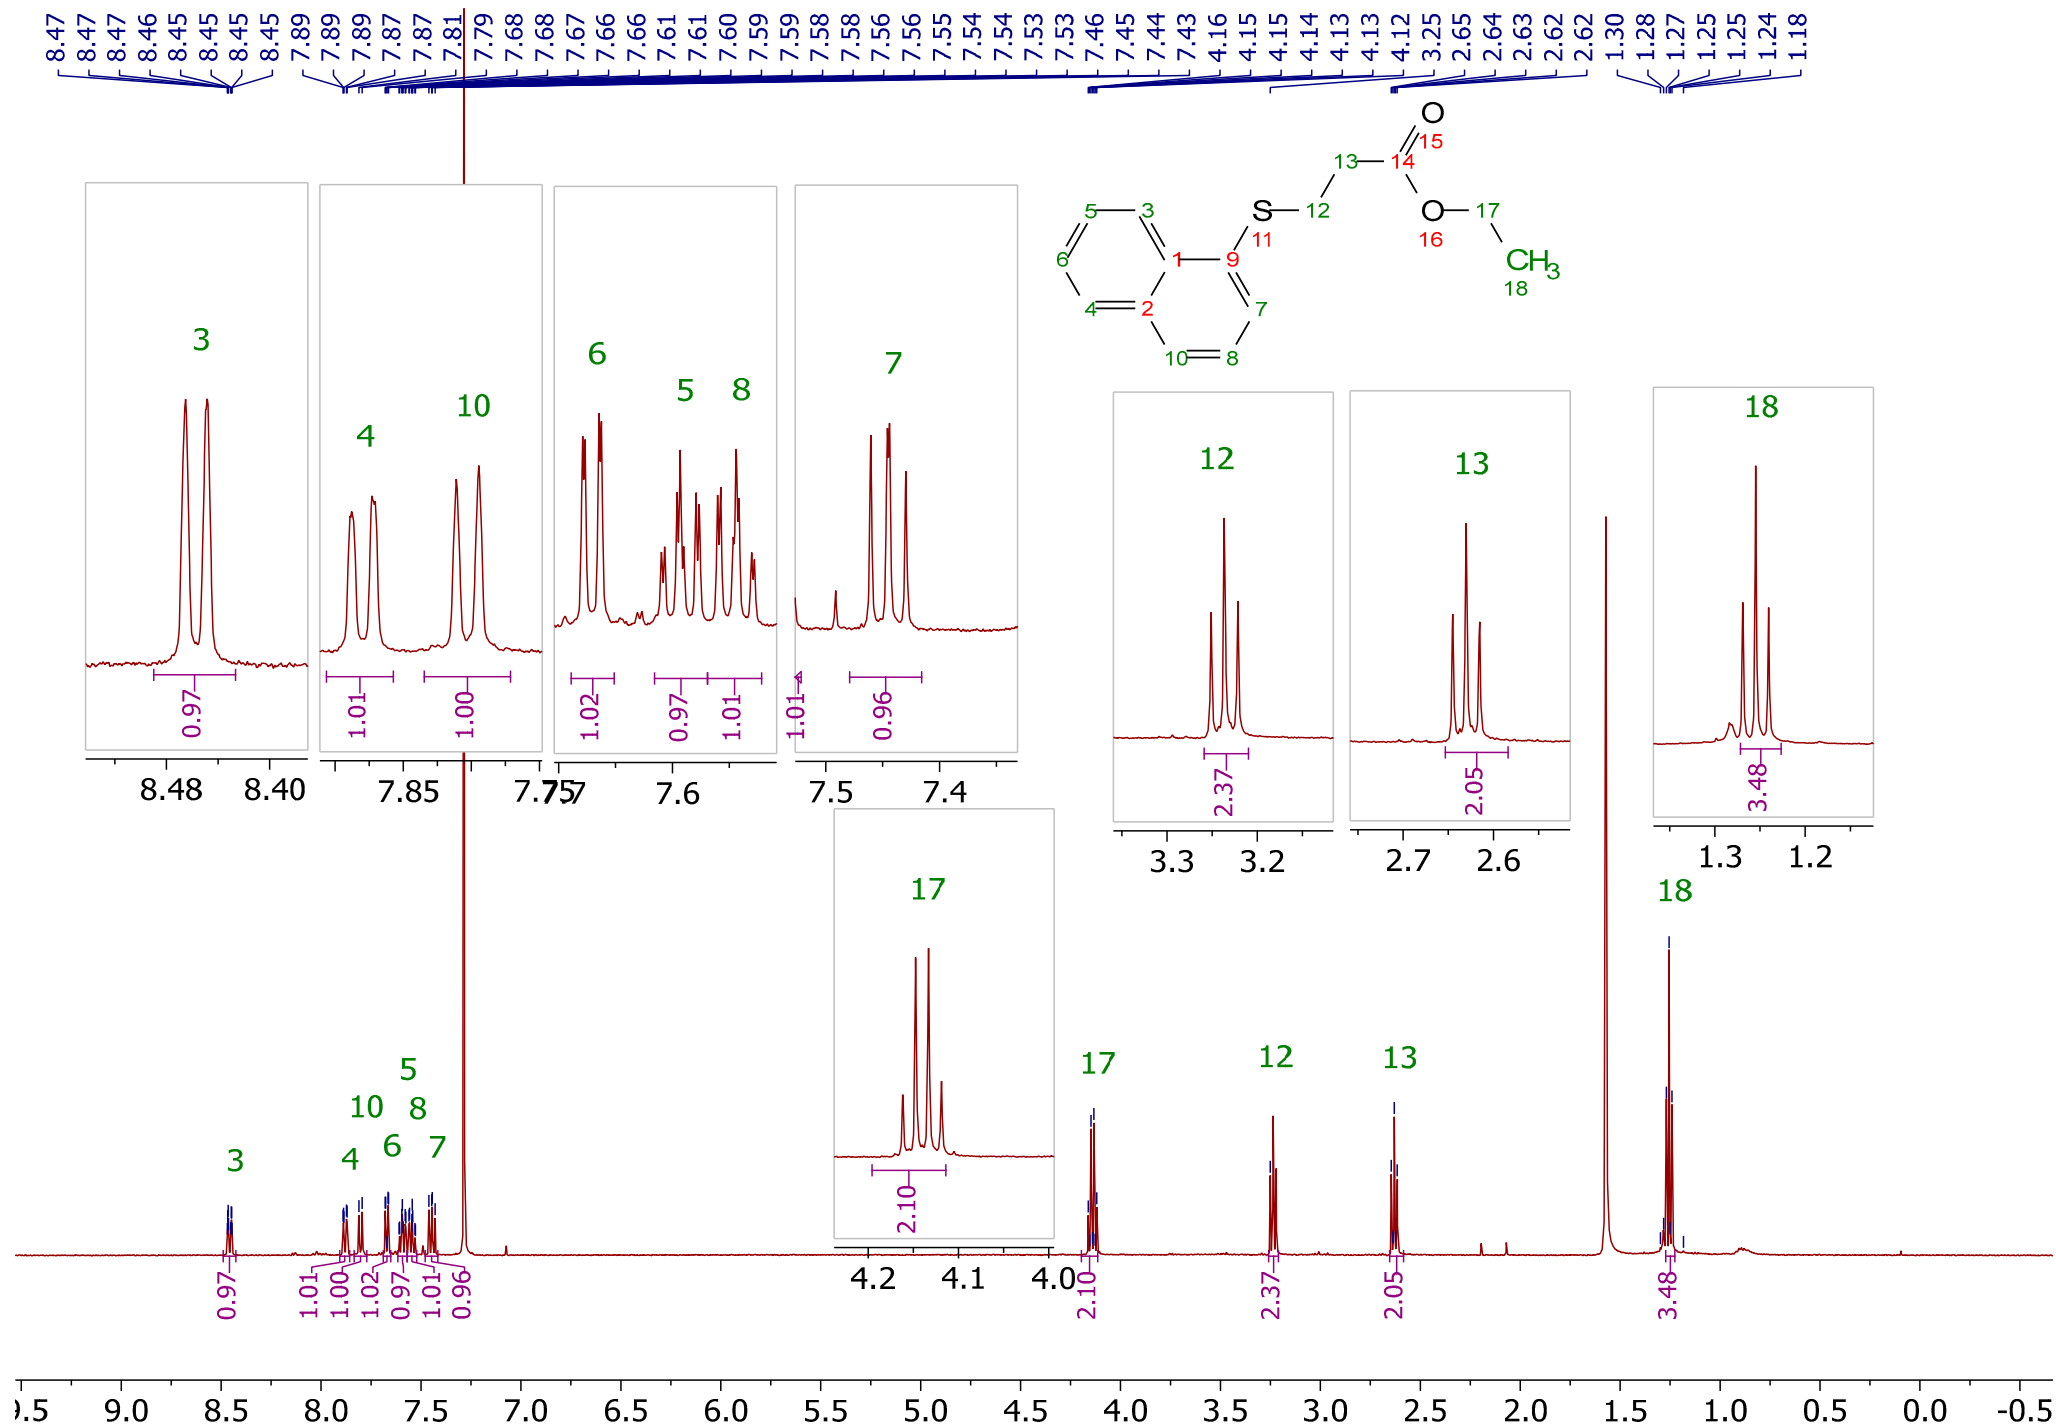

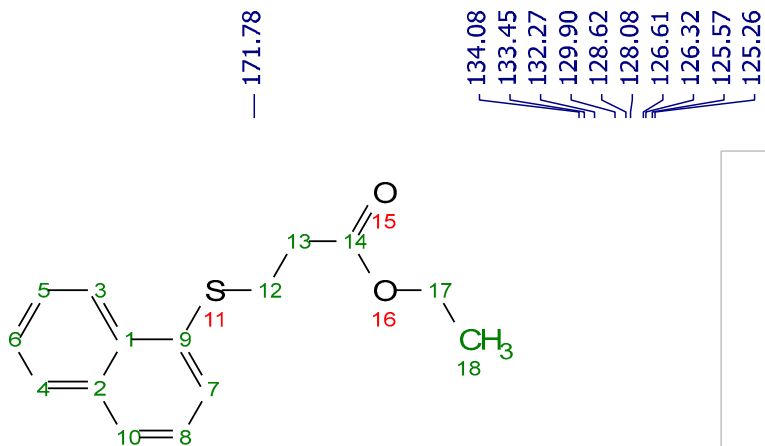

134.08  
133.45  
132.27  
129.90  
128.62  
128.08  
126.61  
126.32  
125.57  
125.26

60.72

34.56

29.64

14.19

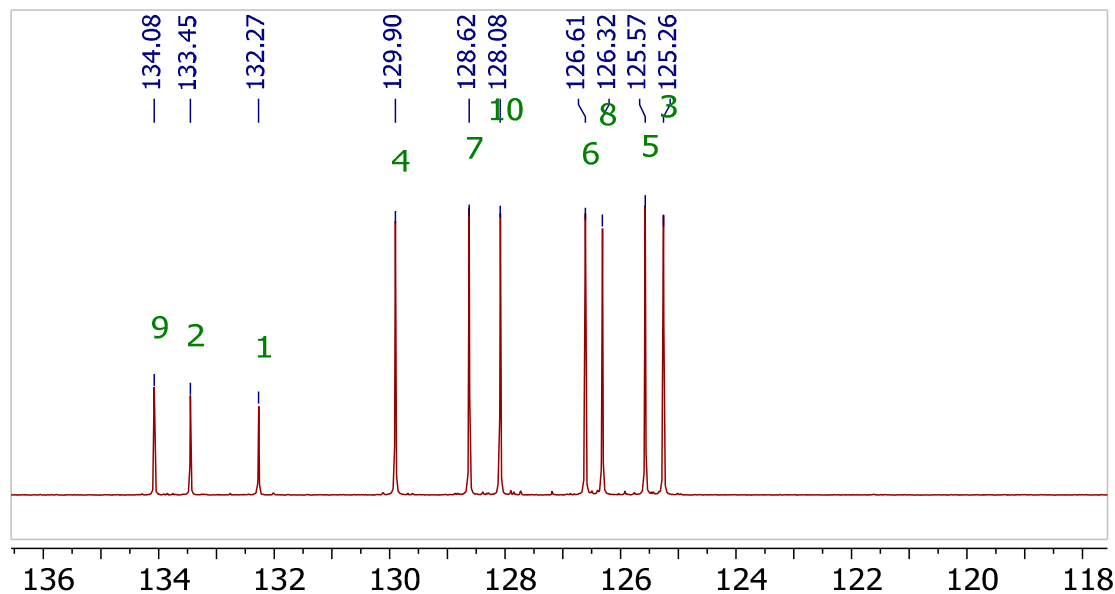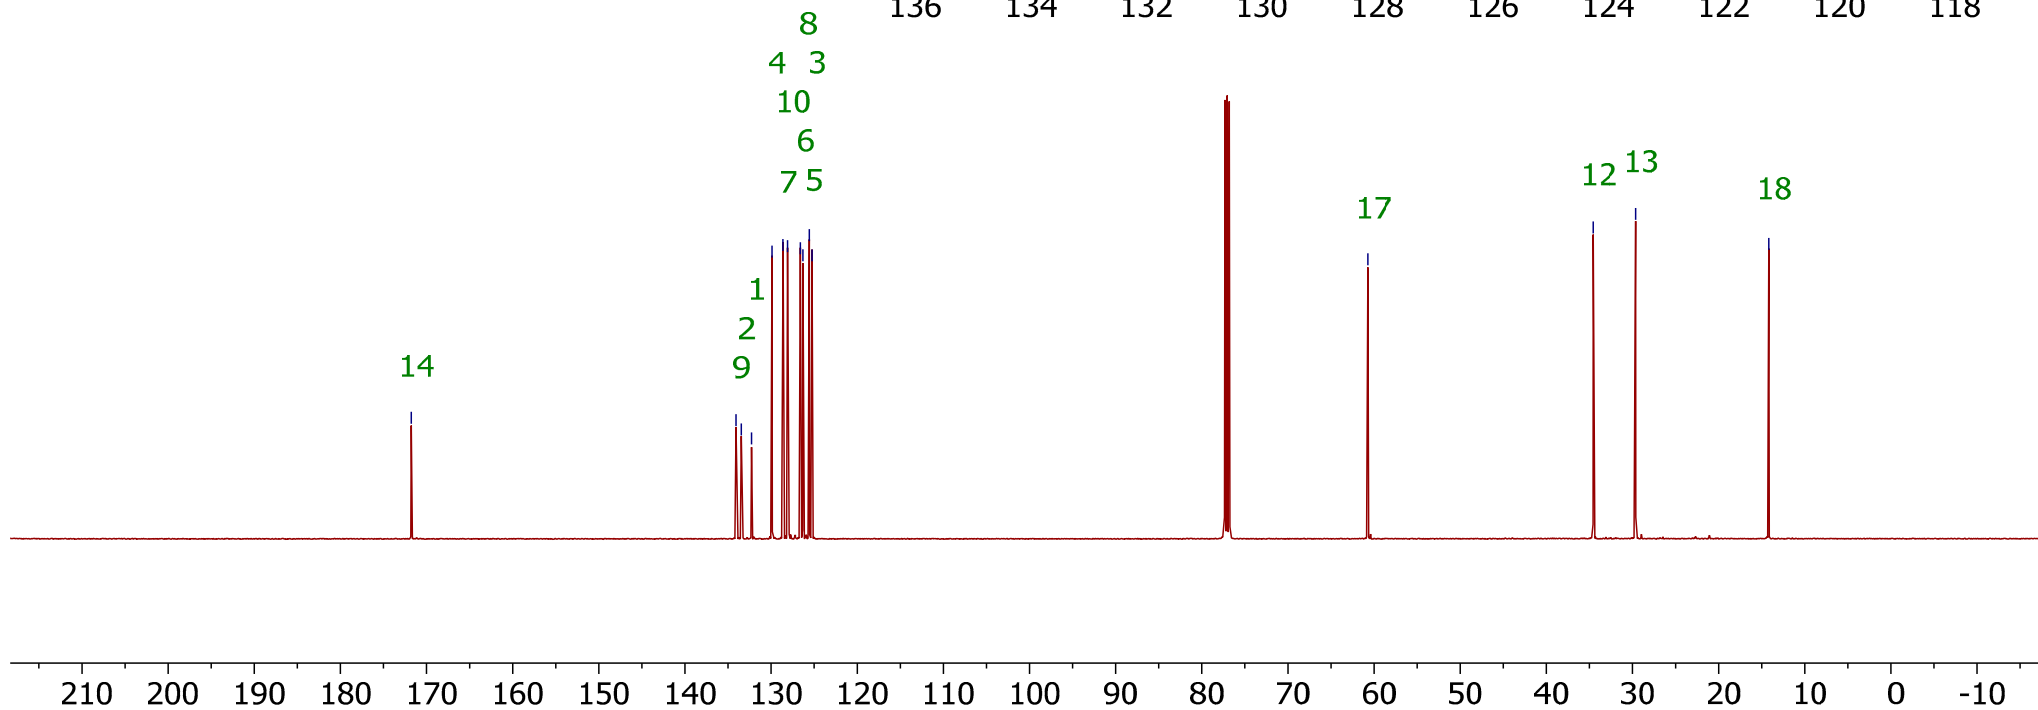

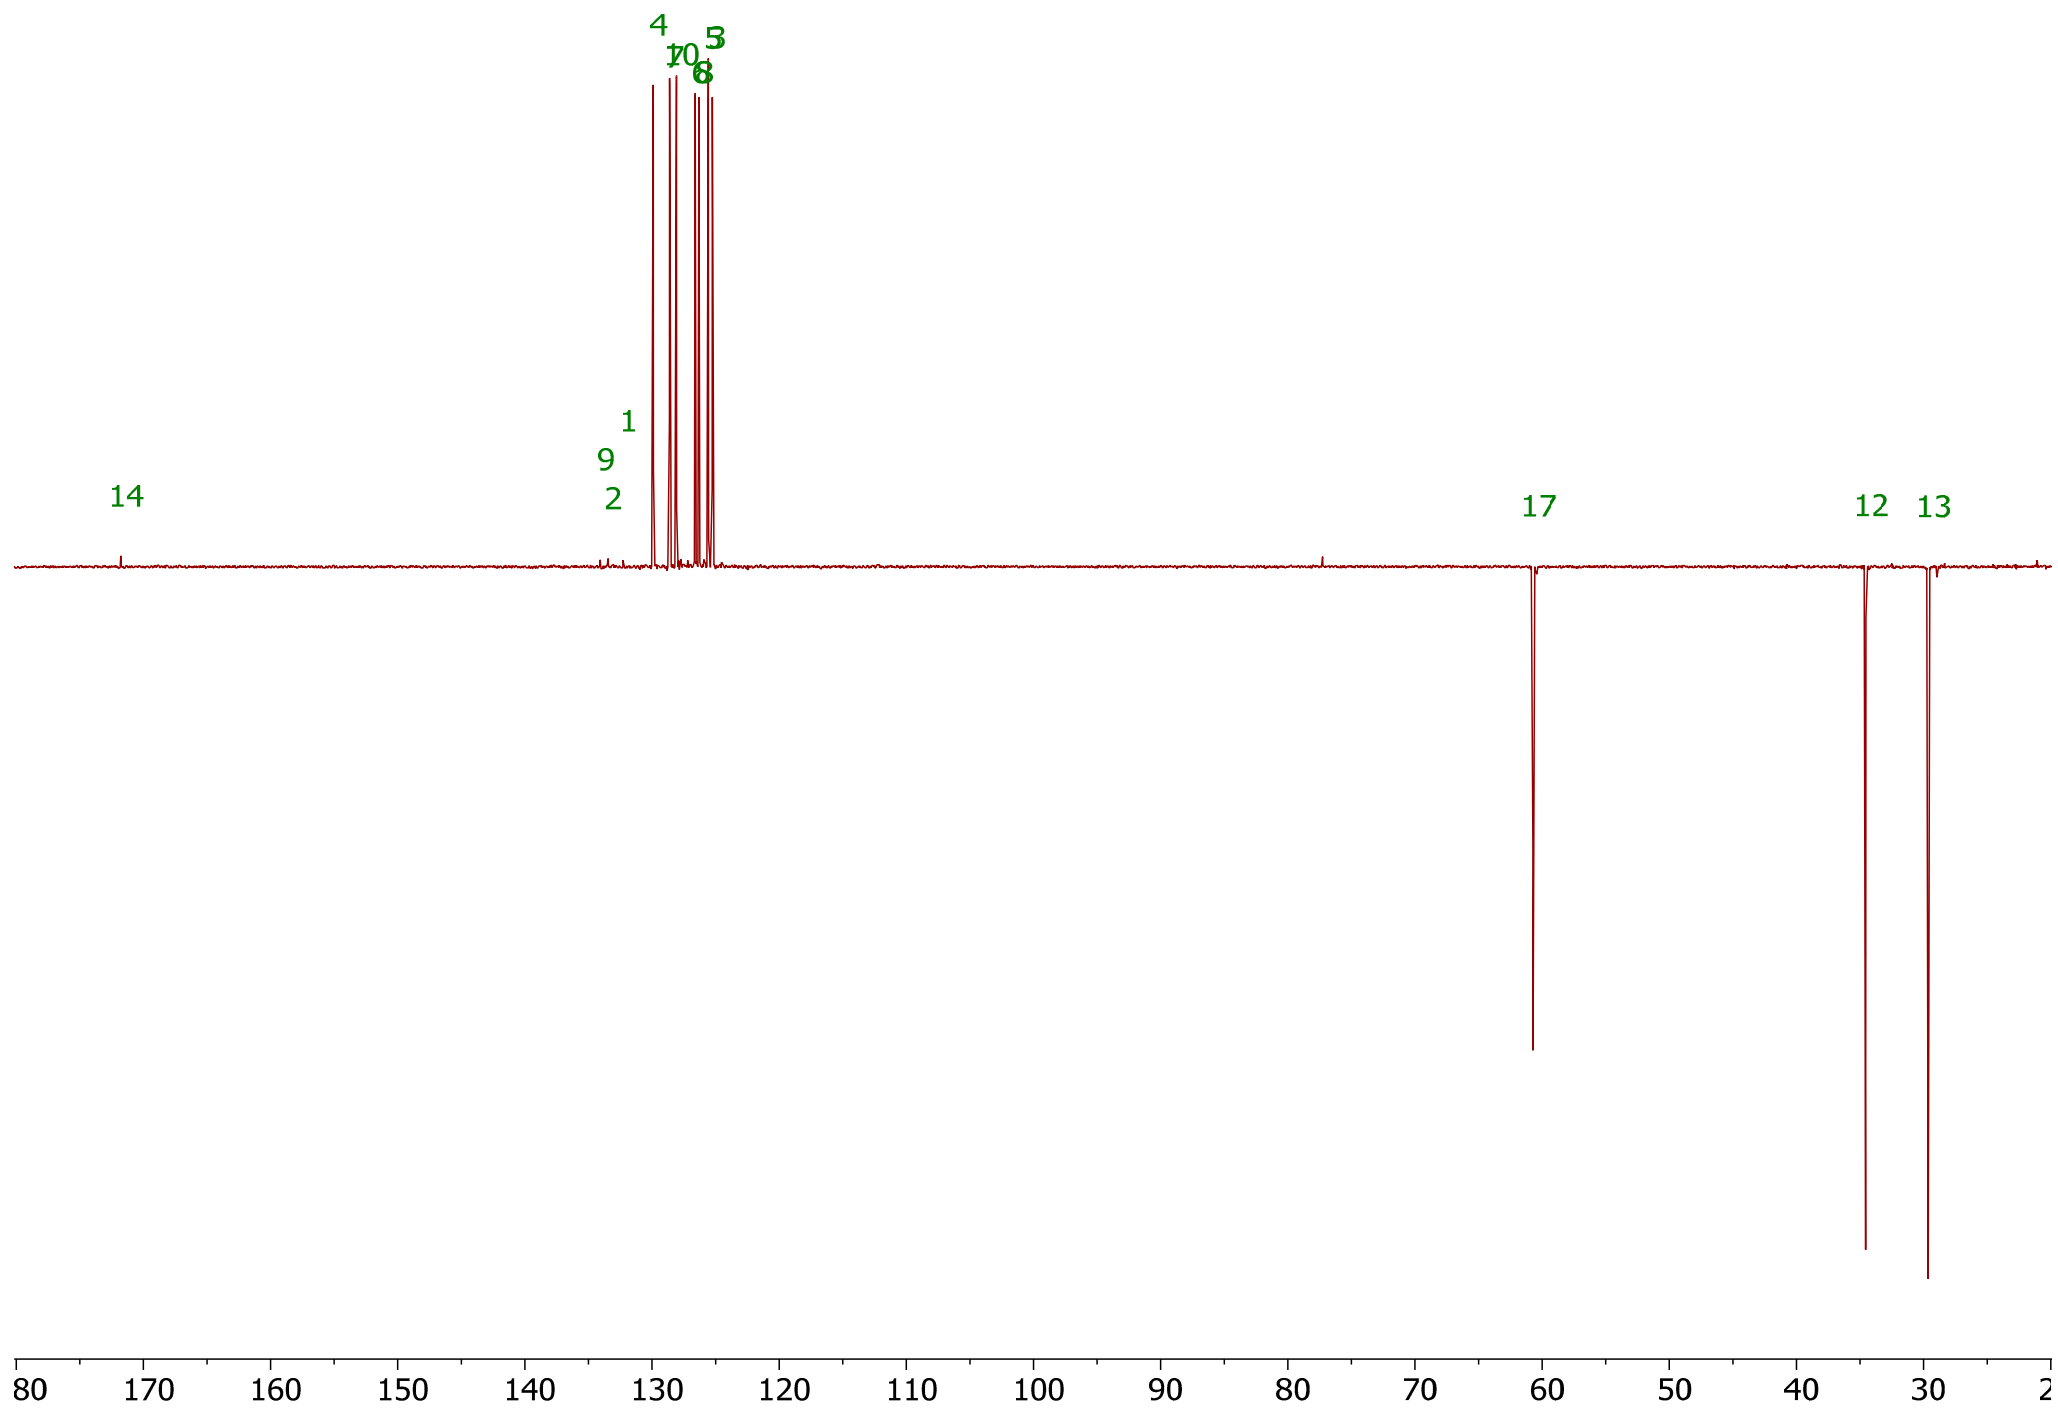

AP 21 25 (0.838)

Scan AP+  
1.34e8

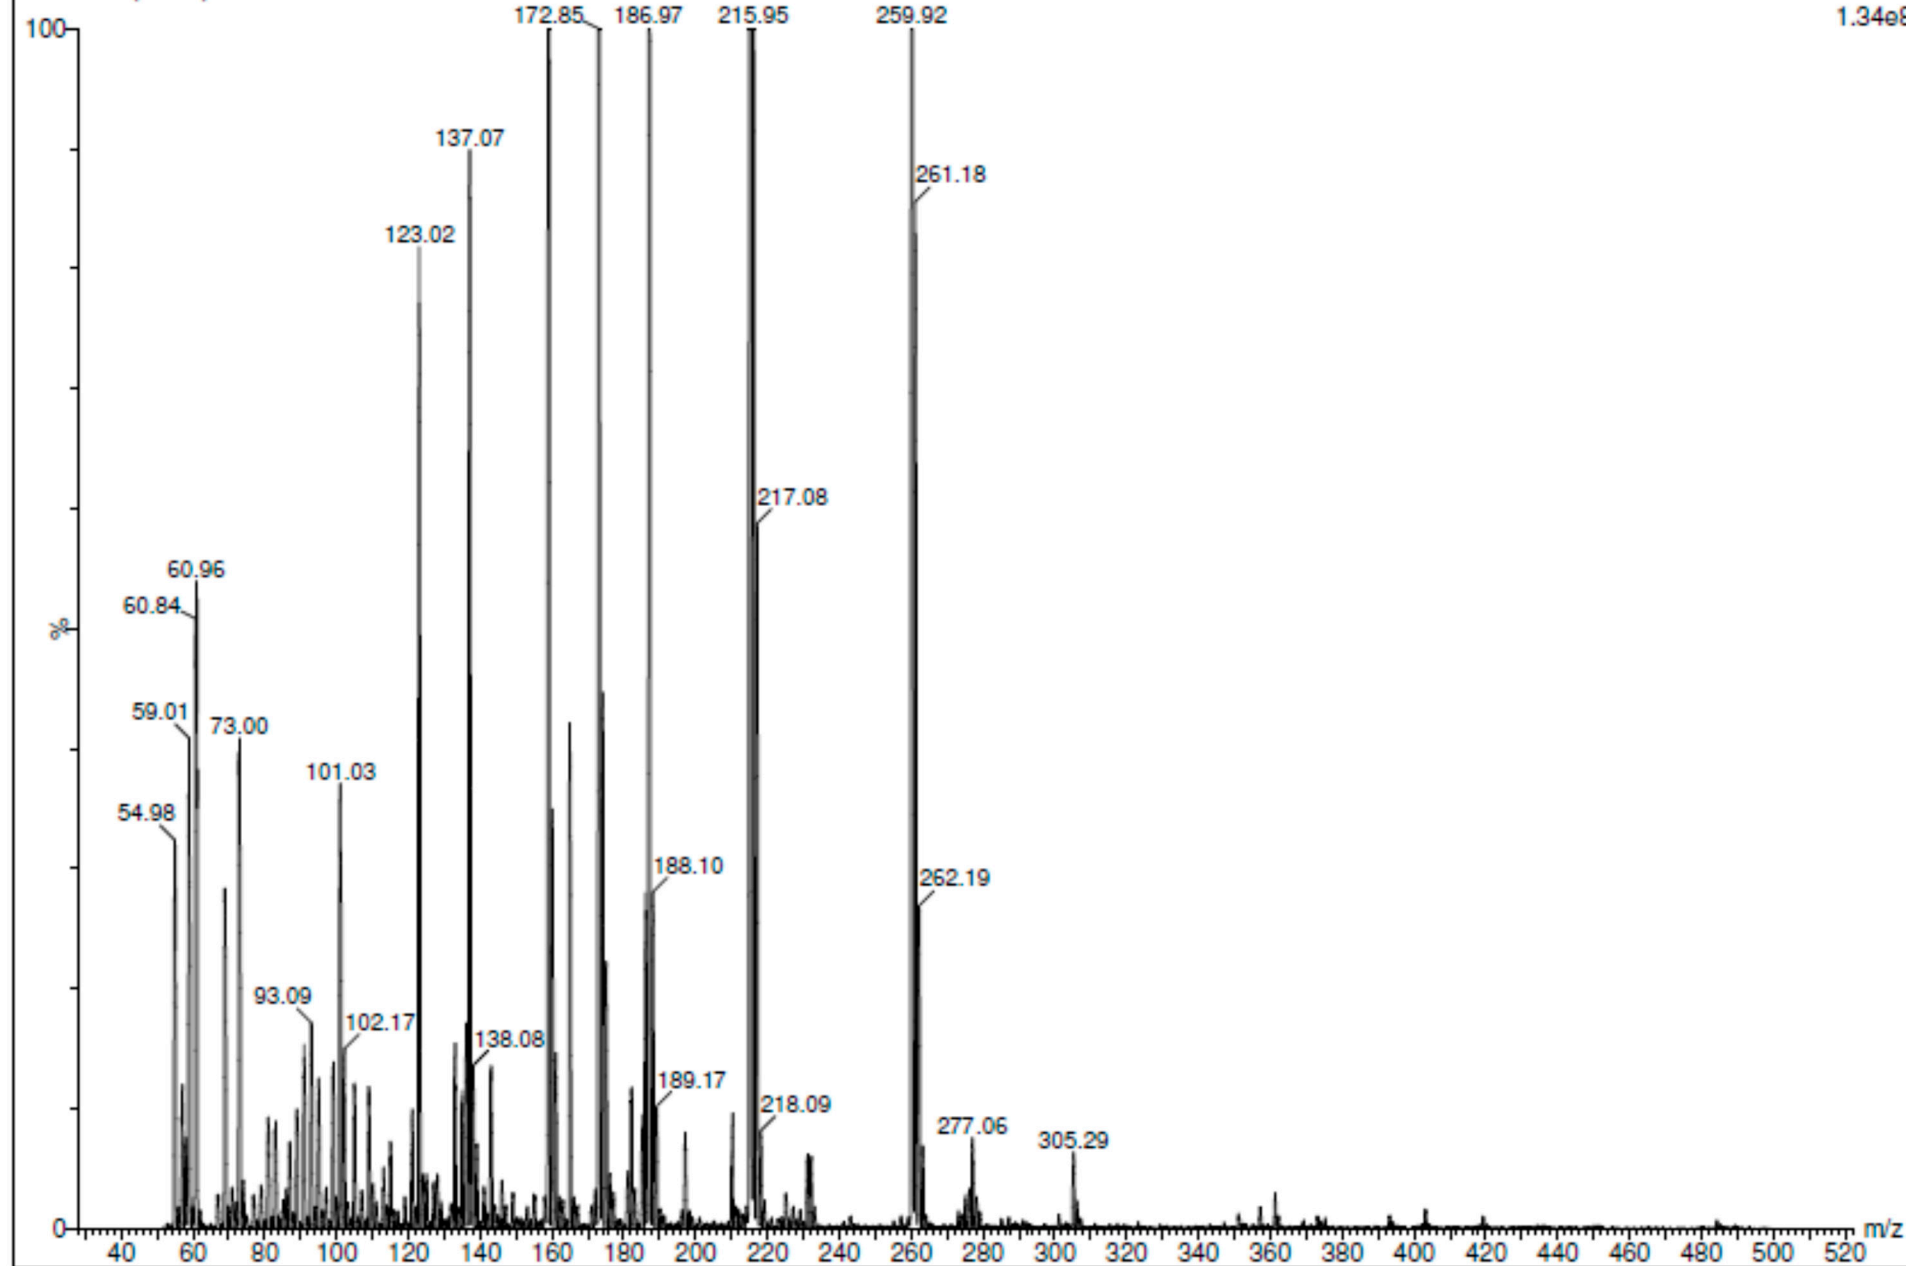

Supplement: s1 [file s1]
